## Thirty clues to the exceptional diversification of flowering plants

Susana Magallón<sup>1</sup>, Luna L. Sánchez-Reyes<sup>2</sup>, Sandra L. Gómez-Acevedo<sup>1</sup>

5

<sup>1</sup>Departamento de Botánica, Instituto de Biología, Universidad Nacional Autónoma de México, 3er Circuito de Ciudad Universitaria, Del. Coyoacán, Ciudad de México 04510, México.

<sup>2</sup>Posgrado en Ciencias Biológicas, Instituto de Biología, Universidad Nacional Autónoma de México, 3er Circuito de Ciudad Universitaria, Del. Coyoacán, Ciudad de México 04510, México.

10

Author for correspondence:

*Susana Magallón*

*Tel: +52 55 5622 9087*

15 *Email: [s.magallon@ib.unam.mx](mailto:s.magallon@ib.unam.mx)*

## Summary

- As angiosperms became one of the megadiverse groups of macroscopic eukaryotes, they forged modern ecosystems and promoted the evolution of extant terrestrial biota. Unequal distribution of species among lineages suggests that diversification, the process which ultimately determines species-richness, acted differentially through angiosperm evolution. 20
- We investigate how angiosperms became megadiverse by identifying the phylogenetic and temporal placement of exceptional radiations, by combining the most densely fossil-calibrated molecular clock phylogeny with a Bayesian model that identifies diversification shifts among evolutionary lineages and through time. We evaluate the effect of the prior number of expected shifts in the phylogenetic tree. 25
- Major diversification increases took place over 100 Ma, from the Early Cretaceous to the end Paleogene, and are distributed across the angiosperm phylogeny. Angiosperm long-term diversification trajectory shows moderate rate variation, but is underlain by increasing speciation and extinction, and results from temporally overlapping, independent radiations and depletions in component lineages. 30
- The identified deep time diversification shifts are clues to identify ultimate drivers of angiosperm megadiversity, which probably involve multivariate interactions among intrinsic traits and extrinsic forces. An enhanced understanding of angiosperm diversification will involve a more precise phylogenetic location of diversification shifts, and integration of fossil information. 35

**Key words:** birth-death models, phylogeny, fossil record, molecular clock, radiation, speciation, extinction

## 40 Introduction

Flowering plants (Angiospermae) represent the most recent evolutionary explosion of embryophytes, a lineage that occupied land at least 470 million years ago (Ma) (Rubinstein *et al.*, 2010), and diverged from their closest living relatives 300-350 Ma (Magallón *et al.*, 2013). Since their first appearance in the fossil record, angiosperms have radiated exceptionally, 45 surpassing all other plant lineages not only in sheer species-richness, but to become ecologically predominant forming the structural and energetic basis of nearly all extant terrestrial biomes. Through their ecological expansion, angiosperms promoted the diversification of other plants (Schneider *et al.*, 2004, Laenen *et al.*, 2014), animals (Cardinal & Danforth, 2013; Wang *et al.*, 2013), fungi (Guzmán *et al.*, 2013, Kraichak *et al.*, 2015), and 50 bacteria (Goffredi *et al.*, 2011). Human nutrition, culture, and well-being inextricably depend on angiosperms.

With between 295,000 and 304,000 described species (Christenhusz & Byng, 2016; The Plant List, 2017) and an estimated total of >350,000 species (Joppa *et al.*, 2010), angiosperms are among the megadiverse groups of macroscopic eukaryotes. Their exceptional diversity is 55 distributed unequally among evolutionary lines, some of which include tens-of-thousands of species (e.g., orchids, composites) and others fewer than ten (e.g., lotus, London planes), indicating that the process of diversification, the balance between speciation and extinction which ultimately determines species-richness (subsequently diversity), has acted differentially through angiosperm evolution.

60 Many studies have attempted to identify the factors that underlie angiosperm exceptional diversity, including intrinsic attributes (Farrell *et al.*, 1991; Sargent, 2004), ecological interactions (Weber & Agrawal, 2014; van Der Niet & Johnson, 2012), extrinsic opportunity (Hughes & Atchinson, 2015; Moore & Donoghue, 2007), or complex interactions among them (Vamosi & Vamosi, 2011; Spriggs *et al.*, 2015). Nevertheless, little is known about 65 the dynamics of the diversification process that underlies the acquisition of angiosperm megadiveristy through time, and its unequal distribution among phylogenetic branches. A long tradition considered that the myriad of angiosperm unique vegetative and reproductive attributes made them competitively superior (Stebbins, 1974). Studies based on current

phylogenetic understanding have shown that it is unlikely that increased phylogenetic  
70 branching characterizes angiosperms as a whole (Sanderson & Donoghue, 1994). Groups with  
unexpectedly high or low diversity, given a time-homogeneous diversification rate, have been  
identified (Magallón & Sanderson, 2001); and diversification tests based on tree asymmetry or  
model selection have found significant imbalance in net diversification rates among angiosperm  
75 lineages (Davies *et al.*, 2004); that diversification shifts do not always correspond to named  
taxonomic entities (Smith *et al.*, 2011); and that some occurred downstream major genomic  
duplications (Tank *et al.*, 2015).

The fossil record unequivocally documents an Early Cretaceous crown angiosperm  
explosive radiation shortly following the appearance between the Valanginian and the  
Hauterivian (140-130 Ma) of pollen grains with a combination of detailed microstructural  
80 attributes found only among some angiosperm lineages (Hughes & McDougall, 1987; Brenner,  
1996). Immediately younger sediments contain an explosively increasing diversity of pollen  
types and vegetative and reproductive remains representing early angiosperm branches (Friis *et al.*  
*et al.*, 2004, 2009) and their major evolutionary lineages (Doyle *et al.*, 1977; Eklund *et al.*, 2004;  
Mohr & Bernardes-de-Oliveira, 2004; Herendeen *et al.*, 2017).

85 In this study we investigate the dynamics of angiosperm macroevolutionary  
diversification to investigate the phylogenetic placement of major diversification shifts, if there  
are phylogenetic regions and times in which radiations are concentrated, if there have been  
diversification decreases through angiosperm evolution, and, by examining their long term  
diversification trajectory, if angiosperms are in decline. We use a molecular Bayesian  
90 phylogenetic tree in which ca. 90% of angiosperm families are represented. This tree was dated  
with a relaxed molecular clock informed by 136 critically selected fossil-derived calibrations  
(Magallón *et al.*, 2015), and the crown group age constrained within a confidence interval  
derived from a quantitative paleobiology method (Marshall, 2008). To our knowledge, it  
represents the most densely-calibrated molecular time-tree available. Using this  
95 comprehensive time-tree, we applied Bayesian analysis of Macroevolutionary Mixtures (BAMM;  
Rabosky, 2014; Rabosky *et al.*, 2014), a method that through a Compound Poisson Process,  
identifies major shifts in the rate of diversification among phylogenetic branches and through

time. To account for the possibility that BAMM produces posterior estimates of the number of diversification shifts that are indistinguishable from the prior (Moore *et al.*, 2016), we  
100 conducted independent analyses covering a range of values for the prior on the number of expected shifts across the tree, and provide technical results. Our results identify the phylogenetic and temporal placement of diversification shifts associated with the origins of angiosperm megadiversity, and model angiosperm long-term diversification trajectory, suggesting ongoing species accumulation.

105

## Materials and Methods

### Taxonomic sample, molecular data and phylogenetic analyses

The diversification study is based on a previously published, temporally calibrated phylogenetic tree of angiosperms (Magallón *et al.*, 2015). The taxonomic sample includes 792 angiosperms,  
110 six gymnosperms representing Cycadophyta, Gnetophyta and Coniferae, and a fern belonging to Ophioglossaceae. The angiosperms belong to 374 families, representing 87% of those recognized by the Angiosperm Phylogeny Website in April 2013 (Stevens, 2013), and encompass 99% of angiosperm total species-richness. The molecular data are the concatenated sequences of three plastid protein-coding genes (*atpB*, *rbcl* and *matK*) and two nuclear markers  
115 (18S and 26S nuclear ribosomal DNA), which form an alignment of 9089 base pairs (bp). We attempted to maximize data completeness by including sequences of species of the same genus when sequences of the same species were not available. When unavailable at the genus level, the sequence was left as missing data. Separate alignments of the sequences of different markers were conducted with MUSCLE v3.7 (Edgar, 2004), followed by manual refinements  
120 with BIOEDIT v7.0.9.0 (Hall, 1999). The sampled species and families, and GenBank accessions are shown in Table S1. The molecular data set is available from the author.

Phylogenetic estimation was conducted with maximum likelihood (ML) in RAxML v7.2.8 (Stamatakis, 2006a). The data was divided into four partitions: first and second codon positions of *atpB* plus *rbcl*; third codon positions of *atpB* plus *rbcl*; *matK*; and 18S plus 26S. Substitution  
125 parameters were estimated independently for each, using unlinked GTRCAT models. Topological constraints were implemented to specify phylogenetic relationships among major

clades derived from an analysis based on a larger data matrix (Soltis *et al.*, 2011). Trees were rooted with the fern *Ophioglossum*. One thousand bootstrap replicates were implemented (Stamatakis *et al.*, 2006b; Stamatakis, 2008).

130

### Dating analyses.

The ML phylogenetic tree was dated by combining a method derived from quantitative paleobiology to constrain the age of the angiosperm crown node (Marshall, 2008), with an uncorrelated relaxed molecular clock to estimate dates within angiosperms (Drummond *et al.*, 2006). Detailed information about dating analysis, including justification for all calibrations, is provided in the original study (Magallón *et al.*, 2015). Briefly, the confidence interval on the age of the crown node was calculated considering the age of the oldest angiosperm fossils (Hughes & McDougall, 1986; Hughes *et al.*, 1991; Brenner, 1996), and the number of branches in a family-level tree that are represented in the fossil record (Marshall, 2008).

140

Ages within angiosperms were estimated with the uncorrelated lognormal method in BEAST v1.7.5 (Drummond *et al.*, 2006). The data were the alignment used for phylogenetic estimation (above) divided into plastid and nuclear partitions. A birth-death model was used as a tree prior. The root node, corresponding to the seed plant crown node, was calibrated with a uniform distribution between 314 and 350 Ma (Magallón *et al.*, 2013). Internal nodes were calibrated with 136 fossils that were critically evaluated for their affinity to taxa represented in the tree, based either on morphological attributes, or, if available, on explicit phylogenetic placement. Prior age distributions of calibrated nodes were lognormal, with the mean equal to the fossil age plus 10%, and a standard deviation of 1. The calibration fossils, the attributes supporting clade affinity, their assignment to the stem or the crown node of the clade, their stratigraphic position and age are available in the original publication (Magallón *et al.*, 2015) and from the author. The analysis consisted of eight independent MCMC runs for a total of  $170 \times 10^6$  steps, sampling one every 5000. The initial 600 trees from every run were excluded as burn-in. The outputs of the runs were analysed with Tracer v1.5 (Rambaut *et al.*, 2014), and the estimated parameters joined with LogCombiner v1.7.5 and TreeAnnotator v1.7.5 (Drummond *et al.*, 2006).

155

## Diversification Analyses.

The macroevolutionary diversification dynamics of angiosperms were investigated with the C++ programme Bayesian Analysis of Macroevolutionary Mixtures (BAMM) v2.5.0 (Rabosky, 2014, 2017; Rabosky *et al.*, 2014, 2017; Mitchell & Rabosky, 2016), which, through a compound Poisson process (CPP) implemented as a reversible jump Markov Chain Monte Carlo (rjMCMC), estimates major shifts in the rates of speciation, extinction, and diversification among the branches of a phylogenetic tree, and through time. Post-run analyses were conducted with the R package BAMMtools v2.5.0 (Rabosky *et al.*, 2014).

165

**The BAMM method.** BAMM simulates a posterior distribution of shift configurations, each corresponding to a particular combination of the number shifts (increases and decreases in diversification, speciation or extinction), and their phylogenetic and temporal placement among the branches of the tree. Given the posterior sample of shift configurations derived from the rjMCMC, it is possible to obtain a phylorate plot in which the rate of speciation, extinction or diversification averaged across all the configurations in the posterior distribution is plotted on each time unit on each branch (Rabosky, 2017).

In the BAMM model, the prior distribution of the expected number of shifts in the tree (expectedNumberOfShifts parameter) influences the number of shifts in the posterior distribution. Under the prior, the distribution of shifts across the tree is uniform, and the probability of finding a shift on a given branch depends on the specified prior for the number of shifts, and on the branch length (Rabosky, 2014, 2017). Thus, a high prior value specified for expectedNumberOfShifts will result in a high number of shifts in the posterior distribution, although many of them might be weakly supported by the data (Rabosky 2014, 2017).

Significant shifts can be distinguished by considering the Marginal Odds Ratio (MOR) of a shift being present in a given branch. Because under the prior long branches are more likely to contain a shift, the MOR provides a measure of the amount of evidence supporting a shift on a given branch after normalizing for its length, that is, independently of the prior (Rabosky, 2017; Shi & Rabosky, 2015).

185 Moore and collaborators (Moore *et al.*, 2016) pointed out that BAMM cannot provide  
reliable estimates of diversification rate shift models, or diversification rate parameters, mainly  
because its likelihood function does not account for rate shifts that took place on extinct  
branches; and, because there might be an infinite amount of equally likely CPP model  
parameterizations for the number and magnitude of shifts on the branches of the phylogeny,  
190 the posterior estimates are extremely sensitive to the prior number of shifts in the tree. After  
critically examining these claims, Rabosky and collaborators (Rabosky *et al.*, 2017) concluded  
that although BAMM and (possibly except for Monte Carlo likelihood in Moore *et al.*, 2016) all  
models that estimate rate shifts through time and on different parts of the phylogeny, do not  
account for rate shifts on extinct (or otherwise unobserved) branches; the effects that these  
195 unaccounted diversification shifts have in empirical cases are likely to be small. Also, although  
all Bayesian posterior estimates are influenced by the prior, it is possible to identify posterior  
estimates that are strongly supported independently from the prior (Rabosky *et al.*, 2017).  
Hence, the use of Bayes Factor to select BAMM outcomes that are well supported,  
independently of the prior on the expected number of shifts, is strongly advocated (Rabosky,  
200 2017). Specifically, in BAMM and BAMMtools 2.5.0 it is possible to estimate the MOR of a shift  
on a given branch (Rabosky, 2017). Diversification model selection with BAMM is largely robust  
to choice of model prior (Rabosky *et al.*, 2017; Mitchell & Rabosky, 2016).

Identifying diversification shifts, and calculating diversification parameters across a  
phylogeny are complex estimation problems. We are aware that all currently available tools are  
205 imperfect, yet agree that BAMM v2.5.0 has been reasonably proven to achieve the task of  
providing realistic estimates of diversification parameters (Rabosky *et al.*, 2017). While we  
recognize the potential problems in BAMM estimates of diversification shifts and rate  
parameters, to our knowledge no other currently available software can simultaneously achieve  
identification of rate shifts among phylogenetic branches and through time given the sampling  
210 density in this study (i.e., RPANDA [Morlon *et al.*, 2011, 2016] requires at least three terminals  
per clade to evaluate different diversification models). We nevertheless exert caution regarding  
potential prior sensitivity when applying BAMM, and conduct several independent  
diversification analyses under a wide range of magnitudes for the prior of the expected number



of shifts (see below). In each analysis we obtained the MOR associated to the presence of a  
215 shift on any branch, and made comparisons across analyses to identify a congruent set of highly  
supported shifts.

**Investigating Angiosperm Diversification.** The angiosperm dated tree described above  
(Magallón *et al.*, 2015) was used as input chronogram. BAMM was set to conduct a speciation-  
220 extinction analysis. We performed six analyses under different magnitudes for the prior of the  
expected number of shifts (`expectedNumberOfShifts` = 0.1, 1, 5, 10, 50, 100). Priors on rate  
parameters were scaled to our dated tree using the `setBAMMpriors` function in `BAMMtools`.  
The rate parameter of the exponential priors for the initial speciation and extinction values  
(`lambdaInitPrior` and `muInitPrior`) were both set to 4.66095688667462. The prior for the  
225 standard deviation of the normal distribution (mean fixed at zero) of the speciation rate  
regimes shift parameter (`lambdaShiftPrior`) was set to 0.00825917607286971. Constant  
diversification rate branch segments were set to 3 Ma by setting the `segLength` parameter at  
0.02152148, given a crown node age of 139.3956 Ma. Rates were allowed to vary through time  
(`lambdaIsTimeVariablePrior` = 1).

230 The prior distribution of the number of rate shifts was calculated with `BAMMtools`  
v2.5.0 (Rabosky *et al.*, 2014) by considering that the number of rate shifts follows a Poisson  
distribution with a rate parameter determined by an exponential hyperprior (Mitchell &  
Rabosky, 2016), and the finding that the probability of a given number of shifts in BAMM is the  
product of Poisson and exponential densities, which reduces to a simple geometric distribution  
235 on the number of rate shifts (Mitchell & Rabosky, 2016). Non-random incomplete taxon  
sampling of full angiosperm diversity was accounted for by indicating that clade-specific  
sampling probabilities would be used, and by specifying the sampled fraction of clades in the  
tree. Most of the clades correspond to angiosperm families recognized in the Angiosperm  
Phylogeny Website in April, 2013 (Stevens, 2013), with the total number of species in each  
240 family obtained from this same source. Families not represented in the dated tree were  
accounted for by aggregating their species-richness to that of their sister clade, according to  
relationships in the Angiosperm Phylogeny Website. Following `BAMMtools` documentation, for

each terminal in the tree, we specified the represented fraction of the clade to which it belongs by dividing the total species-richness of the clade (i.e., a family or a family plus unsampled sister families) by the number of terminals belonging to that clade. The backbone of the phylogeny is fully sampled. Clade sampling fraction indicated on each terminal are shown in Table S2.

Each MCMC simulation consisted of  $300 \times 10^6$  steps, sampling a shift configuration every 200,000 steps. The initial 10% of the MCMC was discarded as burn-in, hence the total number of analysed posterior samples is 1351. The input tree and control files, and BAMM output event data files are available from the author. For each analysis, we calculated the phylorate plot (Fig. S1), and identified the best and the MSC configurations (available from authors).

For each analysis, we identified the shifts found in all the configurations in the posterior distribution, and estimated their MOR. We sorted the identified shifts by their MOR magnitude. We considered those shifts with a MOR value that falls within the 95% of the magnitude of the maximal MOR found in that analysis (e.g., if for a given analysis the maximal observed MOR is 100, we considered all the shifts with  $MOR \geq 5$ ). We then compared the shifts selected in each analysis across the six analyses, and chose to discuss only those that are shared by at least four analyses. To obtain the time of a shift on a given branch in each analysis, we extracted the age of the shift in all the configurations in which it was detected, and obtained the mean, minimal and maximal values (Fig. 2, Table S3).

## Results

**Technical Results.** BAMM is a method that, through a compound Poisson process (CPP) allows identification of diversification shifts among branches in the phylogenetic tree, and model their change through time (Rabosky, 2014; Rabosky *et al.*, 2014). It also allows for estimation of the average rates of speciation, extinction and diversification of selected lineages, and for the calculation of their temporal trajectories. Being aware of potential nonidentifiability of the model on the number and distribution of diversification shifts, we conducted six independent analyses over a wide range of magnitudes for the prior on the expected number of shifts (expectedNumberOfShifts = 0.1, 1, 5, 10, 50 and 100). In all our analyses, the posterior distribution of the number of shifts is distinctly decoupled from the prior (Fig. 1). A larger

magnitude on the prior on the expected number of shifts is less restrictive (Rabosky *et al.*, 2017), and as expected, leads to the recognition of a larger number of shifts in the posterior distribution, each with a lower frequency (Fig. 1). Nevertheless, shifts that are highly supported  
275 by the data, as indicated by their MOR, are largely congruent among the six analyses (Tables S3, S4).

As the MOR allows to distinguish shifts that are strongly supported by the data, but cannot indicate the number of significant shifts in an analysis, we chose to discuss those shifts that, first, in any given analysis have a MOR that falls within the 95% of the maximum MOR  
280 value identified in that analysis; and, from the previous set, those that are shared among at least four of the six analyses. We identified 30 such shifts, and consider them as the core diversifications to be discussed (Tables 1, S4). In each analysis, the distribution of shifts sorted by their MOR is a hollow curve (Fig. S2, Table S5). Eighteen core shifts are distributed on single branches, and twelve drift in two or more adjacent branches, within a particular phylogenetic  
285 region (Fig. 2, Table S4). Twenty-six core shifts are towards increased diversification rates; three core shifts contain many nested shifts, and only one core shift is towards decreased diversification (Figs. 2, 3).

**Angiosperm Diversification.** The onset of angiosperm diversification into extant lineages in the  
290 Early Cretaceous was soon followed by the differentiation of Mesangiospermae (Cantino *et al.*, 2007) – a clade that contains the vast majority of angiosperm’s diversity, morphological variety and ecological breadth – and its diversification into five evolutionary lineages, including the Magnoliidae (magnoliids), Monocotyledoneae (monocots), and Eudicotyledoneae (eudicots). Most eudicots belong to the large clade Pentapetalae (Cantino *et al.*, 2007) which in turn is  
295 composed of Superrosids and Superasterids (APG IV, 2016; Fig. 2). Together, monocots, Superrosids, and Superasterids include approximately 95% of living angiosperm species.

Core diversification shifts are distributed all across the angiosperm phylogeny, and took place between the Early Cretaceous (Valanginian) to the latest Eocene (Priabonian) or earliest Oligocene (Rupelian), spanning a period of over 100 million years (Fig. 2). Six core diversification  
300 shifts took place in the Early Cretaceous. The first is approximately associated with the origin of

Mesangiospermae (1a-1b; Tables 1, S4), and is followed by shifts along the spine of Superrosids, including one on the branch subtending Rosids (2), and another spanning from Fabids to a clade formed by Oxalidales and Malpighiales (3a-3d). Each of these three core shifts contain many nested shifts. Later during the Early Cretaceous one shift took place within Asterids, subtending  
305 Ericales (4); another one within Rosids, in Malvids, subtending Myrtales (5), and a third one within monocots, subtending a clade approximately corresponding to Commelinids (6, Fig. 2, Tables 1, S4). Unless otherwise noted, all shifts represent increasing diversification.

During the Late Cretaceous, 15 core shifts gave rise to clades within eudicots and monocots. The earliest shift took place within eudicots, corresponding approximately to  
310 Ranunculaceae (7a-7b). All other eudicot shifts are nested in Pentapetalae. Within Superrosids, there was shift in Saxifragales, subtending Crassulaceae (17); another one within Malvids, corresponding approximately to Sapindales (11a-11b); and three shifts within Fabidae: approximately Fabaceae (9a-9b), Moraceae plus Urticaceae (18), and approximately Euphorbiaceae (21a-21b). Within Superasterids, one shift took place in Caryophyllales,  
315 subtending Polygonaceae plus Plumbaginaceae (12); two shifts in Lamiidae, corresponding to a clade containing Solanales, Gentianales, Boraginales, and Lamiales (8), and nested within it, a shift towards decreased diversification in a clade formed by Montiniaceae, Hydroleaceae, and Sphenocleaceae (15); and three shifts in Campanulidae: approximately Asteraceae (13a-13c), Dipsacales (14), and approximately Apiales (19a-19b). Three shifts took place within monocots:  
320 a clade containing Asparagaceae and five additional families (10), Orchidaceae (16), and approximately Cyperaceae (20a-20b; Fig. 2, Tables 1, S4).

Nine core shifts took place during the Paleogene. Within Rosids there were two shifts in Malvids, corresponding approximately to Brassicaceae (26a-26b), and approximately to Malvaceae (29a, 29b); and two shifts in Fabidae: Celastraceae (23) and Cucurbitaceae (28).  
325 There were two shifts in Superasterids, both within Caryophyllales, corresponding to Amaranthaceae (24), and approximately to Cactaceae (30a-30b). There was a single shift within Asterids, in Campanulids, subtending Campanulaceae (22), and also a single shift within monocots, corresponding to Poaceae (27). A single core shift was detected within magnoliids, subtending Piperaceae (25; Fig. 2, Tables 1, S4). However, two additional strong diversification

330 increases, both within magnoliids, are noticeable in the phylogram (Fig. 2), corresponding to Annonaceae (Magnoliales) and to a clade that includes *Cinnamomum*, *Sassafras* and *Laurus*, within Lauraceae (Laurales). These diversification increases were not identified as core shifts according to the delimiting criteria.

Shift times and diversification parameters of angiosperms as a whole, and of the 30 core  
335 shifts, estimated in analyses with different prior for the number of expected shifts are very similar (Tables S3, S4). We discuss diversification parameters and times derived from the analysis with the prior for expected number of shifts equal to 100 because it includes the 30 core shifts selected through our combined criteria (Table 1). Estimated speciation ( $\lambda$ ) and extinction ( $\mu$ ) rates for angiosperms as a whole are 0.0988 (0.0910-0.1086) and 0.0277 (0.0192-  
340 0.0384), respectively, which are congruent with previous estimates (Magallón & Sanderson, 2001).

Diversification-through-time (DTT) plots for angiosperms as a whole estimated with different values for the prior on the expected number of shifts are virtually equal. The rate of diversification is modelled as having undergone a moderate early decline (ca. 140-100 Ma),  
345 followed by stabilization (ca. 100-50 Ma) and moderate increase towards the present (Fig. 2). Speciation and extinction rates are modelled as having a pronounced increase towards the present (Fig. 2). Individual shift clades have widely varying increasing or decreasing DTT trajectories, which overlap through time (Fig. 3).

## 350 Discussion

**Implications of backbone sampling.** The identified shifts provide information of major diversification changes for angiosperms as a whole at a deep phylogenetic scale. They represent an important starting point to understand major features of angiosperm evolution (Uyeda *et al.*, 2017). The phylogenetic level at which shifts were identified is a function of the used  
355 backbone sampling, in which major angiosperm lineages were represented by a small number of placeholders, which convey limited information about species richness distributed among and within angiosperm clades. The taxonomic selection in the dated phylogenetic tree aimed to represent, as much as possible, all angiosperm clades recognized as families. This type of

selection results in a highly biased depiction of species distribution, as members of very small  
360 clades, with a very low probability of being represented under random sampling, were  
selectively sampled. Each family, regardless of its species richness, is represented by a similar  
number of placeholders, which correspond to very different proportions of the total species  
richness in each clade. This biased sampling is necessary if as many as possible angiosperm  
families are to be included, but has important consequences when attempting to estimate  
365 macroevolutionary parameters. To mitigate the effect of biased sampling, we specified clade-  
specific sampling fractions in diversification analyses. Sampling fractions varied widely, from 1.0  
(e.g., Amborellaceae, Trochodendraceae, Eucommiaceae), to  $<0.0003$  (e.g., Rubiaceae,  
Lamiaceae, Orchidaceae; Table S2). Not many viable alternatives are available. Ideally, the  
difference in sampling fractions among clades could be reduced by very greatly increasing  
370 sampling within large families, although this strategy might be limited by molecular data  
availability, and contingent on the capability of models and computer power to handle  
taxonomically massive datasets in macroevolutionary analyses. Another potential strategy is to  
implement random sampling among angiosperms, but after including representatives of clades  
unlikely to be sampled randomly due to their small size (e.g., O'Meara *et al.*, 2016).  
375 Bioinformatic methods to incorporate missing taxa into backbone phylogenies are available  
(e.g., PASTIS, Thomas *et al.*, 2013), but given the colossal species richness of many angiosperm  
families, and the very small number of placeholders in the phylogenetic backbone, we suspect  
this type of approach would be unfeasible in this study.

As a consequence of extremely reduced sampling, estimates of diversification dynamics  
380 can only associate shifts to major clades, usually on their stem lineage, as information (i.e.,  
species sampling) that could document one or more shifts within the clade is lacking. The  
reduced taxonomic sampling also precludes replicating diversification shifts detected in studies  
focused on delimited, and much more densely sampled clades (e.g., Lagomarsino *et al.*, 2016).  
The absence of diversification shifts younger than the Paleogene may also be a consequence of  
385 sparse taxonomic sampling.

**Previous Angiosperm Diversification Studies.** Few previous studies have investigated long term angiosperm diversification dynamics, in particular, identifying diversification shifts (Table 2). Davies and collaborators (Davies *et al.*, 2004) conducted the first study to identify  
390 diversification shifts at an angiosperm-wide scale, using a family-level supertree, in which diversification shifts were approximated with species richness imbalance among families (Fusco & Cronk, 1995; Purvis *et al.*, 2001), from which they detected the most (top ten) imbalanced family pairs. Of these, five may correspond to shifts detected in our study (Table 2). Smith and collaborators (Smith *et al.*, 2011) applied SymmeTREE (Chan & Moore, 2005) – a method that  
395 considers the topological distribution of species richness to fit models of constant or variable rates (Chan & Moore, 2002) – to an angiosperm megaphylogeny. They identified between 16 and >2700 potential shifts, which were not named. The closest precedent to our study is the analysis of Tank and collaborators (Tank *et al.*, 2015), who investigated links between diversification shifts and whole genome duplications, by applying MEDUSA (Alfaro *et al.*, 2009)  
400 – a maximum likelihood stepwise method to identify the best-fitting diversification model and detect significant shifts in diversification and relative extinction – to a set of bootstrapped chronograms representing 325 angiosperm families. Over 140 unique shifts were identified across all bootstrapped chronograms, 27 of which occurred in at least 75% of all the set (Table 2 in Tank *et al.*, 2015). Of these, nine are approximately equivalent to shifts detected here (Table  
405 2). In spite of some profound sampling and methodological differences, as well as analytical limitations associated to each method, it is noteworthy that these studies detect partially overlapping sets of diversification shifts, the most recurrent ones being associated to Piperaceae, Asparagaceae and related families, a clade containing Arecales, Commelinales and Zingiberales, Cyperaceae, Poaceae, Cactaceae, ca. Lamiidae, Asteraceae, Myrtaceae,  
410 Brassicaceae, and Fabaceae.

**Phylogenetic placement of radiations** The unequal distribution of species richness among lineages in different biological groups has for long attracted the interest of evolutionary biologists. Angiosperms are an emblematic example, in which clades exhibit pronounced  
415 differences in the number of extant species they contain. This study conclusively confirms

previous suggestions (Magallón & Sanderson, 2001; Davies *et al.*, 2004; Tank *et al.*, 2015) that angiosperm megadiversity is not directly associated with the origin of angiosperms as a whole, but rather, results from several independent diversification shifts within the clade, and goes beyond by identifying particular phylogenetic regions in which diversification shifts have taken place, documenting a complex pattern of temporally overlapping radiations and depletions in different lineages that result in present-day distribution of species richness across angiosperms.

Most core shifts subtend species-rich clades identified as distinct botanical orders and families that, while containing wide disparity in morphology and ecological function, are nevertheless each characterized by a distinctive combination of vegetative attributes and/or reproductive groundplans (e.g., Fabaceae, Asteraceae, Orchidaceae, Poaceae; Table 1). The placement of diversification shifts associated with distinct groundplans suggests that diversification shifts are associated with the evolution of integrated morphological combinations that achieve particular complex functions (O'Meara *et al.*, 2016). Nevertheless, as discussed above, the sparse taxonomic sample in this study, in which massive clades are represented by only a few species, precludes detecting radiations that might have taken place within those clades.

The finding of shifts on adjacent branches is technically consistent with the fact that shifts identified in different configurations by the CPP in BAMM are not independent from each other, but most likely represent a shift detected with moderate marginal probabilities on adjacent branches (Rabosky, 2017).

**Have there been diversification decreases in angiosperm evolution?** The extraordinary present-day diversity of angiosperms makes it easy to overlook that some angiosperm lineages may be in decline. Our results document that, while some lineages within angiosperms represent exceptional evolutionary radiations, others are decreasing. Diversification through time plots show that lineages within angiosperms underwent independent radiations and depletions at different times, which overlapped and masked each other, suggesting that different lineages were predominant at different times through angiosperm history (Fig. 3).



Our results show pronounced variations in the rates of diversification among  
445 angiosperm lineages (Table S3). Many high rate clades derive from distinct diversification shifts,  
and are scattered across the phylogeny (Fig. 2). We observe that lineages with low  
diversification rates occupy two distinct types positions in the phylogeny: There are low  
diversification grades that subtend large clades with high diversification rates. These grades  
correspond to the depauperons discussed by Donoghue and Sanderson (2015). There are also  
450 isolated low diversification branches (or small clades) embedded within a speciose clade  
characterized by high diversification rate. We hypothesize that low diversification lineages in  
these two distinct phylogenetic positions result from differential evolutionary situations, and  
are characterized by distinct diversification dynamics. The low diversification grades have been  
explained as branches that differentiated before the evolution or during the assembly of traits  
455 or conditions associated with the increased diversification of the speciose sister clade  
(Donoghue & Sanderson, 2015). Thus, the rates of low diversification grades possibly represent  
retained plesiomorphic conditions. On the other hand, isolated low diversification branches are  
probably outcomes of diversification shifts towards decreasing rates that affected that  
particular branch. In fact, the single decreasing core diversification shift detected in this study  
460 (core shift 15, Fig. 2, Table 1) is associated with an isolated low diversification clade (i.e.,  
Montiniaceae, Sphenocleaceae, Hydroleaceae), within a high diversification, speciose clade  
(i.e., Lamiidae). Although only one isolated low diversification clade was identified as resulting  
from a core shift, many others can be identified in the phylorate plot (e.g., Plocospermataceae,  
Roridulaceae, Barbeyaceae-Dirachmaceae, Goupiaceae; Fig. 2).

465 The relatively few detected diversification decreases probably do not reflect the paucity  
of lineages in decline, but rather, as the natural ultimate outcome of decreasing diversification  
is extinction, lineages undergoing an evolutionary depletion persist shortly. Detection of recent  
diversification decreases is more likely, appearing as depauperate lineages on their way to  
extinction. Plocospermataceae, the sister group to the remainder of Lamiales, is a possible  
470 example (Fig. 2). Lineages that underwent an ancient diversification decrease but survive to the  
present are unexpected and difficult to explain (Strathmann & Slatkin, 1983; Magallón &  
Sanderson, 2001). These lineages might be in decline from former megadiversity and ultimate

demise is taking longer, or they might have recovered after a drastic decrease. The clade containing Monitiniaceae, Hydroleaceae and Spehncleaceae (Fig. 2, shift 15) is a possible  
475 example.

**Are angiosperms in decline?** Previous work (Vamosi & Vamosi, 2011) has suggested that extrinsic factors can set limits to angiosperm diversification. The long-term diversification trajectory of angiosperms modelled here includes a stable to slightly increasing trend towards  
480 the present. This sustained diversification trajectory indicates that angiosperms as a whole are not undergoing a diversification decline, but rather that species-richness will continue to accumulate. The trends of increasing speciation and extinction (Fig. 2) imply a higher species turnover. Although angiosperms are today the most diverse group of plants in terrestrial ecosystems, where they display exceptional morphological, functional and ecological  
485 complexity and innovation, the estimated diversification trajectory indicates that angiosperm evolutionary expansion remains unmitigated. The existence of limits to species accumulation in angiosperm as a whole remains to be evaluated, but our results suggest that if such limits exist, they have not yet been reached. These results are congruent with the finding of a non-equilibrium phase in the acquisition of floral structure diversity associated with increasing  
490 diversification rates (O'Meara *et al.*, 2016).

Angiosperm DTT plots were here modelled considering a sample of lineages that diverged tens of million of years ago, and as such, cannot predict potential changes in trajectory in response to drastic environmental changes (e.g., climate change) that were not modelled in the simulation. These plots could be complemented with graphs estimated with methods that  
495 can directly incorporate the fossil record (Stadler, 2011), or information about relevant paleoenvironmental variables, such as temperature (Condamine *et al.*, 2013; Sauquet & Magallón, in review).

**Are there phylogenetic regions or times in which diversification increases or decreases are concentrated?** The origin of angiosperm megadiversity cannot be traced to a few events or to a  
500 restricted time interval, but rather, results from many independent diversification shifts

through most of its evolutionary history and across its phylogenetic spectrum. Namely, a concentration of diversification shifts in response to major global events such as the K/T mass extinction of the end-Eocene cooling event is not observed. While floristic shifts are detected in  
505 local paleofloras (Nichols & Johnson, 2008; Barreda *et al.*, 2012), the absence of a distinct concentration of diversification shifts, or marked changes in direction in DTT plots around any particular time suggests that responses in angiosperm composition to global events most likely took place at lower phylogenetic scales.

510 **Perspectives and Emerging Questions.** In this study, we detected diversification shifts at a deep macroevolutionary level. The identified diversification shifts represent clues to recognizing possible causes and ultimate drivers of megadiversity, which likely combined intrinsic attributes, ecological functions and abiotic conditions. Most variables that have been postulated as drivers of angiosperm diversification are complex structures and functions  
515 resulting from additive integration of simpler attributes through the phylogenetic history of different lineages (O'Meara *et al.*, 2016). The clades here detected as resulting from diversification increases lack shared potential “key attributes” that could commonly underlie their respective diversifications. Furthermore, each of these clades includes many intrinsic attributes deployed in a great variety of extrinsic conditions that could potentially be related  
520 with increased diversification (Sauquet & Magallón, in review). While this study is not intended to recognize the causal factors underlying angiosperm diversification, it provides a critical framework (Uyeda *et al.*, 2017) by pointing to particular phylogenetic regions to investigate for diversification associated to intrinsic or extrinsic factors (Bouchenak-Khelladi *et al.*, 2015). A further improved understanding of angiosperm radiations, and of the causes that drive them,  
525 should necessarily be based on a more precise phylogenetic location of incremental and decremental diversification shifts, derived from a much denser taxonomic sampling, namely species-level phylogenies, and ideally, direct integration of fossil information.

## Acknowledgements

530 We thank H. Sauquet, A. Benítez-Villaseñor, R. Hernández-Gutiérrez, A. López-Martínez and S.  
Ramírez-Barahona for comments. G. Ortega-Leite, A. Wong-León, J.C. Montero-Rojas, D.  
Martínez-Almaguer and A. Luna provided technical assistance. LLSR thanks the Consejo  
Nacional de Ciencia y Tecnología México for a scholarship (CONACyT 262540), and the Posgrado  
535 thanks the Dirección General de Asuntos del Personal Académico, UNAM, for postdoctoral  
funding.

### Author Contributions

SM designed research; SM and LLSR performed research; SLGA and LLSR contributed data; SM  
540 and LLSR analysed data; SM, with contributions of LLSR, wrote the paper.

### References

- Alfaro ME, Santini F, Brock C, Alamillo H, Dornburg A, Rabosky, Carnevale G, Harmon LJ. 2009.  
Nine exceptional radiations plus high turnover explain species diversity in jawed  
545 vertebrates. *Proceedings of the National Academy of Sciences of the United States of  
America* 106: 13410-13414.
- APG IV. 2016. An update of the Angiosperm Phylogeny Group classification for the orders and  
families of flowering plants: APG IV. *Botanical Journal of the Linnean Society* 181: 1-20.
- Barreda VD, Cúneo NR, Wilf P, Currano ED, Scasso RA, Brinhuis H. 2012. Cretaceous/Paleogene  
550 floral turnover in Patagonia: drop in diversity, low extinction, and a Classopolis spike. *PLOS  
One* 7: e52455.
- Bouchenak-Khelladi Y, Onstein RE, Xing Y, Schwery O, Linder HP. 2015. On the complexity of  
triggering evolutionary radiations. *New Phytologist* 207: 313-326.
- Brenner G. 1996. Evidence for the earliest stage of angiosperm pollen evolution: a  
555 paleoequatorial section from Israel. In: Taylor D, Hickey L, eds. *Flowering plant origin,  
evolution and phylogeny*. New York, USA: Chapman & Hall, 91–115.
- Cantino P, Doyle J, Graham S, Judd W, Olmstead R, Soltis D, Soltis P, Donoghue M. 2007.  
Towards a phylogenetic nomenclature of Tracheophyta. *Taxon* 56: 1599–1613.

- Cardinal S, Danforth B. 2013. Bees diversified in the age of eudicots. *Proceedings of the Royal Society of London B* 280: 2012–2686.
- 560
- Chan KMA, Moore BR. 2002. Whole-tree methods for detecting differential diversification rates. *Systematic Biology* 51: 855-865.
- Chan KMA, Moore BR. 2005. SymmeTREE: whole-tree analysis of differential diversification rates. *Bioinformatics* 21: 1709-1710.
- 565
- Christenhusz MJM, Byng JW. 2016. The number of known plants species in the world and its annual increase. *Phytotaxa* 261: 201-217.
- Condamine FL, Rolland J, Morlon H. 2013. Macroevolutionary perspectives to environmental change. *Ecology Letters* 16: 72-85.
- Davies TJ, Barraclough TG, Chase MW, Solits PS, Soltis DE, Savolainen V. 2004. Darwin's
- 570
- abominable mystery: insights from a supertree of the angiosperms. *Proceedings of the National Academy of Sciences of the United States of America* 101: 1904-1909.
- Donoghue MJ, Sanderson MJ. 2015. Confluence, synnovation, and depauperons in plant diversification. *New Phytologist* 207: 260-274.
- Doyle J, Biens P, Doerenkamp A, Jardiné S. 1977. Angiosperm pollen from the pre-Albian Lower
- 575
- Cretaceous of equatorial Africa. *Bulletin Centres Recherches Exploration-Production Elf-Aquitaine* 1: 451–473.
- Drummond A, Ho S, Phillips M, Rambaut A. 2006. Relaxed phylogenetics and dating with confidence. *PLOS Biology* 4: e88.
- Edgar R. 2004. MUSCLE: multiple sequence alignment with high accuracy and high throughput.
- 580
- Nucleic Acids Research* 32: 1792–1797.
- Eklund H, Doyle J, Herendeen P. 2004. Morphological phylogenetic analysis of living and fossil Chloranthaceae. *International Journal of Plant Sciences* 165: 107–151.
- Farrell BD, Dussourd DE, Mitter C. 1991. Escalation of plant defense: do latex and resin canals spur plant diversification? *American Naturalist* 138: 881-900.
- 585
- Friis EM, Pedersen K, von Balthazar M, Grimm GW, Crane PR. 2009. *Monetianthus mirus* gen. et sp. nov., a nymphaealean flower from the Early Cretaceous of Portugal. *International Journal of Plant Sciences* 170: 1086–1101.

- 590 Friis EM, Pedersen KR, Crane PR. 2004. Araceae from the Early Cretaceous of Portugal: evidence on the emergence of monocotyledons. *Proceedings of the National Academy of Sciences of the United States of America* 101: 16565–16570.
- Fusco G, Cronk QCB. 1995. A new method for evaluating the shape of large phylogenies. *Journal of Theoretical Biology* 175: 235-243.
- Goffredi SK, Kantor AH, Woodside WT. 2011. Aquatic microbial habitats within a Neotropical rainforest: Bromeliads and pH-associated trends in bacterial diversity and composition. 595 *Microbial Ecology* 61: 529-542.
- Guzmán B, Lachance M-A, Herrera CM. 2013. Phylogenetic analysis of the angiosperm-floricolous insect-yeast association: have yeast and angiosperm lineages co-diversified? *Molecular Phylogenetics and Evolution* 68: 161-175.
- Hall T. 1999. BioEdit: a user-friendly biological sequence alignment editor and analysis program 600 for Windows 95/98/NT. *Nucleic Acids Symposium Series* 41: 95–98.
- Herendeen PS, Friis EM, Pedersen KR, Crane PR. 2017. Palaeobotanical redux: revisiting the age of the angiosperms. *Nature Plants* 3: 17015
- Hughes CE, Atchison GW. 2015. The ubiquity of alpine plant radiations: from the Andes to the Hengduan Mountains. *New Phytologist* 207: 275-282.
- 605 Hughes N, McDougall A, Chapman J. 1991. Exceptional new record of Cretaceous Hauterivian angiospermid pollen from southern England. *Journal of Micropalaeontology* 10: 75–82.
- Hughes N, McDougall A. 1987. Records of angiospermid pollen entry into the English Early Cretaceous succession. *Review of Palaeobotany and Palynology* 50: 255–272.
- Joppa LN, Roberts DL, Pimm SL. 2010. How many species of flowering plants are there? 610 *Proceedings of the Royal Society of London B* 267: 42-48.
- Kraichak E, Divakar PK, Crespo A, Leavitt SD, Nelsen MP, Lücking R, Lumbsch HT. 2015. A tale of two hyper-diversities: diversification dynamics of the two largest families of lichenized fungi. *Scientific Reports* 5: 10028.
- Laenen B, Shaw B, Schneider H, Goffinet B, Paradis E, Désamoré A, Heinrichs J, Villareal JC, 615 Gradstein SR, McDaniel SF, et al. 2014. Extant diversity of bryophytes emerged from successive post-Mesozoic diversification bursts. *Nature Communications* 5: 5134.

- Lagomarsino LP, Condamine FL, Antonelli A, Mulch, Davis CC. 2016. The abiotic and biotic drivers of rapid diversification in andean bellflowers (Campanulaceae). *New Phytologist* 210: 1430-1442.
- 620 Magallón S, Gómez-Acevedo S, Sánchez-Reyes LL, Hernández-Hernández T. 2015. A metacalibrated time-tree documents the early rise of flowering plant phylogenetic diversity. *New Phytologist* 207: 437-453.
- Magallón S, Hilu K, Quandt D. 2013. Land plant evolutionary timeline: gene effects are secondary to fossil constraints in relaxed clock estimation of age and substitution rates. *American Journal of Botany* 100: 556–573.
- 625 Magallón S, Sanderson MJ. 2001. Absolute diversification rates in angiosperm clades. *Evolution* 55: 1762-1780.
- Marshall C. 2008. A simple method for bracketing absolute divergence times on molecular phylogenies using multiple fossil calibration points. *American Naturalist* 171: 726–742.
- 630 Mitchell JS, Rabosky DL. 2017. Bayesian model selection with BAMM: effects of the model prior on the inferred number of diversification shifts. *Methods in Ecology and Evolution* 8: 37-46.
- Mohr B, Bernardes-de-Oliveira M. 2004. *Endressinia brasiliana*, a magnolialean angiosperm from the lower Cretaceous Crato Formation (Brazil). *International Journal of Plant Sciences* 165: 1121–1133.
- 635 Moore BR, Donoghue MJ. 2007. Correlates of diversification in the plant clade Dipsacales: geographic movement and evolutionary innovations. *American Naturalist* 170: S38-S65.
- Moore BR, Höhna S, May MR, Rannala B, Huelsenbeck JP. 2016. Critically evaluating the theory and performance of Bayesian analysis of macroevolutionary mixtures. *Proceedings of the National Academy of Sciences of the United States of America* 113: 9569-9574.
- 640 Morlon H, Parsons T, Plotkin J. 2011. Reconciling molecular phylogenies with the fossil record. *Proceedings of the National Academy of Sciences of the United States of America* 108: 16327-16332.
- Morlon H, Lewitus E, Condamine FL, Manceau M, Clavel J, Drury J. 2016. RPANDA: an R package for macroevolutionary analyses on phylogenetic trees. *Methods in Ecology and Evolution* 7: 589-597.
- 645

- Nichols DJ, Johnson KR. 2008. *Plants and the K-T Boundary*. Cambridge, UK: Cambridge University Press.
- O'Meara BC, Smith SD, Armbruster SW, Harder LD, Hardy CR, Hileman LC, Hufford L, Litt A, Magallón S, Smith SA, Stevens PF, et al. 2016. Non-equilibrium dynamics and floral traits interactions shape extant angiosperm diversity. *Proceedings of the Royal Society of London B* 283: 20152304.
- 650
- Purvis A, Katzourakis A, Agapow PM. 2002. Evaluating phylogenetic tree shape: two modifications to Fusco & Cronk's method. *Journal of Theoretical Biology* 214: 99-103
- Rabosky DL, Donnellan SC, Grudler M, Lovette IJ. 2014. Analysis and visualization of complex macroevolutionary dynamics: an example from Australian scincid lizards. *Systematic Biology* 63: 610-627.
- 655
- Rabosky DL, Mitchell JS, Chang J. 2017. Is BAMM flawed? Theoretical and practical concerns in the analysis of multi-rate diversification models. *Systematic Biology* 66: 477-498.
- Rabosky DL. 2014. Automatic detection of key innovations, rate shifts, and diversity-dependence on phylogenetic trees. *PLOS One* 9: e89543.
- 660
- Rabosky DL. 2017. BAMM Documentation. URL <http://bamm-project.org/documentation.html>.
- Rambaut, A, Suchard MA, Xie, D Drummond AJ. 2014. Tracer 1.6. URL <http://tree.bio.ed.ac.uk/software/tracer/>.
- Rubinstein CV, Gerriene P, de la Puente GS, Astini RA, Steemans P. 2010. Early Middle Ordovician evidence for land plants in Argentina (eastern Gondwana). *New Phytologist* 188: 365-369.
- 665
- Sanderson MJ, Donoghue MJ. 1994. Shifts in diversification rate with the origin of angiosperms. *Science* 264: 1590-1593.
- Sargent RD. 2004. Floral symmetry affects speciation rates in angiosperms. *Proceedings of the Royal Society of London B* 271: 603-608.
- 670
- Sauquet H, Magallón S. 2018. Key questions and challenges in angiosperm macroevolution. *New Phytologist*, in review.
- Schneider H, Schuettpelz E, Pryer K, Cranfill R, Magallón S, Lupia R. 2004. Ferns diversified in the shadow of angiosperms. *Nature* 428: 553-557.



- 675 Shi JJ, Rabosky DL. 2015. Speciation dynamics during the global radiation of extant bats.  
Evolution 69: 1528-1545.
- Slowinski JB, Guyer C. 1993. Testing whether certain traits have caused amplified  
diversification: an improved method based on a model of random speciation and  
extinction. American Naturalist 142: 1019-1024.
- 680 Smith SA, Beaulieu JM, Stamatakis A, Donoghue MJ. 2011. Understanding angiosperm  
diversification using small and large phylogenetic trees. American Journal of Botany 98:  
404-414.
- Soltis DE, Smith SA, Cellinese N, Wurdack K, Tank D, Brockington S, Refulio-Rodriguez N, Walker  
J, Moore M, Carlswald B, et al. 2011. Angiosperm phylogeny: 17 genes, 640 taxa. American  
685 Journal of Botany 98: 704–730.
- Spriggs EL, Clement WL, Sweeney PW, Madriñán S, Edwards EJ, Donoghue MJ. 2015. Temperate  
radiations and dying embers of a tropical past: the diversification of Viburnum. New  
Phytologist 207: 340-354.
- Stadler T. 2011. Mammalian phylogeny reveals recent diversification rate shifts. Proceedings of  
690 the National Academy of Sciences of the United States of America 108: 6187-6192.
- Stamatakis A. 2006a. RAxML-VI-HPC: maximum likelihood-based phylogenetic analyses with  
thousands of taxa and mixed models. Bioinformatics 22: 2688–2690.
- Stamatakis A. 2006b. Phylogenetic models of rate heterogeneity: a high performance  
computing perspective. Proceedings of 20th IEEE International Parallel and Distributed  
695 Processing Symposium (IPDPS3006), Rhodos, Greece.
- Stamatakis A. 2008. A rapid bootstrap algorithm for the RAxML web servers. Systematic Biology  
57: 758–771.
- Stebbins GL. 1974. Flowering plants: Evolution above the species level. Cambridge, MA, USA:  
Harvard University Press.
- 700 Stevens PF. 2013. Angiosperm phylogeny website. Version 12, July 2012 [and more or less  
continuously updated since]. URL <http://www.mobot.org/MOBOT/research/APweb/>.
- Strathmann RR, Slatkin M. 1983. The improbability of animal phyla with few species.  
Paleobiology 9: 97-106.

- Tank DC, Eastman JM, Pennell MW, Soltis PS, Soltis DE, Hinchliff CE, Brown JB, Sessa EB,  
705 Harmon LJ. 2015. Nested radiations and the pulse of angiosperm diversification: increased  
diversification rates often follow whole genome duplications. *New Phytologist* 207: 454-  
467.
- The Plant List - a working list of all plant species. 2017. URL <http://www.theplantlist.org/>.
- Thomas GH, Hartmann K, Jetz W, Joy JB, Mimoto A, Mooers A. 2013. PASTIS: an R package to  
710 facilitate phylogenetic assembly with soft taxonomic inferences. *Methods in Ecology and  
Evolution* 4: 1011-1017.
- Uyeda JC, Zenil-Ferguson R, Pennell MW. 2017. Rethinking phylogenetic comparative methods.  
BioRxiv Nov. 21, 2017. URL doi: <http://dx.doi.org/10.1101/222729>.
- Vamosi J, Vamosi SM. 2011. Factors influencing diversification in angiosperms: at the  
715 crossroads of intrinsic and extrinsic traits. *American Journal of Botany* 98: 460-471.
- van der Niet T, Johnson SD. 2012. Phylogenetic evidence for pollinator-driven diversification of  
angiosperms. *TrEE* 27: 353-361.
- Wang B, Zhang H, Jarzembowski EA. 2013. Early Cretaceous angiosperms and beetle evolution.  
*Frontiers in Plant Sciences* 4: 3.
- 720 Weber MG, Agrawal AA. 2014. Defense mutualisms enhance plant diversification. *Proceedings  
of the National Academy of Sciences of the United States of America* 111: 16442-16447.

**Table 1.** Thirty core angiosperm rate shifts. Core shifts correspond to those within 95% of the magnitude of the highest Marginal Odds Ratio (MOR) in each analysis with different prior for the expected number of shifts (i.e., 0.1, 1, 5, 10, 50, 100); and that are found in at least four (out of six) analyses. Core shifts detected on two or more adjacent branches are indicated as “ca. clade name”.

| Core Shift Number | Core Shift Name                              | Clade Content                                                                           | Mean Time of Shift (min-max) Ma |
|-------------------|----------------------------------------------|-----------------------------------------------------------------------------------------|---------------------------------|
| 1                 | ca. Mesangiospermae                          | Nymphaeales, Austrobaileyales, Mesangiospermae                                          | 139.17 (138.97-139.40)          |
| 2                 | Vitales + Rosids                             | Vitales, Rosidae                                                                        | 121.98 (121.32-122.40)          |
| 3                 | ca. Fabidae                                  | Fabidae                                                                                 | 117.68 (116.81-118.58)          |
| 4                 | Ericales                                     | Ericales                                                                                | 107.76 (103.59-112.34)          |
| 5                 | Myrtales                                     | Myrtales                                                                                | 105.45 (96.64-116.37)           |
| 6                 | Arecales + Commelinales + Zingiberales       | Arecales, Commelinales, Zingiberales                                                    | 102.14 (98.21-106.73)           |
| 7                 | ca. Ranunculaceae                            | Menispermaceae, Berberidaceae, Ranunculaceae                                            | 93.78 (89.93-98.17)             |
| 8                 | Lamiidae                                     | Gentianales, Solanales, Boraginales, Lamiales                                           | 91.14 (89.75-92.67)             |
| 9                 | ca. Fabaceae                                 | Fabaceae                                                                                | 88.05 (84.76-92.13)             |
| 10                | Asparagaceae+                                | Tecophilaceae, Iridaceae, Asphodelaceae, Xanthorrhoeaceae, Amarillidaceae, Asparagaceae | 84.25 (80.66-88.94)             |
| 11                | ca. Sapindales                               | Sapindales excluding Biebersteiniaceae and Nitrariaceae                                 | 81.50 (79.92-83.35)             |
| 12                | Polygonaceae + Plumbaginaceae                | Polygonaceae, Plumbaginaceae                                                            | 76.87 (67.91-93.26)             |
| 13                | ca. Asteraceae                               | Stylidaceae, Menyanthaceae, Goodeniaceae, Calyceraceae, Asteraceae                      | 76.79 (76.48-77.10)             |
| 14                | Dipsacales                                   | Dipsacales                                                                              | 75.76 (70.94-81.84)             |
| 15                | Montiniaceae + Hydroleaceae + Sphenocleaceae | Montiniaceae, Hydroleaceae, Sphenocleaceae                                              | 75.76 (72.04-79.24)             |
| 16                | Orchidaceae                                  | Orchidaceae                                                                             | 73.07 (59.75-108.78)            |

|    |                       |                                                         |                     |
|----|-----------------------|---------------------------------------------------------|---------------------|
| 17 | Crassulaceae          | Crassulaceae                                            | 72.91 (60.69-95.33) |
| 18 | Moraceae + Urticaceae | Moraceae, Urticaceae                                    | 70.93 (68.52-73.43) |
| 19 | ca. Apiales           | Pittosporaceae, Araliaceae, Myodocarpaceae,<br>Apiaceae | 66.28 (63.37-70.53) |
| 20 | ca. Cyperaceae        | Juncaceae, Cyperaceae                                   | 62.74 (55.19-77.05) |
| 21 | ca. Euphorbiaceae     | Euphorbiaceae excluding <i>Neoscortechinia</i>          | 59.34 (57.09-61.88) |
| 22 | Campanulaceae         | Campanulaceae                                           | 54.34 (45.59-75.98) |
| 23 | Celastraceae          | Celastraceae excluding Parnassia                        | 51.15 (42.83-68.40) |
| 24 | Amaranthaceae         | Amaranthaceae                                           | 51.01 (43.67-64.07) |
| 25 | Piperaceae            | Piperaceae                                              | 48.79 (39.37-65.47) |
| 26 | ca. Brassicaceae      | Capparaceae, Brassicaceae, Cleomaceae                   | 47.96 (44.22-54.18) |
| 27 | Poaceae               | Poaceae                                                 | 45.27 (39.75-58.45) |
| 28 | Cucurbitaceae         | Cucurbitaceae                                           | 42.61 (35.54-57.08) |
| 29 | ca. Malvaceae         | Malvaceae                                               | 39.53 (33.31-59.69) |
| 30 | ca. Cactaceae         | Portulacaceae, Cactaceae                                | 30.80 (28.82-33.29) |

**Table 2.** Published studies identifying angiosperm diversification shifts. Comparative summary of published studies in which shifts in the rate of diversification within angiosperms have been identified.

|                 | <b>Davies <i>et al.</i>, 2004</b>                                                                       | <b>Smith <i>et al.</i>, 2011</b>     | <b>Tank <i>et al.</i>, 2015</b>                                    | <b>This study</b>                                                                                 |
|-----------------|---------------------------------------------------------------------------------------------------------|--------------------------------------|--------------------------------------------------------------------|---------------------------------------------------------------------------------------------------|
| Phylogeny       | Supertree from 46 source trees                                                                          | ML megaphylogeny                     | ML phylogram obtained from each of >1000 bootstrap datasets        | ML phylogram                                                                                      |
| Terminals       | Not specified                                                                                           | 55,473                               | 325                                                                | 799                                                                                               |
| Sequence data   | Not applicable (branch lengths on supertree were optimized a posteriori from <i>rbcL</i> sequence data) | 9853                                 | 8 plastid genes                                                    | 9089                                                                                              |
| Time tree       | Not used in diversification analysis                                                                    | Not used in diversification analysis | Penalized Likelihood (Sanderson, 2004), calibrated with 39 fossils | Uncorrelated lognormal relaxed clock (Drummond <i>et al.</i> , 2006), calibrated with 136 fossils |
| Diversification | Node imbalance (Fusco & Cronk,                                                                          | SymmeTREE (Chan & Moore, 2002, 2005) | MEDUSA (Alfaro <i>et al.</i> , 2009)                               | BAMM (Rabosky, 2014)                                                                              |

|                                   |                                                                                                                                                                                                                                                            |                                       |                                                                                                                                                                                                                                                                                            |  |
|-----------------------------------|------------------------------------------------------------------------------------------------------------------------------------------------------------------------------------------------------------------------------------------------------------|---------------------------------------|--------------------------------------------------------------------------------------------------------------------------------------------------------------------------------------------------------------------------------------------------------------------------------------------|--|
|                                   | <p>1995; Purvis <i>et al.</i>, 2002)</p> <p>logN/t difference between nested and nesting clade</p> <p>Node imbalance (Slowinski &amp; Guyer, 1993; Sanderson &amp; Donoghue, 1994)</p>                                                                     |                                       |                                                                                                                                                                                                                                                                                            |  |
| Shifts equivalent with this study | <p>5:</p> <ul style="list-style-type: none"> <li>• Asparagales/Xeronemataceae</li> <li>• Cyperaceae/Juncaceae Thurniaceae</li> <li>• Poaceae/Ecdiocoleaceae</li> <li>• Lamiales Il<sup>1</sup>/Tetrachondraceae</li> <li>• Fabaceae/Surianaceae</li> </ul> | Between 16 and 2700 shifts; not named | <p>10:</p> <ul style="list-style-type: none"> <li>• Mesangiospermae</li> <li>• Piperaceae</li> <li>• Arecaceae, Commelinales, Zingiberales</li> <li>• Cactaceae</li> <li>• Gentianales, Solanales, Boraginaceae, Lamiales</li> <li>• Montiniaceae, Sphenocleaceae, Hydroleaceae</li> </ul> |  |

|  |  |  |                                                                                                                                                                                         |  |
|--|--|--|-----------------------------------------------------------------------------------------------------------------------------------------------------------------------------------------|--|
|  |  |  | <ul style="list-style-type: none"><li>• Asteraceae</li><li>• Vochysiaceae,<br/>Myrtaceae,<br/>Melastomata<br/>ceae</li><li>• Capparaceae,<br/>Brassicaceae</li><li>• Fabaceae</li></ul> |  |
|--|--|--|-----------------------------------------------------------------------------------------------------------------------------------------------------------------------------------------|--|

<sup>1</sup>Lamiales II corresponds roughly to Lamiidae in APG IV, 2016.

<sup>2</sup>Caryophyllales I corresponds approximately to core Caryophyllales in Stevens, 2013.

735 <sup>3</sup>Caryophyllales II as Caryophyllales I, excluding Achatocarpaceae.

<sup>4</sup>Dioscoreidae: a clade within monocots that includes from Disocoreales to Poales.

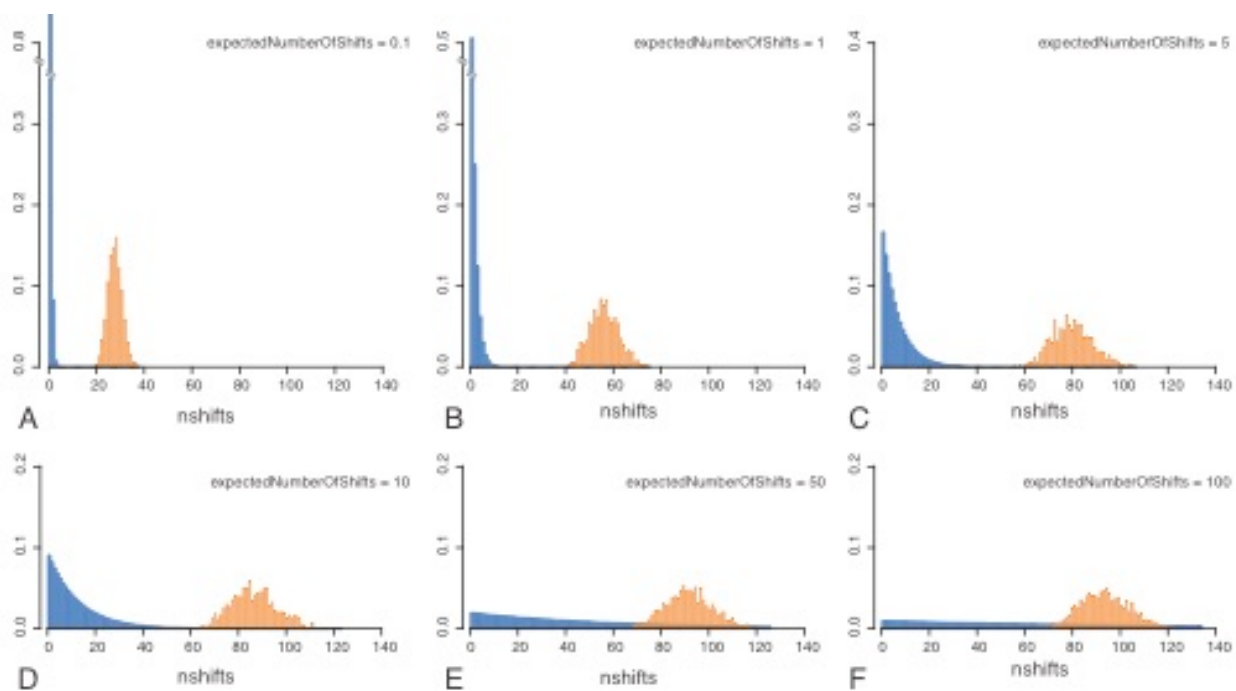

Figure 1



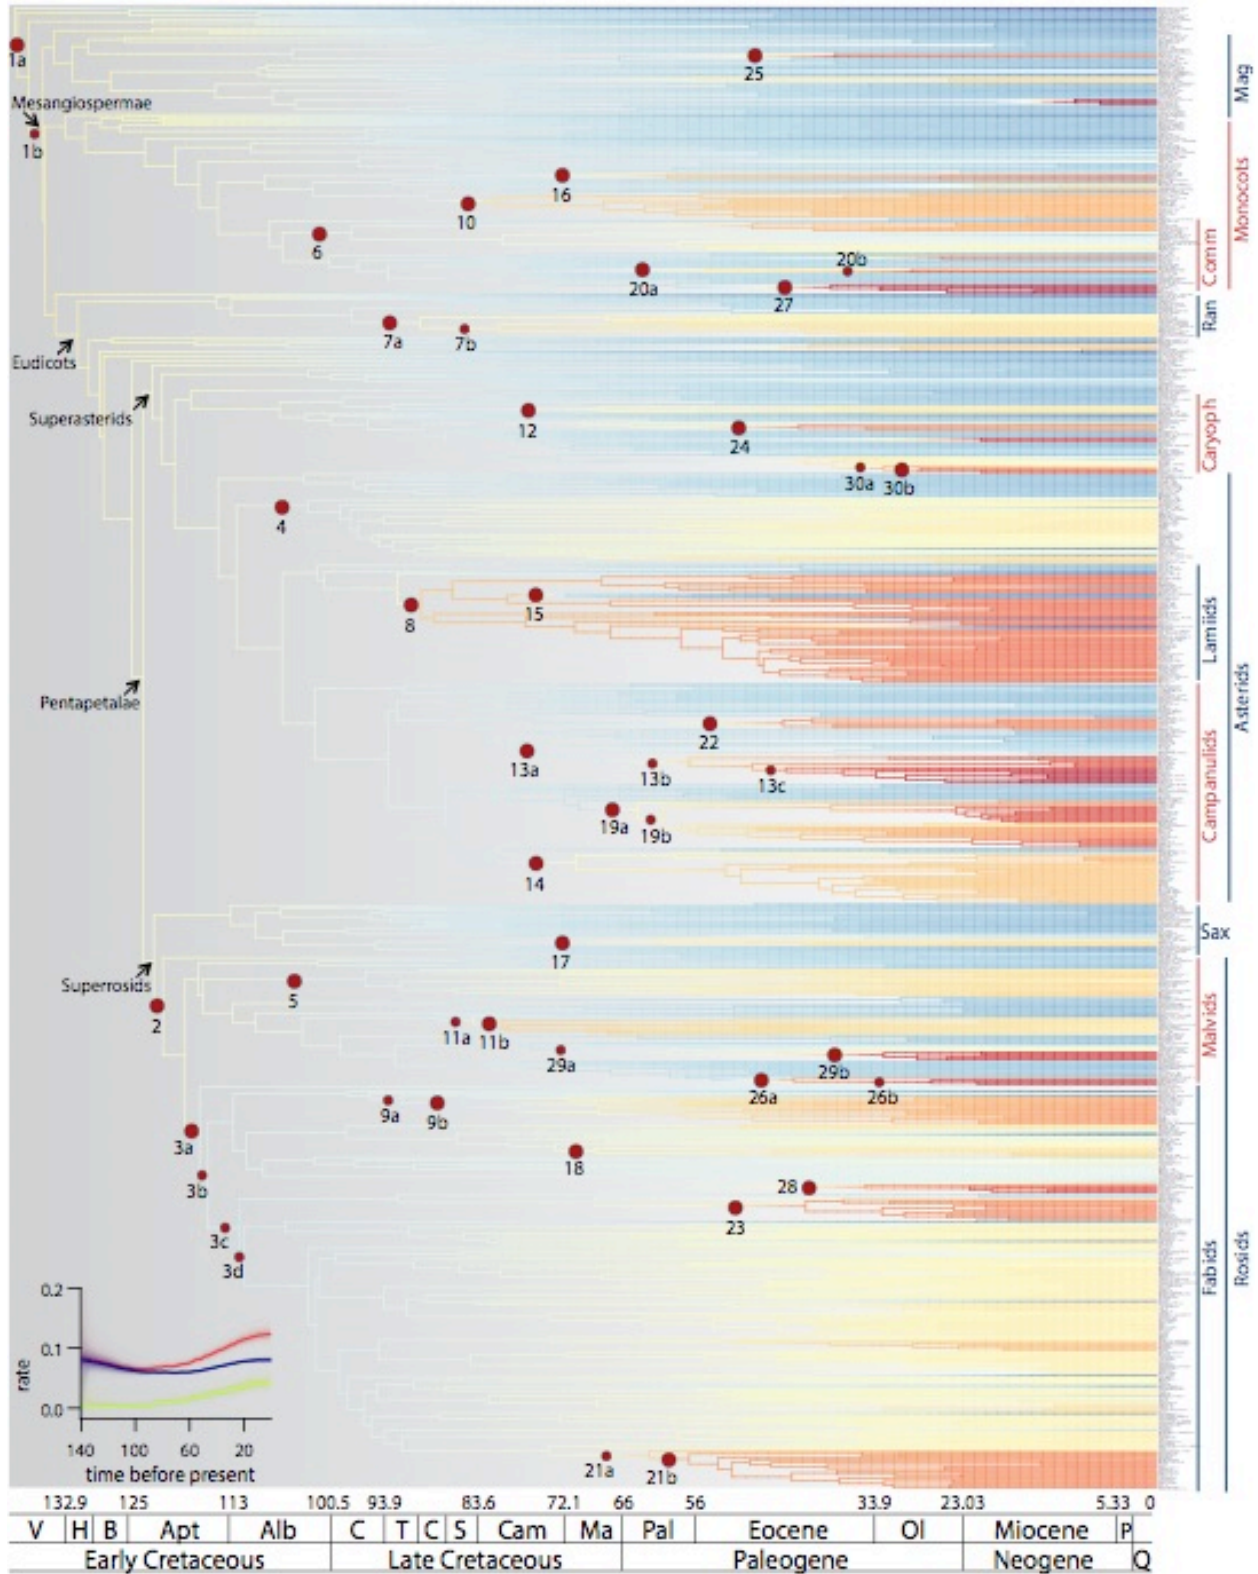

740

Figure 2

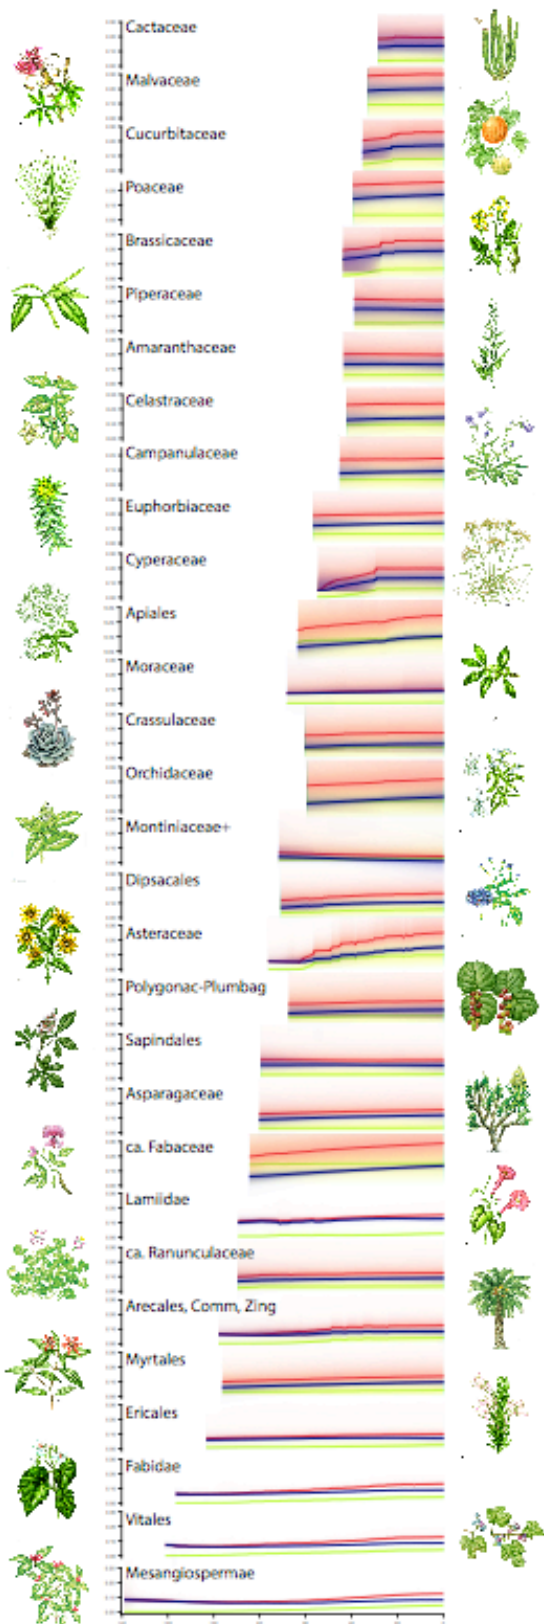

745 Figure 3

## Figure Legends

**Fig. 1.** Prior and posterior distributions of the number of rate shifts. Prior (blue) and posterior (orange) distributions of the number of shifts in six BAMM analyses conducted under different prior values for the expectedNumberOfShifts parameter: A. 0.1; B. 1; C. 5; D. 10; E. 50; F. 100. In all cases, the prior and posterior distributions are distinct and non-overlapping. As expected (Rabosky *et al.*, 2017), as the value on the prior on the expected number of shifts increases, the prior distribution becomes less informative, and the posterior distribution is wider, and centered around a higher value for the number of shifts. All plots are at the same scale, but the Y-axis in A and B was trimmed.

**Fig. 2.** Angiosperm diversification phylorate plot. Rate of diversification per time interval (3 Ma) averaged across all configurations within the 95% credible set obtained in the BAMM analysis with the prior for expected number of shifts = 100. Major angiosperm clades (APG IV, 2016) are indicated with arrows. In chronological order, core shifts correspond to: 1. ca.

Mesangiospermae; 2. Vitales + Rosids; 3. ca. Fabidae; 4. Ericales; 5. Myrtales; 6. Arecales + Commelinales + Zingiberales; 7. ca. Ranunculaceae; 8. Lamiidae; 9. ca. Fabaceae; 10. Asparagaceae + Amarillidaceae + Xanthorrhoeaceae + Asphodelaceae + Iridaceae + Tecophilaceae; 11. ca. Sapindales; 12. Polygonaceae + Plumbaginaceae; 13. ca. Asteraceae; 14. Dipsacales; 15. Montiniaceae + Hydroleaceae + Sphenocleaceae; 16. Orchidaceae; 17. Crassulaceae; 18. Moraceae + Urticaceae; 19. ca. Apiales; 20. ca. Cyperaceae; 21. ca. Euphorbiaceae; 22. Campanulaceae; 23. Celastraceae; 24. Amaranthaceae; 25. Piperaceae; 26. ca. Brassicaceae; 27. Poaceae; 28. Cucurbitaceae; 29. ca. Malvaceae; 30. ca. Cactaceae. See Table 1 and Supplementary Table 1 for description of the content of each clade. Some core shifts consist of moderately supported shifts on two or more adjacent branches, and are indicated with letters (e.g., 1a, 1b). The sub-shift indicated with a larger circle has the highest Marginal Odds Ratio (MOR). The inset shows the Diversification-Through-Time (DTT) plot for angiosperms as a whole, including graphs for diversification (blue), speciation (red) and extinction (green).

775 **Fig. 3.** Diversification Through Time plots for core shift clades. Diversification Through Time  
(DTT) plots for clades resulting from core diversification shift, sorted by onset time (Ma; from  
bottom to top), including graphs for diversification (blue), speciation (red) and extinction  
(green).

#### 780 **Supporting Information**

**Fig S1.** Phylorate plots of mean diversification rate. Phylorate plots showing the mean rate of  
diversification for each time interval (3 Ma) in each branch, averaged across the configurations  
in the posterior distribution resulting from diversification analyses conducted with a different  
magnitude for the prior of expected number of shifts: A = 0.1; B = 1; C = 5; D = 10; E = 50; F =  
785 100.

**Fig. S2.** Distribution of shift Marginal Odds Ratio (MOR). Distribution of MOR of shifts detected  
in diversification analyses conducted with different prior magnitudes for expected number of  
shifts: A = 0.1; B = 1; C = 5; D = 10; E = 50; F = 100. The magnitude of MORs varies among  
790 analyses, but in all cases, their distribution corresponds to a hollow curve in which few shifts  
have high MORs, and most have low MORs.

**Table S1.** Species list and GenBank accessions.

795 **Table S2.** Sampling fraction associated to each terminal.

**Table S3.** Thirty core angiosperm rate shifts, including shifts in adjacent branches in a distinct  
phylogenetic region.

800 **Table S4.** Thirty core angiosperm rate shifts, including shifts in adjacent branches in a distinct  
phylogenetic region.

**Table S5.** Values of Marginal Odds Ratio (MOR) and associated parameters.
