# Thirty clues to the exceptional diversification of flowering plants

Susana Magallón, Luna L. Sánchez-Reyes, Sandra L. Gómez-Acevedo

## **Supplementary Materials**

Figure S1: page 2

Figure S2: page 3

Table S1: page 4

Table S2: page 39

Table S3: separate file

Table S4: page 62

Table S5: page 67

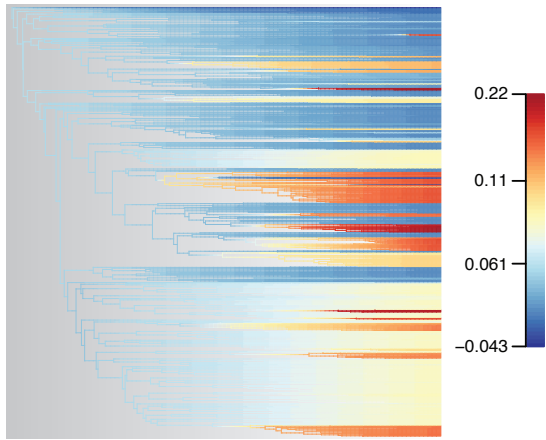

A expectedNumberOfShifts = 0.1

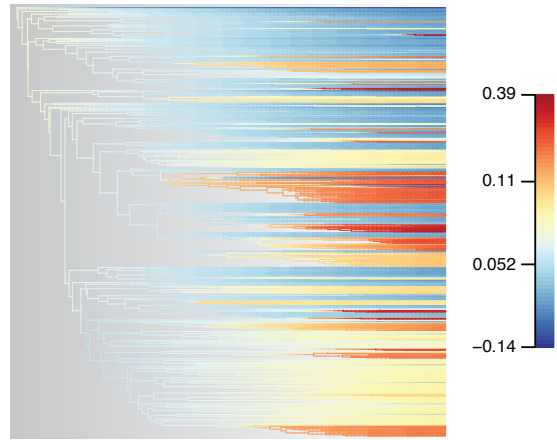

B expectedNumberOfShifts = 1

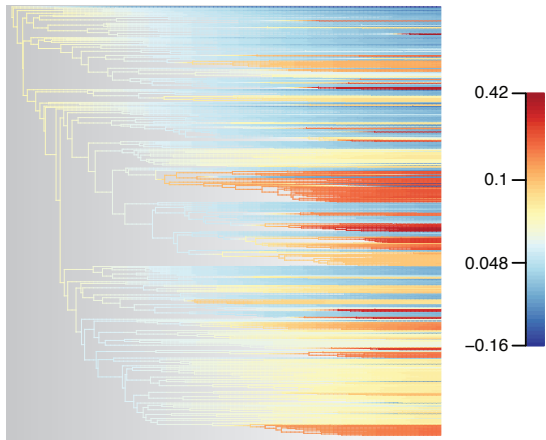

C expectedNumberOfShifts = 5

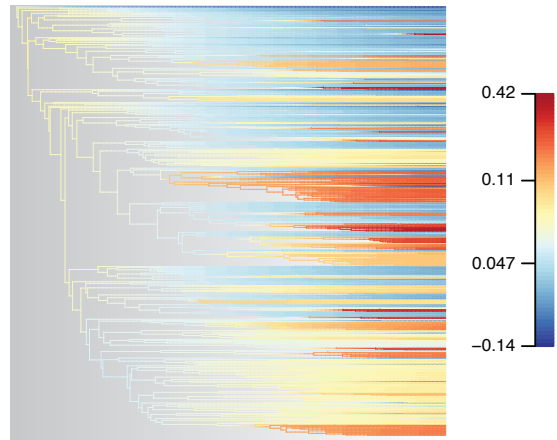

D expectedNumberOfShifts = 10

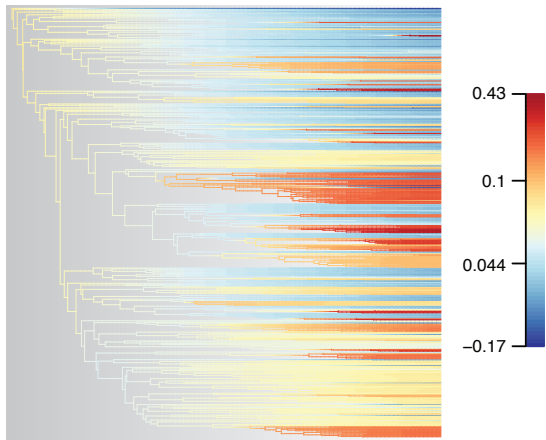

E expectedNumberOfShifts = 50

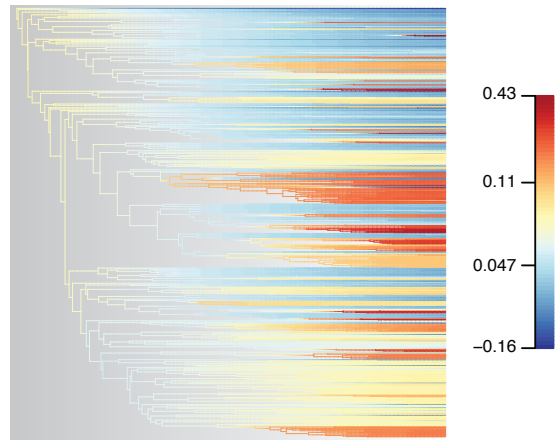

F expectedNumberOfShifts = 100

Figure S1

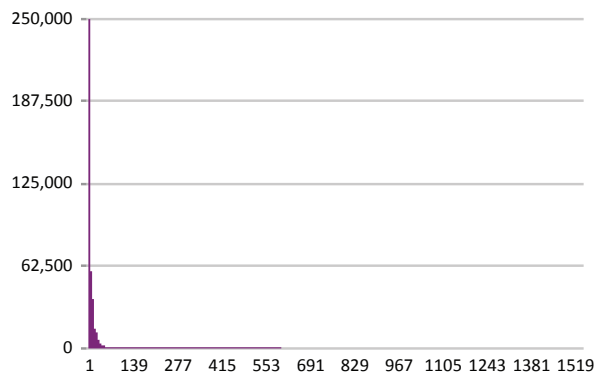

**A** expectedNumberOfShifts = 0.1

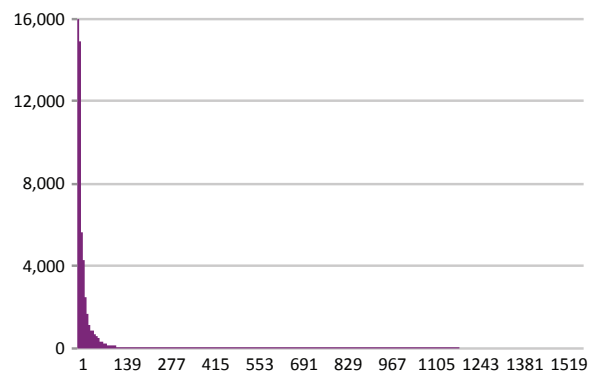

**B** expectedNumberOfShifts = 1

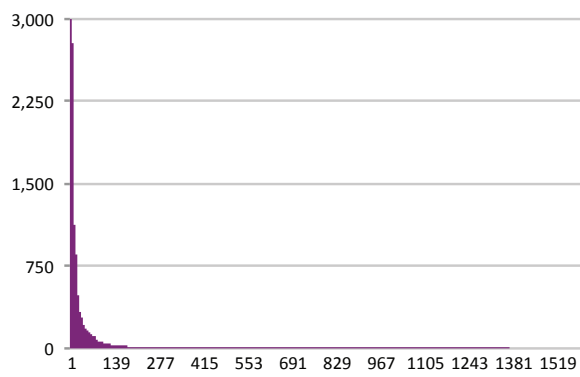

**C** expectedNumberOfShifts = 5

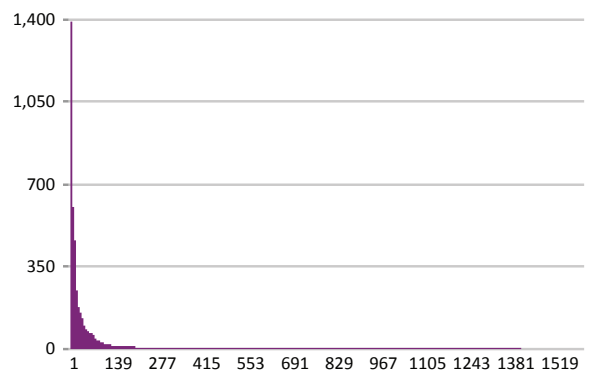

**D** expectedNumberOfShifts = 10

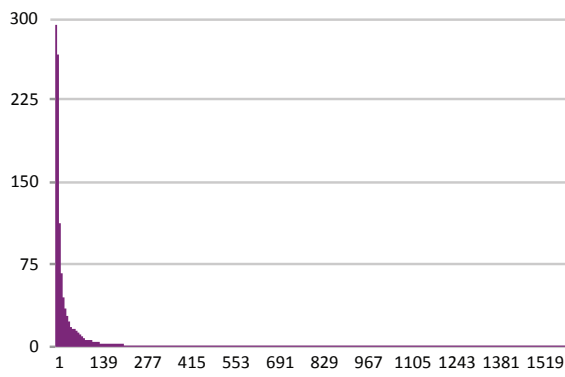

**E** expectedNumberOfShifts = 50

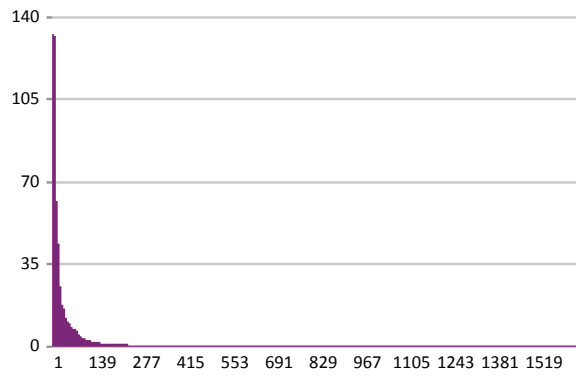

**F** expectedNumberOfShifts = 100

Figure S2

**Supplementary Table 1.** Species list and GenBank accessions. List of species included in diversification analyses, including the order and family to which they belong, and GenBank accession.

| Order            | Family            | Species                          | <i>rbcL</i> | <i>atpB</i> | <i>matK</i>          | 18S        | 26S        |
|------------------|-------------------|----------------------------------|-------------|-------------|----------------------|------------|------------|
| Amborellales     | Amborellaceae     | <i>Amborella trichopoda</i>      | L12628.2    | AJ235389.1  | AF543721.1           | U42497.1   | AF479238.1 |
| Nymphaeales      | Hydatellaceae     | <i>Trithuria submersa</i>        | DQ915188.1  | AJ419142.1  |                      |            |            |
| Nymphaeales      | Hydatellaceae     | <i>Trithuria austinensis</i>     |             |             | JQ284130.1           |            |            |
| Nymphaeales      | Nymphaeaceae      | <i>Nymphaea odorata</i>          | M77034.1    | AJ235544.1  | DQ185549.1           | AF206973.1 |            |
| Nymphaeales      | Nymphaeaceae      | <i>Nymphaea sp.</i>              |             |             |                      |            | AY095465.1 |
| Nymphaeales      | Nymphaeaceae      | <i>Nuphar advena</i>             | DQ354691.1  | DQ354691.1  |                      |            |            |
| Nymphaeales      | Nymphaeaceae      | <i>Nuphar lutea</i>              |             |             | AF117100.1           |            |            |
| Nymphaeales      | Nymphaeaceae      | <i>Nuphar japonica</i>           |             |             |                      | D85295.1   |            |
| Nymphaeales      | Nymphaeaceae      | <i>Nuphar sp.</i>                |             |             |                      |            | DQ008660.2 |
| Nymphaeales      | Nymphaeaceae      | <i>Cabomba caroliniana</i>       | M77027.1    | AF187058.1  | DQ185527.1           | AF096691.1 | AF479239.1 |
| Nymphaeales      | Nymphaeaceae      | <i>Brasenia schreberi</i>        | M77031.1    | AF209544.1  | DQ185529.1           | AF206874.1 | DQ008661.2 |
| Austrobaileyales | Austrobaileyaceae | <i>Austrobaileya scandens</i>    | L12632.2    | AJ235403.1  | DQ401347.1, 77743621 | AF206858.1 | AY095452.1 |
| Austrobaileyales | Trimeniaceae      | <i>Trimenia moorei</i>           | 7580491     | AY116653.1  | DQ401360.1           |            | AY095470.1 |
| Austrobaileyales | Schisandraceae    | <i>Illicium floridanum</i>       | DQ182334.1  |             | AF543738.1           |            |            |
| Austrobaileyales | Schisandraceae    | <i>Illicium parviflorum</i>      | 37194806    | U86385.2    |                      | L75832.1   |            |
| Austrobaileyales | Schisandraceae    | <i>Illicium verum</i>            |             |             |                      |            | EU161362.1 |
| Austrobaileyales | Schisandraceae    | <i>Schisandra chinensis</i>      | AF238061.1  | AF239790.1  |                      | AF094561.1 |            |
| Austrobaileyales | Schisandraceae    | <i>Schisandra rubriflora</i>     |             |             | AF543750.1           |            |            |
| Austrobaileyales | Schisandraceae    | <i>Schisandra sphenanthera</i>   |             |             |                      |            | DQ008658.1 |
| Austrobaileyales | Schisandraceae    | <i>Kadsura japonica</i>          | AF197595.1  | AF197607.1  | DQ185525.1, 77743625 | AF293763.1 | DQ008657.1 |
| Chloranthales    | Chloranthaceae    | <i>Hedyosmum arborescens</i>     | L12649.2    | AJ235491.1  | DQ401339.1           | AF206925.1 | AF479226.1 |
| Chloranthales    | Chloranthaceae    | <i>Ascarina lucida</i>           | 9623108     | AF239775    |                      |            |            |
| Chloranthales    | Chloranthaceae    | <i>Ascarina sp.</i>              |             |             | 89242557             |            | 66969244   |
| Chloranthales    | Chloranthaceae    | <i>Ascarina rubricaulis</i>      |             |             |                      |            |            |
| Chloranthales    | Chloranthaceae    | <i>Sarcandra chloranthoides</i>  | AY236833.1  |             | AJ966796.1           |            | DQ008655.1 |
| Chloranthales    | Chloranthaceae    | <i>Sarcandra grandiflora</i>     |             | AJ235593.1  |                      | 7595532    |            |
| Chloranthales    | Chloranthaceae    | <i>Sarcandra glabra</i>          |             |             |                      | AF094536.1 |            |
| Chloranthales    | Chloranthaceae    | <i>Chloranthus japonicus</i>     | L12640.2    | AJ235431.2  |                      |            | AF479245.1 |
| Chloranthales    | Chloranthaceae    | <i>Chloranthus brachystachys</i> |             |             | AF543733.1           |            |            |
| Chloranthales    | Chloranthaceae    | <i>Chloranthus spicatus</i>      |             |             |                      | D29787.1   |            |
| Canellales       | Canellaceae       | <i>Cinnamodendron ekmanii</i>    |             | AJ235435.1  | AF465290.1           | AF206887.1 |            |
| Canellales       | Canellaceae       | <i>Cinnamodendron sp.</i>        |             |             |                      |            | AY095458.1 |
| Canellales       | Canellaceae       | <i>Canella winterana</i>         | AY572265.1  | AF528847.1  | DQ882240.1           | AF206879.1 | AY095455.1 |

|             |                  |                                   |            |                    |            |            |            |
|-------------|------------------|-----------------------------------|------------|--------------------|------------|------------|------------|
| Canellales  | Winteraceae      | <i>Takhtajania perrieri</i>       | AF206824.1 | AY572287.1         | DQ401371.1 | AF207032.1 | DQ008645.1 |
| Canellales  | Winteraceae      | <i>Tasmannia insipida</i>         | L01957.2   | AF093424.1         |            | AF207035.1 | AY095469.1 |
| Canellales  | Winteraceae      | <i>Tasmannia lanceolata</i>       |            |                    | DQ882241.1 |            |            |
| Canellales  | Winteraceae      | <i>Drymis winteri</i>             | L01905.2   | AF093425.1         |            | U42823.1   | AF036491.1 |
| Canellales  | Winteraceae      | <i>Drymis granadensis</i>         |            |                    | DQ887676.1 |            |            |
| Piperales   | Aristolochiaceae | <i>Saruma henryi</i>              | 2924746    | 33327768           | 111154467  | 472412     | 66969232   |
| Piperales   | Aristolochiaceae | <i>Asarum canadense</i>           | L14290.1   | U86383.1           |            |            | DQ008643.1 |
| Piperales   | Aristolochiaceae | <i>Asarum yakusimense</i>         |            |                    | DQ882197.1 |            |            |
| Piperales   | Aristolochiaceae | <i>Asarum tamaensis</i>           |            |                    |            | DQ472350.1 |            |
| Piperales   | Aristolochiaceae | <i>Lactoris fernandeziana</i>     | L08763.1   | AJ235515.2         | DQ882195.1 | U42783.1   | AY095463.1 |
| Piperales   | Aristolochiaceae | <i>Thottea tomentosa</i>          | AF197598.1 | AF197609.1         | AB060738.1 | DQ007406.1 | DQ008642.1 |
| Piperales   | Aristolochiaceae | <i>Thottea corymbosa</i>          |            |                    | 111154473  |            |            |
| Piperales   | Aristolochiaceae | <i>Aristolochia macrophylla</i>   | L12630.2   | AF528845.1         | AB060742.1 | AF206855.1 | AY095450.1 |
| Piperales   | Aristolochiaceae | <i>Aristolochia manshuriensis</i> |            |                    | 111154481  |            |            |
| Piperales   | Piperaceae       | <i>Piper arborescens</i>          | AY572253.1 |                    |            |            |            |
| Piperales   | Piperaceae       | <i>Piper capense</i>              | 125991626  |                    |            |            |            |
| Piperales   | Piperaceae       | <i>Piper betle</i>                |            | AF528856.1         |            | AF206992.1 | AY095467.1 |
| Piperales   | Piperaceae       | <i>Piper nigrum</i>               |            |                    | AB040153.2 |            |            |
| Piperales   | Piperaceae       | <i>Peperomia caliginigaudes</i>   | AY572269.1 | AY572291.1         |            | AY572313.1 |            |
| Piperales   | Piperaceae       | <i>Peperomia sp.</i>              | 7105714    |                    |            |            |            |
| Piperales   | Piperaceae       | <i>Peperomia graveolens</i>       |            |                    | DQ212722.1 |            |            |
| Piperales   | Piperaceae       | <i>Peperomia incana</i>           |            |                    | 78155761   |            |            |
| Piperales   | Piperaceae       | <i>Peperomia obtusifolia</i>      |            |                    |            |            | DQ008641.2 |
| Piperales   | Saururaceae      | <i>Houttuynia cordata</i>         | AB205610.1 | AY572283.1, D89555 | AF543737.1 | AF206929.1 | DQ008640.1 |
| Piperales   | Saururaceae      | <i>Saururus cernuus</i>           | L14294.1   | AF187061.1         | AF543749.1 |            | AY095468.1 |
| Piperales   | Saururaceae      | <i>Saururus chinensis</i>         |            |                    |            | AY572303.1 |            |
| Piperales   | Saururaceae      | <i>Anemopsis californica</i>      | AF197597   | AF197608.1         | DQ882198.1 | AF197576.1 | DQ008639.1 |
| Magnoliales | Magnoliaceae     | <i>Magnolia tripetala</i>         | AF206791.1 | AJ235526.1         |            | AF206956.1 |            |
| Magnoliales | Magnoliaceae     | <i>Magnolia denudata</i>          |            |                    | AF123465.1 |            | AF479244.1 |
| Magnoliales | Magnoliaceae     | <i>Liriodendron chinense</i>      | L12654.1   |                    | AF123481.1 | AJ235981.1 | AY095464.1 |
| Magnoliales | Magnoliaceae     | <i>Liriodendron tulipifera</i>    |            | AJ235522.1         |            |            |            |
| Magnoliales | Degeneriaceae    | <i>Degeneria vitensis</i>         | L12643.1   | AJ235451.1         | AB055549.1 | AF206898.1 | DQ008637.1 |
| Magnoliales | Myristicaceae    | <i>Myristica fragrans</i>         | AF206798   | AJ235539           | AJ966803   | AF206968   |            |
| Magnoliales | Myristicaceae    | <i>Myristica maingayi</i>         |            |                    | 32483787   |            |            |
| Magnoliales | Myristicaceae    | <i>Mauloutchia chapelieri</i>     | AF197594   | AF197606           | AY220451   | DQ007409   | DQ008638   |
| Magnoliales | Himantandraceae  | <i>Galbulimima belgraveana</i>    | L12646.2   | AJ235478.1         | AY220441.1 | AF206916.1 | AY095459.1 |
| Magnoliales | Eupomatiaceae    | <i>Eupomatia bennettii</i>        | L12644.2   | AJ235473.1         | DQ401341.1 | AF469771.1 | DQ008636.1 |
| Magnoliales | Annonaceae       | <i>Cananga odorata</i>            | AY841602.1 | DQ007418.1         | AY220438.1 | AF469770.1 | DQ008635.2 |
| Magnoliales | Annonaceae       | <i>Asimina triloba</i>            | AY743441   | AF209532.1         | AF543725.1 | AF206850.1 | AY095451.1 |
| Magnoliales | Annonaceae       | <i>Annona muricata</i>            | AY743440.1 | AJ235393.2         | AF543722.1 | AF206850.1 | DQ008634.2 |

|             |                    |                                     |            |            |            |            |            |
|-------------|--------------------|-------------------------------------|------------|------------|------------|------------|------------|
| Lurales     | Calycanthaceae     | <i>Idiospermum australiense</i>     | L12651.2   | AJ235500.1 | AY525342.1 | AF206937.1 | DQ008633.1 |
| Lurales     | Calycanthaceae     | <i>Chimonanthus praecox</i>         | L12639.2   | D89558.1   | AY525340.1 | AF503352.1 | DQ008632.1 |
| Lurales     | Calycanthaceae     | <i>Calycanthus floridus</i>         | L14291.1   | AJ235422.1 | AF543730.1 | U38318.1   |            |
| Lurales     | Calycanthaceae     | <i>Calycanthus occidentalis</i>     |            |            |            |            | AY095454.1 |
| Lurales     | Siparunaceae       | <i>Siparuna glycyarpa</i>           | AF129016.1 |            |            |            |            |
| Lurales     | Siparunaceae       | <i>Siparuna brasiliensis</i>        |            | DQ007421.1 | DQ401375.1 |            |            |
| Lurales     | Siparunaceae       | <i>Siparuna dicipiens</i>           |            |            |            | DQ007411.1 |            |
| Lurales     | Siparunaceae       | <i>Siparuna decipines</i>           |            |            |            |            | DQ008631.1 |
| Lurales     | Gomortegaceae      | <i>Gomortega keule</i>              | AF206773.1 | D89560.1   |            | AF206918.1 | AY095460.1 |
| Lurales     | Atherospermataceae | <i>Doryphora aromatica</i>          | L77211.2   |            |            |            |            |
| Lurales     | Atherospermataceae | <i>Doryphora sassafras</i>          |            | AF293858.1 | AF542568.1 | AF293754.1 | DQ008630.1 |
| Lurales     | Atherospermataceae | <i>Atherosperma moschatum</i>       | 4416440    | 6467921    | 89242567   | 6467908    | 66969216   |
| Lurales     | Atherospermataceae | <i>Daphnandra repandula</i>         | 4176744    |            |            |            |            |
| Lurales     | Atherospermataceae | <i>Daphnandra micrantha</i>         |            | 15705375   | 89242569   | 6467909    | 66969217   |
| Lurales     | Lauraceae          | <i>Cryptocarya obovata</i>          | L28950.1   |            |            |            |            |
| Lurales     | Lauraceae          | <i>Cryptocarya meissneriana</i>     |            | AF197602.1 |            | AF293757.1 | DQ008627.1 |
| Lurales     | Lauraceae          | <i>Cryptocarya alba</i>             |            |            | AJ247158.1 |            |            |
| Lurales     | Lauraceae          | <i>Cryptocarya subtripplinervia</i> |            |            | 59932887   |            |            |
| Lurales     | Lauraceae          | <i>Cinnamomum camphora</i>          | L12641.2   | AJ235436.1 | AJ247154.1 | AF206888.1 | DQ008625.1 |
| Lurales     | Lauraceae          | <i>Sassafras albidum</i>            | AF206819.1 | AF209668.1 |            | U52031.1   | AF264140.1 |
| Lurales     | Lauraceae          | <i>Sassafras tzumu</i>              |            |            | AF244391.1 |            |            |
| Lurales     | Lauraceae          | <i>Laurus nobilis</i>               | AY337731.1 | AJ235518.1 | AF244407.1 | AF197580.1 | DQ008626.1 |
| Lurales     | Lauraceae          | <i>Laurus azorica</i>               |            |            | 60495411   |            |            |
| Lurales     | Hernandiaceae      | <i>Hernandia ovigera</i>            | L12650.2   | DQ007419.1 |            | DQ007407.1 |            |
| Lurales     | Hernandiaceae      | <i>Hernandia nymphaeifolia</i>      |            |            | AJ247165.2 |            | AY095462.1 |
| Lurales     | Hernandiaceae      | <i>Gyrocarpus sp.</i>               | L12647.2   |            |            |            |            |
| Lurales     | Hernandiaceae      | <i>Gyrocarpus americanus</i>        |            | AJ235487.1 | DQ401370.1 | AF206923.1 | DQ008624.1 |
| Lurales     | Monimiaceae        | <i>Peumus boldus</i>                | AF206807.1 | AF209650.1 | AJ247183.2 | AF206988.1 | AY095466.1 |
| Lurales     | Monimiaceae        | <i>Hortonia floribunda</i>          | AF040663.1 | DQ007420.1 | AY437811.1 | DQ007408.1 | AF264143.1 |
| Lurales     | Monimiaceae        | <i>Hedycarya arborea</i>            | L12648.2   | AJ235490.1 | AM396509.1 | AF206924.1 | DQ008623.2 |
| Acorales    | Acoraceae          | <i>Acorus gramineus</i>             | D28866.1   | AF197616.1 | DQ182341.1 | AF197584.1 | AF036490.1 |
| Alismatales | Araceae            | <i>Orontium aquaticum</i>           | AJ005632.1 | AF197610.1 | AF543744.1 | AF293753.1 | DQ008652.2 |
| Alismatales | Araceae            | <i>Lemna minor</i>                  | 209417450  | NC_10109.1 |            |            |            |
| Alismatales | Araceae            | <i>Lemna aequinoctialis</i>         |            |            | 17220918   |            |            |
| Alismatales | Araceae            | <i>Xanthosoma sagittifolium</i>     | 7240497    |            |            |            |            |
| Alismatales | Araceae            | <i>Xanthosoma maffa</i>             |            | 89242541   |            |            |            |
| Alismatales | Araceae            | <i>Xanthosoma helleborifolium</i>   |            |            | 209417770  |            |            |

|               |                  |                                   |            |            |                      |            |            |
|---------------|------------------|-----------------------------------|------------|------------|----------------------|------------|------------|
| Alismatales   | Araceae          | <i>Spathiphyllum wallisii</i>     | AJ235807.1 | AJ235606.2 | 209417664            | AF207023.1 | AY095473.1 |
| Alismatales   | Araceae          | <i>Spathiphyllum floribundum</i>  |            |            |                      | AF542575.1 |            |
| Alismatales   | Tofieldiaceae    | <i>Tofieldia calyculata</i>       | AB183410.1 | AJ235627.2 | AB183403.1           | AF207043.1 | DQ008653.1 |
| Alismatales   | Tofieldiaceae    | <i>Pilea tenuifolia</i>           | AJ131774.1 | AJ235564.2 | AB183407.1           | AF206995.1 | AY095472.1 |
| Alismatales   | Juncaginaceae    | <i>Triglochin maritima</i>        | AB088811.1 | AF197601.1 | AF542566.1, 47604605 | AF197586.1 | DQ008650.2 |
| Alismatales   | Potamogetonaceae | <i>Potamogeton distinctus</i>     | AB088809.1 |            | AB002581.1           |            |            |
| Alismatales   | Potamogetonaceae | <i>Potamogeton berchtoldii</i>    |            | AF197600.1 |                      | DQ007410.1 | DQ008649.1 |
| Alismatales   | Alismataceae     | <i>Alisma plantago-aquatica</i>   | 166423     | DQ007417   |                      | 6467915    | 66969239   |
| Alismatales   | Alismataceae     | <i>Alisma canaliculatum</i>       |            |            | 10862963             |            |            |
| Alismatales   | Hydrocharitaceae | <i>Najas guadalupensis</i>        | DQ859169.1 |            |                      |            |            |
| Alismatales   | Hydrocharitaceae | <i>Najas gracilima</i>            |            | DQ401333.1 |                      |            |            |
| Alismatales   | Hydrocharitaceae | <i>Najas minor</i>                |            |            | HM240480.1           | EF526347.1 | EF526396.1 |
| Alismatales   | Hydrocharitaceae | <i>Hydrocharis dubia</i>          | AB004892.1 |            | AB002572.1           | AY952398.1 |            |
| Alismatales   | Hydrocharitaceae | <i>Hydrocharis morsus-ranae</i>   |            | DQ401334.1 |                      |            |            |
| Petrosaviales | Petrosaviaceae   | <i>Japonalirion osense</i>        | AB088835   | AY147598   | AB040161             | AF206942   |            |
| Petrosaviales | Petrosaviaceae   | <i>Petrosavia sakuraii</i>        | AB088839   |            | AB040156             |            |            |
| Petrosaviales | Petrosaviaceae   | <i>Petrosavia stellaris</i>       |            | AF209649   |                      | AF206987   |            |
| Dioscoreales  | Nartheciaceae    | <i>Metanarthecium luteoviride</i> | AB088837.1 | AF308041.1 | AB040163.1           | AF309410.1 |            |
| Dioscoreales  | Taccaceae        | <i>Tacca chantieri</i>            | AJ235810.1 | AF308025.1 |                      |            | AY095474.1 |
| Dioscoreales  | Taccaceae        | <i>Tacca sp.</i>                  |            |            | AB088792.1           |            |            |
| Dioscoreales  | Taccaceae        | <i>Tacca leontopetaloides</i>     |            |            |                      | EU420999.1 |            |
| Dioscoreales  | Dioscoreaceae    | <i>Dioscorea maciba</i>           | AY904800.1 |            |                      |            |            |
| Dioscoreales  | Dioscoreaceae    | <i>Dioscorea mcvaughii</i>        |            | AF308004.1 |                      |            |            |
| Dioscoreales  | Dioscoreaceae    | <i>Dioscorea alata</i>            |            |            | AB040208.1           |            |            |
| Dioscoreales  | Dioscoreaceae    | <i>Dioscorea schimperiana</i>     |            |            |                      | AF309393.1 |            |
| Dioscoreales  | Dioscoreaceae    | <i>Dioscorea macrostachya</i>     |            |            |                      |            | AF205123.1 |
| Dioscoreales  | Burmanniaceae    | <i>Burmannia biflora</i>          | AF206742.1 | AF209548.1 |                      | AF168827.1 |            |
| Dioscoreales  | Burmanniaceae    | <i>Burmannia madagascariensis</i> |            |            | AY956485.1           |            | AF290589.1 |
| Pandanales    | Stemonaceae      | <i>Croomia pauciflora</i>         | AY298827.1 |            | AY437815.1           | AF168835.1 | DQ008647.1 |
| Pandanales    | Stemonaceae      | <i>Croomia japonica</i>           | 17224679   | AF308039.1 |                      |            |            |
| Pandanales    | Cyclanthaceae    | <i>Carludovica palmata</i>        | AF197596.1 | AY465545.1 | AB088793.1           | AF293756.1 | DQ008648.1 |
| Pandanales    | Velloziaceae     | <i>Acanthochlamys bracteata</i>   | HQ845619.1 |            | AY952413.1           | AY952411.1 |            |
| Pandanales    | Velloziaceae     | <i>Xerophyta retinervis</i>       | EU213532.1 | JN017040.1 | EU214302.1           |            | AF205878.1 |
| Pandanales    | Velloziaceae     | <i>Xerophyta humilis</i>          |            |            |                      | EF418586.1 |            |
| Pandanales    | Velloziaceae     | <i>Barbacenia elegans</i>         | AJ131946.1 | AJ235406.2 |                      | AF206861.1 |            |
| Liliales      | Campynemataceae  | <i>Campynema linearis</i>         | Z77264     | AJ417573   | JN417414.1           | GQ497570.1 | AF364029   |
| Liliales      | Smilacaceae      | <i>Smilax glauca</i>              | AF206822.1 | AF209677.1 |                      | 1280407    |            |
| Liliales      | Smilacaceae      | <i>Smilax china</i>               |            |            | AB040204.1           |            |            |
| Liliales      | Smilacaceae      | <i>Smilax bonanox</i>             |            |            |                      |            | AF293852.1 |
| Liliales      | Liliaceae        | <i>Lilium superbum</i>            | L12682.2   | AF209618.1 |                      | AF206952.1 |            |
| Liliales      | Liliaceae        | <i>Lilium alexandrae</i>          |            |            | AB030849.1           |            |            |
| Liliales      | Liliaceae        | <i>Lilium michauxii</i>           |            |            |                      |            | AF205126.1 |

|             |                  |                                 |            |             |            |                       |
|-------------|------------------|---------------------------------|------------|-------------|------------|-----------------------|
| Liliales    | Philesiaceae     | <i>Philesia buxifolia</i>       | Z77302.1   |             | AY624479.1 |                       |
| Liliales    | Philesiaceae     | <i>Philesia magellanica</i>     |            | AY465551.1  |            |                       |
| Liliales    | Philesiaceae     | <i>Lapageria rosea</i>          | Z77301     | AJ235517    | AY624480   | X63304                |
| Liliales    | Melanthiaceae    | <i>Trillium grandiflorum</i>    | D28164.1   |             |            |                       |
| Liliales    | Melanthiaceae    | <i>Trillium erectum</i>         |            | AJ417585.1  |            | AF207048.1            |
| Liliales    | Melanthiaceae    | <i>Trillium viridescens</i>     |            |             | AB017416.1 |                       |
| Liliales    | Melanthiaceae    | <i>Trillium gracile</i>         |            |             |            | AF205128.1            |
| Liliales    | Colchicaceae     | <i>Colchicum speciosum</i>      | L12673.2   | AF209569.1  | AB040181.2 |                       |
| Liliales    | Colchicaceae     | <i>Colchicum autumnale</i>      |            |             |            | U42072.1 AF331971.1   |
| Liliales    | Alstroemeriaceae | <i>Bomarea hirtella</i>         | Z77255     | AJ235413    |            | AF206871              |
| Liliales    | Alstroemeriaceae | <i>Bomarea pauciflora</i>       |            |             | EU159966.1 |                       |
| Liliales    | Alstroemeriaceae | <i>Alstroemeria aurea</i>       | AY120359   | AY465546    |            |                       |
| Liliales    | Alstroemeriaceae | <i>Alstroemeria sp.</i>         |            |             | AY624481   |                       |
| Liliales    | Alstroemeriaceae | <i>Alstroemeria pulchra</i>     |            |             |            | AF290586              |
| Asparagales | Asparagales      | <i>Cypripedium calceolus</i>    | AB176549.1 | AJ235448.2  | AY557208.1 | AF069208.1            |
| Asparagales | Asparagales      | <i>Cypripedium kentuckiense</i> |            |             |            | AF205119.1            |
| Asparagales | Asparagales      | <i>Phalaenopsis equestris</i>   | 3560803    |             |            |                       |
| Asparagales | Asparagales      | <i>Phalaenopsis aphrodite</i>   |            | NC_007499.1 |            |                       |
| Asparagales | Asparagales      | <i>Phalaenopsis chibae</i>      |            |             | 76667833   |                       |
| Asparagales | Asparagales      | <i>Oncidium excavatum</i>       | 3560783    | 8452707     |            |                       |
| Asparagales | Asparagales      | <i>Oncidium durangense</i>      |            |             | 223370962  |                       |
| Asparagales | Asparagales      | <i>Oncidium ornithoglossum</i>  |            |             |            | 6273824               |
| Asparagales | Boryaceae        | <i>Borya septentrionalis</i>    | AF206741   | AF209543    | HM640651   | AF206872              |
| Asparagales | Blandfordiaceae  | <i>Blandfordia punicea</i>      | 1497826    | 8439256     | 71167184   | 7595389               |
| Asparagales | Hypoxidaceae     | <i>Malinaria capitulata</i>     | HM640538.1 | AF168901.1  | AB088783.1 | HM640770.1            |
| Asparagales | Hypoxidaceae     | <i>Rhodohypoxis millioides</i>  | Z77280.1   | AJ235582.2  | AY368377.1 | AF207008.1            |
| Asparagales | Hypoxidaceae     | <i>Hypoxis hemerocallidea</i>   | HM640539.1 |             | HM640657.1 | HM640771.1            |
| Asparagales | Hypoxidaceae     | <i>Hypoxis hirsuta</i>          |            |             | 1          | 1                     |
| Asparagales | Tecophilaeaceae  | <i>Tecophilaea cyanocrocus</i>  | HM640544.1 | AJ235620.2  | HM640661.1 | AF207036.1            |
| Asparagales | Ixioliriaceae    | <i>Ixiolirion tataricum</i>     | HM640543.1 | AY147621.1  | AJ579965.1 | HM640775.1            |
| Asparagales | Iridaceae        | <i>Alophia silvestris</i>       | JQ670512.1 |             |            |                       |
| Asparagales | Iridaceae        | <i>Alophia veracruzana</i>      |            |             | AJ579931.1 |                       |
| Asparagales | Iridaceae        | <i>Alophia drummondii</i>       |            |             |            | AF203685.1            |
| Asparagales | Iridaceae        | <i>Iris missouriensis</i>       | 37722359   | 37720992    |            |                       |
| Asparagales | Iridaceae        | <i>Iris colchica</i>            |            |             | 58219817   |                       |
| Asparagales | Iridaceae        | <i>Iris tenax</i>               |            |             |            | JQ283937.1 JQ283879.1 |
| Asparagales | Iridaceae        | <i>Aristea glauca</i>           | Z77282.1   | AF209531.1  | AJ579933.1 | AF206854.1            |
| Asparagales | Iridaceae        | <i>Gladiolus buckerveldii</i>   | AF206772.1 | AF209592.1  | HQ394274.1 | L54062.1              |
| Asparagales | Xanthorrhoeaceae | <i>Xanthorrhoea resinosa</i>    | 37722369   | 37721004    |            |                       |



|                         |                  |                                   |            |            |            |            |            |
|-------------------------|------------------|-----------------------------------|------------|------------|------------|------------|------------|
| Asparagales             | Xanthorrhoeaceae | <i>Xanthorrhoea quadrangulata</i> |            |            | 89242571   | 2795854    |            |
| Asparagales             | Asphodelaceae    | <i>Bulbine succulenta</i>         | Z73684.1   | AJ235421.1 |            | AF206876.1 | AY095471.1 |
| Asparagales             | Asphodelaceae    | <i>Bulbine frutescens</i>         |            |            | AJ511414.1 |            |            |
| Asparagales             | Amaryllidaceae   | <i>Crinum asiaticum</i>           | HM640488.1 | JQ273605.1 |            | HM640718.1 |            |
| Asparagales             | Amaryllidaceae   | <i>Crinum moorei</i>              |            |            | AB017279.1 |            |            |
| Asparagales             | Amaryllidaceae   | <i>Crinum americanum</i>          |            |            |            |            | AF293854.1 |
| Asparagales             | Amaryllidaceae   | <i>Nothoscordum bivalve</i>       | Z69202.1   |            |            |            | AF293853.1 |
| Asparagales             | Amaryllidaceae   | <i>Nothoscordum dialyctemon</i>   |            | AJ235504.2 | JQ435522.1 |            |            |
| Asparagales             | Amaryllidaceae   | <i>Allium fistulosum</i>          | 124484484  |            |            |            |            |
| Asparagales             | Amaryllidaceae   | <i>Allium textile</i>             |            | 37721008   |            |            |            |
| Asparagales             | Amaryllidaceae   | <i>Allium grayi</i>               |            |            | 5832656    |            |            |
| Asparagales             | Amaryllidaceae   | <i>Allium thunbergii</i>          |            |            |            | AF168825   |            |
| Asparagales             | Asparagaceae     | <i>Asparagus officinalis</i>      | L05028.2   | AJ235400.2 |            |            | DQ008646.1 |
| Asparagales             | Asparagaceae     | <i>Asparagus cochinchinensis</i>  |            |            | AB029804.1 |            |            |
| Asparagales             | Asparagaceae     | <i>Asparagus falcatus</i>         |            |            |            | AF069205.1 |            |
| Asparagales             | Asparagaceae     | <i>Agave ghiesbreghtii</i>        | 17135864   | 14717923   |            | 7595361    |            |
| Asparagales             | Asparagaceae     | <i>Agave attenuata</i>            |            |            | 89242609   |            |            |
| Asparagales             | Asparagaceae     | <i>Yucca glauca</i>               | 37722389   |            |            |            |            |
| Asparagales             | Asparagaceae     | <i>Yucca schidigera</i>           |            | 69214423   |            |            |            |
| Asparagales             | Asparagaceae     | <i>Yucca filamentosa</i>          |            |            | 62511859   | 61741965   |            |
| Asparagales             | Asparagaceae     | <i>Lomandra longifolia</i>        | 7240316    |            |            |            |            |
| Asparagales             | Asparagaceae     | <i>Lomandra ordii</i>             |            | 16943762   |            |            |            |
| Asparagales             | Asparagaceae     | <i>Lomandra obliqua</i>           |            |            | 89242593   |            |            |
| Asparagales             | Asparagaceae     | <i>Lomandra hastilis</i>          |            |            |            | HM640750.1 |            |
| Asparagales             | Asparagaceae     | <i>Nolina recurvata</i>           | 7240393    | 14718150   | 5731683    | HM640703.1 |            |
| unplaced Dasygogonaceae | Dasygogonaceae   | <i>Dasygogon bromeliifolius</i>   | AF206758.1 | AF168907.1 | AM114719.1 | AJ417898.1 | AF466384.1 |
| unplaced Dasygogonaceae | Dasygogonaceae   | <i>Calectasia cyanea</i>          | AJ286557.1 |            | DQ888765.1 |            | AY079521.1 |
| unplaced Dasygogonaceae | Dasygogonaceae   | <i>Calectasia intermedia</i>      |            | AF168891.1 |            | AF069209.1 |            |
| Arecales                | Arecaceae        | <i>Chamaedorea seifrizii</i>      | 17135901   | 7582347    |            | 3342023    |            |
| Arecales                | Arecaceae        | <i>Chamaedorea oblongata</i>      |            |            | 77819970   |            |            |
| Arecales                | Arecaceae        | <i>Elaeis guineensis</i>          |            | 192910867  | 90967848   |            |            |
| Arecales                | Arecaceae        | <i>Elaeis oleifera</i>            |            |            |            | 12584295   |            |
| Arecales                | Arecaceae        | <i>Caryota mitis</i>              | M81811     | AF233082   | AY952414   | AF168831   |            |
| Arecales                | Arecaceae        | <i>Trachycarpus fortunei</i>      | AJ404752   | AY012403   | HQ619794   | AY012346   | AF290588   |
| Arecales                | Arecaceae        | <i>Phoenix dactylifera</i>        | AM110195   | AY012411   | AB040211.1 | AY012354   |            |
| Commelinales            | Commelinaceae    | <i>Tradescantia spathacea</i>     | 90968377   |            | 90967931   |            |            |
| Commelinales            | Commelinaceae    | <i>Tradescantia ohimensis</i>     |            | AF168950.1 |            | AF069213.1 |            |
| Commelinales            | Philydraceae     | <i>Philydrum lanuginosum</i>      | U41596.2   | AY147607.1 | AY952429.1 | AY952390.1 | AF205519.1 |
| Commelinales            | Pontederiaceae   | <i>Pontederia cordata</i>         | U41593.1   | AF209657.1 | AF434872.1 | AF206998.1 | AF205517.1 |
| Commelinales            | Haemodoraceae    | <i>Anigozanthos flavidus</i>      | AJ404843.1 | AF387600.1 | AB088796.1 | AF069214.1 | AF290587.1 |
| Zingiberales            | Strelitziaceae   | <i>Strelitzia nicolai</i>         | 18026911   |            |            | 3342042    |            |

|              |                  |                                  |            |                        |            |            |            |            |
|--------------|------------------|----------------------------------|------------|------------------------|------------|------------|------------|------------|
| Zingiberales | Strelitziaceae   | <i>Strelitzia reginae</i>        |            | 42559029               |            |            |            |            |
| Zingiberales | Strelitziaceae   | <i>Strelitzia alba</i>           |            |                        |            | 33314647   |            |            |
| Zingiberales | Strelitziaceae   | <i>Ravenala madagascariensis</i> | L05459     | AF168939               | AF434873   |            | AF069228   |            |
| Zingiberales | Strelitziaceae   | <i>Phenakospermum guyannense</i> | AF243845   | AF168938               | AF478911   |            | AF069227   |            |
| Zingiberales | Musaceae         | <i>Musa acuminata</i>            | L05455.1   | AF168931.1             |            |            | AF069226.1 | EU418632.1 |
| Zingiberales | Musaceae         | <i>Musa beccarii</i>             |            |                        |            | AF434869.1 |            |            |
| Zingiberales | Musaceae         | <i>Musa rosea</i>                |            |                        |            | 90967929   |            |            |
| Zingiberales | Zingiberaceae    | <i>Zingiber gramineum</i>        | L05465.1   | AF168953.1             | AB088799.1 |            | U42081.1   |            |
| Zingiberales | Zingiberaceae    | <i>Zingiber officinale</i>       |            |                        |            |            |            | AF205522.1 |
| Zingiberales | Marantaceae      | <i>Maranta bicolor</i>           | AF378768.1 | AF168927.1             | AY140302.1 |            | AF069225.1 | AY673056.1 |
| Zingiberales | Cannaceae        | <i>Canna indica</i>              | AF378763.1 | AF168892.1             | AM114724.1 |            | D29784.1   |            |
| Zingiberales | Cannaceae        | <i>Canna flaccida</i>            |            |                        |            |            |            | AF205521.1 |
| Poales       | Typhaceae        | <i>Sparganium americanum</i>     | 343405     |                        |            |            |            |            |
| Poales       | Typhaceae        | <i>Sparganium eurycarpum</i>     |            | 42559027               |            |            | 532650     |            |
| Poales       | Typhaceae        | <i>Sparganium glomeratum</i>     |            |                        |            | 62511851   |            |            |
| Poales       | Typhaceae        | <i>Typha latifolia</i>           | DQ069503.1 | DQ069347.1             | DQ069587.1 |            | AF168880.1 |            |
| Poales       | Typhaceae        | <i>Typha domingensis</i>         |            |                        |            |            |            | AY079520.1 |
| Poales       | Bromeliaceae     | <i>Vriesea psittacina</i>        | 53831785   |                        |            |            |            |            |
| Poales       | Bromeliaceae     | <i>Vriesea splendens</i>         |            | 89242555               |            |            |            |            |
| Poales       | Bromeliaceae     | <i>Vriesea monstrem</i>          |            |                        |            | 53831317   |            |            |
| Poales       | Bromeliaceae     | <i>Puya raimondii</i>            | AF206814   | AF209661               | FJ968207   |            | AF207001   |            |
| Poales       | Rapateaceae      | <i>Stegolepis ligulata</i>       | 53831743   |                        |            | 53831255   |            |            |
| Poales       | Rapateaceae      | <i>Stegolepis sp.</i>            |            | 89242553               |            |            |            |            |
| Poales       | Xyridaceae       | <i>Xyris jupicai</i>             | AY465698   | AY465541               |            |            |            |            |
| Poales       | Xyridaceae       | <i>Xyris difformis</i>           |            |                        |            |            | AF168881   |            |
| Poales       | Xyridaceae       | <i>Xyris laxifolia</i>           |            |                        |            |            |            | AF466386   |
| Poales       | Eriocaulaceae    | <i>Eriocaulon microcephalus</i>  | L10252.2   |                        |            |            |            |            |
| Poales       | Eriocaulaceae    | <i>Eriocaulon compressum</i>     |            | EU832854.1             |            |            |            |            |
| Poales       | Eriocaulaceae    | <i>Eriocaulon septangulare</i>   |            |                        | AY952430.1 |            | AY952402.1 |            |
| Poales       | Eriocaulaceae    | <i>Eriocaulon decangulare</i>    |            |                        |            |            |            | AY079519.1 |
| Poales       | Mayacaceae       | <i>Mayaca fluviatilis</i>        | AF036885.1 | AJ419148.1, AF168929.1 |            |            |            | AF293855.1 |
| Poales       | Mayacaceae       | <i>Mayaca aubletti</i>           |            |                        |            |            | AF168859.1 |            |
| Poales       | Juncaceae        | <i>Juncus effusus</i>            | AY216612.1 | AJ235509.2             | AB088803.1 |            | AF206944.1 | AF205520.1 |
| Poales       | Cyperaceae       | <i>Rhynchospora nervosa</i>      | Y12977.1   | AF209667.1             |            |            | AF207009.1 |            |
| Poales       | Cyperaceae       | <i>Rhynchospora alba</i>         |            |                        |            | JN894695.1 |            |            |
| Poales       | Cyperaceae       | <i>Rhynchospora latifolia</i>    |            |                        |            |            |            | AF205518.1 |
| Poales       | Cyperaceae       | <i>Cyperus alternifolius</i>     | AM999802.1 |                        | AY952421.1 |            | AY952404.1 |            |
| Poales       | Cyperaceae       | <i>Cyperus albostratus</i>       |            | AF168906.1             |            |            |            |            |
| Poales       | Anarthriaceae    | <i>Anarthria polyphylla</i>      | AF148760.1 |                        |            | DQ257498.2 |            |            |
| Poales       | Anarthriaceae    | <i>Anarthria scabra</i>          |            | AJ419129.1             |            |            |            |            |
| Poales       | Anarthriaceae    | <i>Anarthria humilis</i>         |            |                        |            |            |            | AF466389.1 |
| Poales       | Restionaceae     | <i>Restio tetraphyllus</i>       | AF206816.1 |                        | AF164379.1 |            | AF207006.1 | AF486829.1 |
| Poales       | Restionaceae     | <i>Restio paludosus</i>          |            | AJ419152.1             |            |            |            |            |
| Poales       | Centrolepidaceae | <i>Centrolepis strigosa</i>      | AJ286558.1 | AJ419131.1             | DQ257507.2 |            |            | AF466388.1 |
| Poales       | Flagellariaceae  | <i>Flagellaria indica</i>        | AF206769   | AJ419141               | AB040214   |            | AF206913   |            |
| Poales       | Joinvilleaceae   | <i>Joinvillea plicata</i>        | EF423010   | EF422979               |            |            |            |            |

|                 |                  |                                  |            |             |            |            |            |
|-----------------|------------------|----------------------------------|------------|-------------|------------|------------|------------|
| Poales          | Joinvilleaceae   | <i>Joinvillea ascendens</i>      |            |             | AF164380   | AF168855   |            |
| Poales          | Ecdeiocoleaceae  | <i>Ecdeiocolea monostachya</i>   | AF148773   | AJ419136    | DQ257530   | GQ497573.1 | AF466387   |
| Poales          | Poaceae          | <i>Oryza sativa</i>              | D00207.1   | AB037543    | EU434287   | AF069218   |            |
| Poales          | Poaceae          | <i>Oryza longistaminata</i>      |            |             |            |            | AY097328.1 |
| Poales          | Poaceae          | <i>Hordeum vulgare</i>           | 61378650   | 11582       |            |            |            |
| Poales          | Poaceae          | <i>Hordeum murinum</i>           |            |             | 27544095   |            |            |
| Poales          | Poaceae          | <i>Hordeum bulbosum</i>          |            |             |            | X53792.1   |            |
| Poales          | Poaceae          | <i>Danthonia californica</i>     | EF423004   | EF422972    |            |            |            |
| Poales          | Poaceae          | <i>Danthonia spicata</i>         |            |             | AF164409   |            |            |
| Poales          | Poaceae          | <i>Danthonia californica</i>     |            |             |            |            | EU400689   |
| Poales          | Poaceae          | <i>Saccharum officinarum</i>     | 144583483  | NC_006084.1 | 194021757  | 472232     |            |
| Poales          | Poaceae          | <i>Zea mays</i>                  | 18035      | NC_001666.2 | 62868807   | 471990     | 28022.2    |
| Ceratophyllales | Ceratophyllaceae | <i>Ceratophyllum demersum</i>    | D89473.1   | AJ235430.2  | AF543732.1 | U42517.1   | AY095456.1 |
| Ranunculales    | Eupteleaceae     | <i>Euptelea polyandra</i>        | L12645.2   | AF528850.1  | DQ401348.1 | L75831.1   | AF389249.1 |
| Ranunculales    | Eupteleaceae     | <i>Euptelea pleiosperma</i>      |            |             | 121491023  |            |            |
| Ranunculales    | Papaveraceae     | <i>Eschscholzia californica</i>  | 2687476    | 29726129    | GU266597.1 | 115490334  |            |
| Ranunculales    | Papaveraceae     | <i>Hypecoum imberbe</i>          | 2687482    | 14718079    | GU266596.1 | 6706966    | 22595036   |
| Ranunculales    | Papaveraceae     | <i>Dicentra eximia</i>           | L37917.2   |             | DQ182345.1 | L37908.1   | AF389262.1 |
| Ranunculales    | Papaveraceae     | <i>Dicentra chrysantha</i>       |            | AJ235454.2  |            |            |            |
| Ranunculales    | Circaeasteraceae | <i>Kingdonia uniflora</i>        | AF093719.1 | AF092115.1  | FJ626519.1 | AF094537.1 | AF389245.1 |
| Ranunculales    | Circaeasteraceae | <i>Circaeaster agrestis</i>      | FJ626607.1 | AF092116.1  | GU266594.1 | AF094538.1 | AF389246.1 |
| Ranunculales    | Lardizabalaceae  | <i>Decaisnea insignis</i>        | 229464427  |             | 229464285  |            |            |
| Ranunculales    | Lardizabalaceae  | <i>Decaisnea fargesii</i>        |            | 25990326    |            | 904097     | 22595027   |
| Ranunculales    | Lardizabalaceae  | <i>Sargentodoxa cuneata</i>      | 229464429  | 6017831     | 89242583   | 1479997    | 66969208   |
| Ranunculales    | Lardizabalaceae  | <i>Lardizabala biternata</i>     | D85693.1   | L37929.1    | AY437809.1 | L37910.1   | DQ008618.1 |
| Ranunculales    | Lardizabalaceae  | <i>Akebia quinata</i>            | L12627.2   | AF209523.1  | AB069851.1 | L37905.1   | AF389253.1 |
| Ranunculales    | Menispermaceae   | <i>Menispermum dauricum</i>      | 224830669  |             |            |            |            |
| Ranunculales    | Menispermaceae   | <i>Menispermum canadense</i>     |            | 6017807     | GU266604.1 | 2924752    | 22595030   |
| Ranunculales    | Menispermaceae   | <i>Tinospora sinensis</i>        | 229464423  |             | 134039086  |            |            |
| Ranunculales    | Menispermaceae   | <i>Tinospora smilacina</i>       |            | 224830593   |            |            |            |
| Ranunculales    | Menispermaceae   | <i>Tinospora caffra</i>          |            |             |            | 904164     | 22595031   |
| Ranunculales    | Menispermaceae   | <i>Cocculus trilobus</i>         | L12642.2   | AF197614.1  |            | AF197581.1 | DQ008617.1 |
| Ranunculales    | Menispermaceae   | <i>Cocculus laurifolius</i>      |            |             | AF542588.2 |            |            |
| Ranunculales    | Menispermaceae   | <i>Cissampelos pareira</i>       | AF197590.1 | AF197613.1  | AJ966802.1 | AF293758.1 | DQ008616.1 |
| Ranunculales    | Ranunculaceae    | <i>Glaucidium palmatum</i>       | AF093723.1 | AF093375.1  | AB069850.1 | AF094545.1 | AF389267.1 |
| Ranunculales    | Ranunculaceae    | <i>Hydrastis canadensis</i>      | L75849.2   | AF093382.1  | AB069849.1 | L75828.1   | AF389268.1 |
| Ranunculales    | Ranunculaceae    | <i>Xanthorhiza simplicissima</i> | L12669.2   | AF093394.1  | AB069848.1 | L75839.1   | AF389270.1 |
| Ranunculales    | Ranunculaceae    | <i>Ranunculus acris</i>          | AY395557.1 |             | AY954199.1 |            |            |
| Ranunculales    | Ranunculaceae    | <i>Ranunculus macranthus</i>     |            | DQ069346.1  |            |            |            |

|                 |                  |                                   |            |            |                     |            |            |            |
|-----------------|------------------|-----------------------------------|------------|------------|---------------------|------------|------------|------------|
| Ranunculales    | Ranunculaceae    | <i>Ranunculus sceleratus</i>      |            |            |                     |            | EF526357.1 |            |
| Ranunculales    | Ranunculaceae    | <i>Ranunculus keniensis</i>       |            |            |                     |            |            | AF389269.1 |
| Ranunculales    | Berberidaceae    | <i>Mahonia bealei</i>             | L12657.2   | AF197611.1 |                     |            | AF293755.1 | DQ008613.1 |
| Ranunculales    | Berberidaceae    | <i>Mahonia japonica</i>           |            |            | AF542585.1          |            |            |            |
| Ranunculales    | Berberidaceae    | <i>Caulophyllum thalictroides</i> | AF190442.1 | AF092108.1 | AB069831.1          | L54064.1   |            | AF389240.1 |
| Ranunculales    | Berberidaceae    | <i>Nandina domestica</i>          | DQ923117.1 | DQ923117.1 | AB069830.1          | L37911.1   |            | AF389241.1 |
| Ranunculales    | Berberidaceae    | <i>Podophyllum peltatum</i>       | AF197591.1 | AF092109.1 | AF542586.1          | L24413.1   |            | DQ008614.1 |
| Sabiales        | Sabiaceae        | <i>Sabia swinhoei</i>             | 229464451  | 6017829    |                     | 1479995    |            | 22595045   |
| Sabiales        | Sabiaceae        | <i>Sabia japonica</i>             |            |            | 121491027           |            |            |            |
| Sabiales        | Sabiaceae        | <i>Meliosma veitchiorum</i>       | AF206793.1 | AF209626.1 | AJ581449.1          | AF206961.1 |            | AF389271.1 |
| Sabiales        | Sabiaceae        | <i>Meliosma cuneifolia</i>        |            |            | 121491029           |            |            |            |
| Proteales       | Nelumbonaceae    | <i>Nelumbo lutea</i>              | DQ182337.1 | AF528853.1 |                     |            | AF094556.1 | AF389259.1 |
| Proteales       | Nelumbonaceae    | <i>Nelumbo nucifera</i>           | 229464449  |            |                     | AF543740.1 |            |            |
| Proteales       | Platanaceae      | <i>Platanus occidentalis</i>      | AF081073.1 | AF528858.1 | AF543747.1          | U42794.1   |            | AF274662.1 |
| Proteales       | Proteaceae       | <i>Petrophile biloba</i>          | 4098553    |            |                     |            |            |            |
| Proteales       | Proteaceae       | <i>Petrophile circinata</i>       |            | 3850921    |                     |            |            |            |
| Proteales       | Proteaceae       | <i>Petrophile canescens</i>       |            |            | 166156327           | 15428397   |            | 66969198   |
| Proteales       | Proteaceae       | <i>Roupala macrophylla</i>        | 6017866    |            |                     | 6706972    |            | 22595038   |
| Proteales       | Proteaceae       | <i>Roupala montana</i>            |            | 194267336  | 166156338           |            |            |            |
| Proteales       | Proteaceae       | <i>Grevillea robusta</i>          | AF197589.1 |            |                     |            | AF197577.1 |            |
| Proteales       | Proteaceae       | <i>Grevillea baileyana</i>        |            | AF060434.1 |                     |            |            |            |
| Proteales       | Proteaceae       | <i>Grevillea banksii</i>          |            |            | AF542583.2          |            |            | DQ008612.1 |
| Trochodendrales | Trochodendraceae | <i>Trochodendron aralioides</i>   | L01958     | AF093423   | GQ998807            | AH001800   |            | AF479205   |
| Trochodendrales | Trochodendraceae | <i>Tetracentron sinense</i>       | L12668     | AF093422   | AF274633, 121491011 | U42814     |            | AF274670   |
| Buxales         | Didymelaceae     | <i>Didymeles perrieri</i>         | AF061994.1 | AF092119.1 | DQ401354.1          | AF094541.1 |            | AF389247.1 |
| Buxales         | Buxaceae         | <i>Pachysandra procumbens</i>     | AF061993.1 |            |                     | AF094533.1 |            | DQ008607.1 |
| Buxales         | Buxaceae         | <i>Pachysandra terminalis</i>     |            | AF528854.1 | AF542581.2          |            |            |            |
| Buxales         | Buxaceae         | <i>Buxus sempervirens</i>         | DQ182333.1 | AF092110.1 | AF543728.1          | X16599.1   |            | AF389243.1 |
| Gunnerales      | Gunneraceae      | <i>Gunnera hamiltonii</i>         | AF093724.1 | AF093374.1 |                     |            |            |            |
| Gunnerales      | Gunneraceae      | <i>Gunnera perpensa</i>           |            |            | AY042596.1          |            |            |            |
| Gunnerales      | Gunneraceae      | <i>Gunnera tinctoria</i>          |            |            | 121491015           |            |            |            |
| Gunnerales      | Gunneraceae      | <i>Gunnera manicata</i>           |            |            |                     | U43787.1   |            | AF389250.1 |
| Gunnerales      | Myrothamnaceae   | <i>Myrothamnus flabellifolius</i> | AF060707.1 | AF093386.1 | AM396507.1          | AF094555.1 |            | AF479223.1 |
| Gunnerales      | Myrothamnaceae   | <i>Myrothamnus moschata</i>       |            |            | AF542591.2          |            |            |            |
| Dilleniales     | Dilleniaceae     | <i>Dillenia indica</i>            | L01903.2   |            |                     |            |            |            |
| Dilleniales     | Dilleniaceae     | <i>Dillenia retusa</i>            |            | AF095732.1 |                     |            |            | AF479096.1 |
| Dilleniales     | Dilleniaceae     | <i>Hibbertia volubilis</i>        | AF093721   | AF092120   |                     | AF094542   |            |            |
| Dilleniales     | Dilleniaceae     | <i>Hibbertia cuneiformis</i>      |            |            | HQ896421            |            |            | HQ843451   |
| Dilleniales     | Dilleniaceae     | <i>Tetracera asiatica</i>         | AJ235796   | AJ235622   | AY042665            | AJ235982   |            | AF479097   |
| Santalales      | Couaceae         | <i>Ochanostachys amentacea</i>    | DQ790146.1 |            | DQ790183.1          | DQ790116.1 |            |            |
| Santalales      | Couaceae         | <i>Miquartia guianensis</i>       | DQ790148.1 |            | DQ790185.1          | L24396.1   |            |            |

|                   |                    |                                   |            |            |                       |                    |            |
|-------------------|--------------------|-----------------------------------|------------|------------|-----------------------|--------------------|------------|
| Santalales        | Coulaceae          | <i>Coula edulis</i>               | DQ790147.1 |            | DQ790184.1            |                    |            |
| Santalales        | Olacaceae          | <i>Heisteria parvifolia</i>       | AJ131771   | AJ235492   | DQ790199              |                    | DQ790232   |
| Santalales        | Olacaceae          | <i>Heisteria concinna</i>         |            |            |                       | L24146             |            |
| Santalales        | Olacaceae          | <i>Ximenia americana</i>          | GQ997898   | GQ997862   | GQ997871              | L24428             | DQ790220   |
| Santalales        | Santalaceae        | <i>Santalum album</i>             | L26077.1   | AJ235592.2 | AY042650.1            | L24416.1           | AY957453.1 |
| Santalales        | Santalaceae        | <i>Osyris lanceolata</i>          | L11196.2   | AF209641.1 |                       | L24409.1           | AF389274.1 |
| Santalales        | Santalaceae        | <i>Osyris quadripartita</i>       |            |            | AY042623.1            |                    |            |
| Santalales        | Opiliaceae         | <i>Opilia sp.</i>                 | AJ131773.1 | AJ235550.2 | AY042621.1            |                    |            |
| Santalales        | Opiliaceae         | <i>Opilia amantaceae</i>          |            |            |                       | U42790.1           | AF479095.1 |
| Santalales        | Loranthaceae       | <i>Gaiadendron punctatum</i>      | 532000     |            | 111145144             | 532585             | 112408972  |
| Santalales        | Schoepfiaceae      | <i>Schoepfia schreberi</i>        | L11205.2   | AF209671.1 | AY957454.1, 111145148 | AF207017.1, 532648 | AF389261.1 |
| Santalales        | Misodendraceae     | <i>Misodendrum linearifolium</i>  | L26074.1   |            | DQ787438.1            | L24397.2           | DQ790211.1 |
| Santalales        | Misodendraceae     | <i>Misodendrum punctulatum</i>    |            |            | DQ787443.1            |                    |            |
| Berberidopsidales | Berberidopsidaceae | <i>Berberidopsis corallina</i>    | AJ235773.1 | AJ235409.2 | EU002171.1            | AF206866.1         | AF389242.1 |
| Berberidopsidales | Aextoxicaceae      | <i>Aextoxicon punctatum</i>       | X83986     | AJ235384.2 | DQ182342.1            | AF206839.1         | AF389239.1 |
| Caryophyllales    | Nepenthaceae       | <i>Nepenthes alata</i>            | L01936.2   | AJ235542.2 |                       |                    |            |
| Caryophyllales    | Nepenthaceae       | <i>Nepenthes madagascariensis</i> |            |            | AF315883.1            |                    |            |
| Caryophyllales    | Nepenthaceae       | <i>Nepenthes sp.</i>              |            |            |                       | U42787.1           | AF389260.1 |
| Caryophyllales    | Droseraceae        | <i>Drosera capensis</i>           | L01909.2   | AY096110.1 | AY096122              | U42532.1           | AF389248.1 |
| Caryophyllales    | Droseraceae        | <i>Drosera regia</i>              |            |            | AF204848.1            |                    |            |
| Caryophyllales    | Drosophyllaceae    | <i>Drosophyllum lusitanicum</i>   | L01907     | AY096113   | AY042580              | AY096119           | HQ843447   |
| Caryophyllales    | Ancistrocladaceae  | <i>Ancistrocladus korupensis</i>  | AF206733   | AF209526   |                       | AF206846           | HQ843441   |
| Caryophyllales    | Ancistrocladaceae  | <i>Ancistrocladus abbreviatus</i> |            |            | AF315939              |                    |            |
| Caryophyllales    | Dioncophyllaceae   | <i>Triphyophyllum peltatum</i>    | Z97637.1   | AF209693.1 | AF315940.1            | AF207049.1         | AF479091.1 |
| Caryophyllales    | Frankeniaceae      | <i>Frankenia pulverulenta</i>     | Z97638     | AJ235476   |                       | AF206914           | HQ843448   |
| Caryophyllales    | Frankeniaceae      | <i>Frankenia laevis</i>           |            |            | AF204862              |                    |            |
| Caryophyllales    | Tamaricaceae       | <i>Tamarix pentandra</i>          | Z97650.1   | AF209684.1 | AY042663              | AF207033.1         | AF479083.1 |
| Caryophyllales    | Tamaricaceae       | <i>Tamarix gallica</i>            |            |            | AF204861.1            |                    |            |
| Caryophyllales    | Polygonaceae       | <i>Fagopyrum statice</i>          | 3983621    |            |                       |                    |            |
| Caryophyllales    | Polygonaceae       | <i>Fagopyrum esculentum</i>       |            | EU254477.1 |                       |                    |            |
| Caryophyllales    | Polygonaceae       | <i>Polygonum aviculare</i>        | AF297127.1 |            | EF438020              |                    |            |
| Caryophyllales    | Polygonaceae       | <i>Polygonum sachalinense</i>     |            | AJ235569.2 |                       |                    | AF479085.1 |
| Caryophyllales    | Polygonaceae       | <i>Polygonum alpinum</i>          |            |            | AF204858.1            |                    |            |
| Caryophyllales    | Polygonaceae       | <i>Polygonum sp.</i>              |            |            |                       | AF206996.1         |            |
| Caryophyllales    | Plumbaginaceae     | <i>Limonium gibertii</i>          | AJ786659   |            |                       |                    |            |
| Caryophyllales    | Plumbaginaceae     | <i>Limonium arborescens</i>       |            | AF209620   |                       | AF206953           | HQ843453   |
| Caryophyllales    | Plumbaginaceae     | <i>Limonium latifolium</i>        |            |            | AY514861              |                    |            |
| Caryophyllales    | Plumbaginaceae     | <i>Plumbago auriculata</i>        | M77701.1   |            | EU002187              | U42795.1           | AF036492.1 |
| Caryophyllales    | Plumbaginaceae     | <i>Plumbago zeylanica</i>         |            | AJ235565.2 |                       |                    |            |
| Caryophyllales    | Plumbaginaceae     | <i>Plumbago indica</i>            |            |            | AF204857.1            |                    |            |
| Caryophyllales    | Rhabdodendraceae   | <i>Rhabdodendron amazonicum</i>   | Z97649.1   | AJ235578.2 |                       | AF207007.1         | HQ843460.1 |

|                |                        |                                   |            |            |                    |            |                      |  |
|----------------|------------------------|-----------------------------------|------------|------------|--------------------|------------|----------------------|--|
| Caryophyllales | Rhabdodendraceae       | <i>Rhabdodendron macrophyllum</i> |            |            | AY042642.1         |            |                      |  |
| Caryophyllales | Simmondsiaceae         | <i>Simmondsia chinensis</i>       | AF093732   | AF093401   | AF204863, AY042657 | AF094562   | HQ843463.1           |  |
| Caryophyllales | Physenaceae            | <i>Physena sp.</i>                | Y13116     |            |                    |            |                      |  |
| Caryophyllales | Physenaceae            | <i>Physena madagascariensis</i>   |            | HQ843260   |                    | HQ843434   | HQ843458             |  |
| Caryophyllales | Asteropeiaceae         | <i>Asteropeia micraster</i>       | AF206737.1 | AF209533.1 | AY042549.1         | AF206857.1 | AF479090.1           |  |
| Caryophyllales | Caryophyllaceae        | <i>Stellaria media</i>            | AF206823.1 | AF209680.1 | AY936299           | AF207027.1 | AF479084.1           |  |
| Caryophyllales | Caryophyllaceae        | <i>Stellaria nemorum</i>          |            |            | AY936298.1         |            |                      |  |
| Caryophyllales | Achatocarpaceae        | <i>Phaulothamnus spinescens</i>   | M97887     | HQ843259   | AF542594           | HQ843433   | HQ843457             |  |
| Caryophyllales | Amaranthaceae          | <i>Spinacia oleracea</i>          | AJ400848   | AF528861   | NC_002202          | L24420     | HQ843464             |  |
| Caryophyllales | Amaranthaceae          | <i>Beta vulgaris</i>              | DQ074969   | DQ067451   | DQ116790           |            |                      |  |
| Caryophyllales | Amaranthaceae          | <i>Celosia argentea</i>           | AY270072.1 | AF209559.1 |                    | AF206883.1 |                      |  |
| Caryophyllales | Amaranthaceae          | <i>Celosia trigyna</i>            |            |            | AY514811.1         |            |                      |  |
| Caryophyllales | Amaranthaceae          | <i>Celosia cristata</i>           |            |            |                    |            | HQ843444.1           |  |
| Caryophyllales | Stegospermataceae      | <i>Stegnosperma halimifolium</i>  | M62571     |            | HQ878442           |            | HQ843465             |  |
| Caryophyllales | Limeaceae              | <i>Limeum aethiopicum</i>         | AF132095   |            |                    |            |                      |  |
| Caryophyllales | Limeaceae              | <i>Limeum sp.</i>                 |            | AF093385   |                    | AF094554   |                      |  |
| Caryophyllales | Limeaceae              | <i>Limeum africanum</i>           |            |            | AY042608           |            | HQ843452             |  |
| Caryophyllales | Lophiocarpaceae        | <i>Corbichonia decumbens</i>      | AF132096.1 | GQ497648.1 | FN825760.1         | GQ497577.1 |                      |  |
| Caryophyllales | Barbeuiaceae           | <i>Barbeuia madagascarensis</i>   | GQ497673.1 |            | 15340899           |            |                      |  |
| Caryophyllales | Aizoaceae              | <i>Lampranthus filicaulis</i>     | 125857478  |            |                    |            |                      |  |
| Caryophyllales | Aizoaceae              | <i>Lampranthus blandus</i>        |            |            | FN597631.1         |            |                      |  |
| Caryophyllales | Aizoaceae              | <i>Delosperma echinatum</i>       | AJ235778   | AJ235452   | AY042575           |            |                      |  |
| Caryophyllales | Aizoaceae              | <i>Delosperma napiforme</i>       |            |            |                    | HQ843428   | HQ8434461            |  |
| Caryophyllales | Gisekiaceae            | <i>Gisekia pharnacioides</i>      | M97890     |            |                    |            |                      |  |
| Caryophyllales | Gisekiaceae            | <i>Gisekia africana</i>           |            |            | AY042591           |            | HQ843449             |  |
| Caryophyllales | Sarcobataceae          | <i>Sarcobatus vermiculatus</i>    | AF132088   | HQ843262   | AY042652           | GQ497586.1 | HQ843462             |  |
| Caryophyllales | Phytolaccaceae         | <i>Phytolacca americana</i>       | M62567.1   | AF528855.1 | DQ401362.1         | AF094557.1 | HQ843459.1           |  |
| Caryophyllales | Phytolaccaceae         | <i>Rivina humilis</i>             | M62569     | HQ843261   | AY042646           | HQ843438   | HQ843461             |  |
| Caryophyllales | Nyctaginaceae          | <i>Mirabilis jalapa</i>           | M62565.1   | AF209629.1 | FN868307.1         | U42788.1   | HQ843454, AF479086.1 |  |
| Caryophyllales | Nyctaginaceae          | <i>Bougainvillea glabra</i>       | M88340.1   | AJ235415.2 |                    | AF206873.1 |                      |  |
| Caryophyllales | Nyctaginaceae          | <i>Bougainvillea sp.</i>          |            |            | AY042560           |            |                      |  |
| Caryophyllales | Nyctaginaceae          | <i>Bougainvillea spectabilis</i>  |            |            |                    |            | HQ843443             |  |
| Caryophyllales | unassigned Hypertellis | <i>Hypertelis spergulacea</i>     | FN824420.1 |            | FN825700.1         |            |                      |  |
| Caryophyllales | Molluginaceae          | <i>Mollugo verticillata</i>       | M62566.1   | AF209631.1 | AY936330.1         | U42828.1   | AF479088.1           |  |
| Caryophyllales | Montiaceae             | <i>Claytonia perfoliata</i>       | AF132093   |            |                    |            |                      |  |
| Caryophyllales | Montiaceae             | <i>Claytonia virginica</i>        |            | HQ843256   |                    | HQ843427   | HQ843445             |  |
| Caryophyllales | Montiaceae             | <i>Claytonia caroliniana</i>      |            |            | AY764099           |            |                      |  |
| Caryophyllales | Talinaceae             | <i>Talinum paniculatum</i>        | GQ436529   | HQ843263   | GQ434150           | HQ843439   | HQ843466             |  |
| Caryophyllales | Portulacaceae          | <i>Portulaca grandiflora</i>      | M62568.1   | AF209659.1 |                    | AF207000.1 | AF479093.1           |  |

|                |                  |                               |                |            |                         |                |            |
|----------------|------------------|-------------------------------|----------------|------------|-------------------------|----------------|------------|
| Caryophyllales | Portulacaceae    | <i>Portulaca oleracea</i>     |                |            | AF204867.1,<br>DQ855850 |                |            |
| Caryophyllales | Cactaceae        | <i>Opuntia dillenii</i>       | AY875233       |            |                         |                |            |
| Caryophyllales | Cactaceae        | <i>Opuntia microdasys</i>     |                | HQ843258   |                         | HQ843432       | HQ843456   |
| Caryophyllales | Cactaceae        | <i>Opuntia quimilo</i>        |                |            | AY015279                |                |            |
| Caryophyllales | Cactaceae        | <i>Pereskia aculeata</i>      | AF206805.1     | AF209648.1 | DQ855863.1              | AF206986.1     | AF479092.1 |
| Caryophyllales | Halophytaceae    | <i>Halophytum ameghinoi</i>   | AJ403024       | HQ843257   | AY042599                | HQ843429       | HQ843450   |
| Caryophyllales | Didieraceae      | <i>Alluaudia procera</i>      | 336270         |            |                         | GQ497645.<br>1 |            |
| Caryophyllales | Didieraceae      | <i>Alluaudia ascendens</i>    |                |            | AY042541                |                | HQ843440   |
| Caryophyllales | Basellaceae      | <i>Anredera cordifolia</i>    | HM849777.<br>1 |            | HM851012.<br>1          |                |            |
| Caryophyllales | Basellaceae      | <i>Anredera baselloides</i>   |                | HQ620741.1 |                         |                |            |
| Caryophyllales | Basellaceae      | <i>Anredera brachystachys</i> |                |            | FN597626.1              |                |            |
| Caryophyllales | Basellaceae      | <i>Basella alba</i>           | M62564         | HQ8432541  | AY042553                | HQ843426       | HQ843442   |
| Cornales       | Hydrostachyaceae | <i>Hydrostachys multifida</i> | U17879.1       |            | AB038179.1              |                | AY260021.1 |
| Cornales       | Hydrostachyaceae | <i>Hydrostachys imbricata</i> |                | AJ236230.1 |                         | AJ235983.1     |            |
| Cornales       | Nyssaceae        | <i>Nyssa ogeche</i>           | L11228.2       |            | U96886.1                | U52032.1       | AF297545.1 |
| Cornales       | Nyssaceae        | <i>Nyssa sylvatica</i>        |                | AJ235545.2 |                         |                |            |
| Cornales       | Nyssaceae        | <i>Nyssa sp.</i>              |                |            | 85679045                |                |            |
| Cornales       | Nyssaceae        | <i>Camptotheca acuminata</i>  | L11211.2       | AF209554.1 | U96888.1                | U42789.1       | AY260010.1 |
| Cornales       | Cornaceae        | <i>Cornus mas</i>             | L11216.2       | AF528848.1 | AJ429275.1              |                | AF297535.1 |
| Cornales       | Cornaceae        | <i>Cornus officinalis</i>     |                |            |                         | U52033.1       |            |
| Cornales       | Cornaceae        | <i>Alangium chinense</i>      | L11209.2       |            |                         | AF206843.1     | AY260009.1 |
| Cornales       | Cornaceae        | <i>Alangium sp.</i>           |                | AJ235386.2 |                         |                |            |
| Cornales       | Cornaceae        | <i>Alangium platanifolium</i> |                |            | U96880.1                |                |            |
| Cornales       | Grubbiaceae      | <i>Grubbia tormentosa</i>     | Z83141.1       | JF298839.1 |                         |                | AY260020.1 |
| Cornales       | Grubbiaceae      | <i>Grubbia rosmarinifolia</i> |                |            | AJ429276.1              |                |            |
| Cornales       | Curtisiaceae     | <i>Curtisia dentata</i>       | L11222.2       | JF298838.1 | U96901.1                | L16007.1       | AY260012.1 |
| Cornales       | Hydrangeaceae    | <i>Fendlera rupicola</i>      | AF206766.1     | AJ236234.1 | AY254063.1              | AJ235986.1     | AY260041.1 |
| Cornales       | Hydrangeaceae    | <i>Philadelphus lewisii</i>   | L11198.2       | AJ236231.1 |                         | U42782.1       | AF389252.1 |
| Cornales       | Hydrangeaceae    | <i>Philadelphus hirsutus</i>  |                |            | U96881.1                |                |            |
| Cornales       | Hydrangeaceae    | <i>Hydrangea macrophylla</i>  | L11187.2       | AF528852.1 |                         | U42781.1       |            |
| Cornales       | Hydrangeaceae    | <i>Hydrangea paniculata</i>   |                |            | AB236029.1              |                |            |
| Cornales       | Hydrangeaceae    | <i>Hydrangea arborescens</i>  |                |            |                         |                | AY260032.1 |
| Cornales       | Loasaceae        | <i>Eucnide lobata</i>         | U17874.1       |            |                         |                |            |
| Cornales       | Loasaceae        | <i>Eucnide bartonoides</i>    |                | AJ236227.1 |                         | AJ235988.1     |            |
| Cornales       | Loasaceae        | <i>Eucnide urens</i>          |                |            | AF503315.1              |                | AY260031.1 |
| Cornales       | Loasaceae        | <i>Mentzelia decapetala</i>   | 643626         |            |                         |                | 30230599   |
| Cornales       | Loasaceae        | <i>Mentzelia lindleyi</i>     |                | 6688707    |                         | 6688701        |            |
| Cornales       | Loasaceae        | <i>Mentzelia reflexa</i>      |                |            | 33867458                |                |            |
| Cornales       | Loasaceae        | <i>Petalonyx nitidus</i>      | AF299086.1     | AJ236232.1 |                         | AJ235989.1     | AY260028.1 |
| Cornales       | Loasaceae        | <i>Petalonyx crenatus</i>     |                |            | AF503295.1              |                |            |
| Ericales       | Marcgraviaceae   | <i>Marcgravia rectiflora</i>  | Z83148.1       | AJ235529.1 |                         |                | AY727937.1 |
| Ericales       | Marcgraviaceae   | <i>Marcgravia sp.</i>         |                |            | AJ429289.1              |                |            |
| Ericales       | Tetrameristaceae | <i>Tetramerista sp.</i>       | Z80199.1       | AJ235623.2 | AJ429304.1              | AF207039.1     | AF479153.1 |
| Ericales       | Balsaminaceae    | <i>Impatiens repens</i>       | Z80197.1       | AJ235503.2 |                         |                | AF479154.1 |

|          |                           |                                 |            |            |            |            |            |
|----------|---------------------------|---------------------------------|------------|------------|------------|------------|------------|
| Ericales | Balsaminaceae             | <i>Impatiens capensis</i>       |            |            | AJ429280.1 |            |            |
| Ericales | Balsaminaceae             | <i>Impatiens pallida</i>        |            |            |            | L24148.1   |            |
| Ericales | Lecythidaceae             | <i>Couroupita guianensis</i>    | Z80181     | AJ236224   |            | AJ235993   | AY727950   |
| Ericales | Lecythidaceae             | <i>Barringtonia asiatica</i>    | Z80174.1   | AY725929.1 | DQ924095.1 |            | AY727949.1 |
| Ericales | Lecythidaceae             | <i>Barringtonia racemosa</i>    | AF088853.1 |            |            | AY289647.1 |            |
| Ericales | Fouquieriaceae            | <i>Fouquieria fasciculata</i>   | AY725862   | AY725924   |            |            | AY727940   |
| Ericales | Fouquieriaceae            | <i>Fouquieria splendens</i>     |            |            | U96903     | L49280     |            |
| Ericales | Fouquieriaceae            | <i>Fouquieria diguetii</i>      |            |            | 22795826   |            |            |
| Ericales | Polemoniaceae             | <i>Cobaea scandens</i>          | Z83143.1   | AJ235440.2 | L48568.1   | L49277.1   | AY727944.1 |
| Ericales | Polemoniaceae             | <i>Gilia aggregata</i>          | Z83144.1   |            |            |            |            |
| Ericales | Polemoniaceae             | <i>Gilia capitata</i>           |            | AJ236220.1 |            |            | AF479155.1 |
| Ericales | Polemoniaceae             | <i>Gilia sinuata</i>            |            |            | L34198.1   |            |            |
| Ericales | Polemoniaceae             | <i>Gilia reticulata</i>         |            |            |            | DQ080013.1 |            |
| Ericales | Polemoniaceae             | <i>Polemonium reptans</i>       | L11687     |            |            |            |            |
| Ericales | Polemoniaceae             | <i>Polemonium pauciflorum</i>   |            | AY725925   |            |            |            |
| Ericales | Polemoniaceae             | <i>Polemonium pulcherrimum</i>  |            |            | 22797432   |            |            |
| Ericales | Polemoniaceae             | <i>Polemonium californicum</i>  |            |            |            | L49294     |            |
| Ericales | Polemoniaceae             | <i>Polemonium caeruleum</i>     |            |            |            |            | AY056516   |
| Ericales | Polemoniaceae             | <i>Phlox longifolia</i>         | AF206809.1 | AJ236221.1 |            |            |            |
| Ericales | Polemoniaceae             | <i>Phlox gracilis</i>           |            |            | L34203.1   |            |            |
| Ericales | Polemoniaceae             | <i>Phlox hoodii</i>             |            |            |            | L49293.1   |            |
| Ericales | Polemoniaceae             | <i>Phlox divaricata</i>         |            |            |            |            | AF148281.1 |
| Ericales | Sapotaceae                | <i>Manilkara zapota</i>         | AF213793.1 | AJ235528.1 | DQ924092.1 | L49288.1   | AY727946.1 |
| Ericales | Ebenaceae                 | <i>Lissocarpa benthamii</i>     | EU980793.1 | DQ923969.1 | DQ924077.1 |            | AY727956.1 |
| Ericales | Ebenaceae                 | <i>Euclea crispa</i>            | EU980789.1 | DQ923966.1 | DQ924073.1 | GU476413.1 |            |
| Ericales | Ebenaceae                 | <i>Diospyros lotus</i>          | EU980703.1 | DQ923924.1 | AB174992.1 |            | AY727957.1 |
| Ericales | Ebenaceae                 | <i>Diospyros digyna</i>         |            | AF213768.1 |            |            |            |
| Ericales | Ebenaceae                 | <i>Diospyros cauliflora</i>     |            |            | DQ924001.1 |            |            |
| Ericales | Ebenaceae                 | <i>Diospyros virginiana</i>     |            |            |            | L49279.1   |            |
| Ericales | Primulaceae (Myrsinaceae) | <i>Anagallis arvensis</i>       | M88343.1   |            |            |            |            |
| Ericales | Primulaceae               | <i>Anagallis tenella</i>        |            | AJ235390.2 | AJ581446.1 | AF206845.1 | AF479149.1 |
| Ericales | Primulaceae               | <i>Maesa myrsinoides</i>        | Z80203     |            |            |            |            |
| Ericales | Primulaceae               | <i>Maesa tenera</i>             |            | AF213781   | 22797100   |            |            |
| Ericales | Primulaceae               | <i>Maesa japonica</i>           |            |            |            |            | AY727959   |
| Ericales | Primulaceae               | <i>Clavija domingensis</i>      | AF213818   |            |            |            |            |
| Ericales | Primulaceae               | <i>Clavija eggersiana</i>       |            | AJ235437   |            |            | AF479151   |
| Ericales | Primulaceae               | <i>Clavija costaricana</i>      |            |            | JQ588865.1 |            |            |
| Ericales | Primulaceae               | <i>Clavija integrifolia</i>     |            |            |            | AJ235998   |            |
| Ericales | Primulaceae               | <i>Primula sieboldii</i>        | U96657     | AF213787   |            |            |            |
| Ericales | Primulaceae               | <i>Primula forrestii</i>        |            |            | 87197564   |            |            |
| Ericales | Primulaceae               | <i>Primula sp.</i>              |            |            |            | L49295     |            |
| Ericales | Primulaceae               | <i>Primula elatior</i>          |            |            |            |            | AY727960   |
| Ericales | Primulaceae               | <i>Androsace erecta</i>         | AF395004.1 |            |            |            |            |
| Ericales | Primulaceae               | <i>Androsace sp.</i>            |            | AF213775.1 |            |            |            |
| Ericales | Primulaceae               | <i>Androsace sempervivoides</i> |            |            | AY647535.1 |            |            |



|                          |                         |                                    |            |            |            |            |            |
|--------------------------|-------------------------|------------------------------------|------------|------------|------------|------------|------------|
| Ericales                 | Primulaceae             | <i>Androsace spinulifera</i>       |            |            |            | AF206847.1 | AF479150.1 |
| Ericales                 | Pentaphragaceae         | <i>Ternstroemia stahlii</i>        | AF206827.1 | AF209687.1 |            | AF207038.1 | AY727955.1 |
| Ericales                 | Pentaphragaceae         | <i>Ternstroemia longipes</i>       |            |            | AF380110.1 |            |            |
| Ericales                 | Pentaphragaceae         | <i>Eurya chinensis</i>             | AF089714.1 |            |            |            |            |
| Ericales                 | Pentaphragaceae         | <i>Eurya sp.</i>                   |            | AF420969.1 |            |            |            |
| Ericales                 | Pentaphragaceae         | <i>Eurya japonica</i>              |            |            | AF380081.1 |            | AY727953.1 |
| Ericales                 | Pentaphragaceae         | <i>Eurya emarginata</i>            |            |            |            | AJ235995.1 |            |
| Ericales                 | Theaceae                | <i>Camellia sinensis</i>           | AF380037.1 | AY725933.1 | AF380077.1 | AB120309.1 | AY727975.1 |
| Ericales                 | Symplocaceae            | <i>Symplocos zizyphoides</i>       | AY725865.1 | AY725934.1 |            |            | AY727978.1 |
| Ericales                 | Symplocaceae            | <i>Symplocos wikstroemiifolia</i>  |            |            | AY336346.1 |            |            |
| Ericales                 | Symplocaceae            | <i>Symplocos paniculata</i>        |            |            |            | U43297.1   |            |
| Ericales                 | Diapensiaceae           | <i>Galax aphylla</i>               | Z80184.1   |            |            |            |            |
| Ericales                 | Diapensiaceae           | <i>Galax urceolata</i>             |            | AY725936.1 | L48576.1   | L49281.1   | AY727983.1 |
| Ericales                 | Styracaceae             | <i>Styrax chinensis</i>            | AF396157.1 |            |            |            |            |
| Ericales                 | Styracaceae             | <i>Styrax japonica</i>             | Z80189     |            |            |            | AF479156.1 |
| Ericales                 | Styracaceae             | <i>Styrax officinalis</i>          |            | AF420984.1 | DQ924099.1 |            |            |
| Ericales                 | Styracaceae             | <i>Styrax americana</i>            |            |            |            | U43296.1   |            |
| Ericales                 | Styracaceae             | <i>Halesia carolina</i>            | Z80190.1   | DQ923988.1 | DQ924097.1 |            | AY727981.1 |
| Ericales                 | Styracaceae             | <i>Halesia tetraptera</i>          |            |            |            | L49284.1   |            |
| Ericales                 | Sarraceniaceae          | <i>Sarracenia flava</i>            | L01952.2   | AJ235594.2 |            |            |            |
| Ericales                 | Sarraceniaceae          | <i>Sarracenia purpurea</i>         |            |            | AJ429296.1 | U42804.1   | AY260044.1 |
| Ericales                 | Roridulaceae            | <i>Roridula gorgonias</i>          | L01950.2   | AJ236180.1 | AJ429294.1 | AF207010.1 | AY727965.1 |
| Ericales                 | Actinidiaceae           | <i>Actinidia chinensis</i>         | L01882.2   | AJ235382.2 | U61324.1   | AF419792.1 |            |
| Ericales                 | Actinidiaceae           | <i>Actinidia arguta</i>            |            |            |            |            | AY727964.1 |
| Ericales                 | Clethraceae             | <i>Clethra alnifolia</i>           | L12609.2   |            | AJ429281.1 | AF419793.1 |            |
| Ericales                 | Clethraceae             | <i>Clethra arborea</i>             |            | AF420965.1 |            |            |            |
| Ericales                 | Clethraceae             | <i>Clethra cf. ferruginea</i>      |            |            |            |            | AY727968.1 |
| Ericales                 | Cyrillaceae             | <i>Cyrilla racemiflora</i>         | L01900.2   | AJ235449.2 | AJ429282.1 | U43294.1   | AY727969.1 |
| Ericales                 | Ericaceae               | <i>Enkianthus campanulatus</i>     | L12616.2   | AF420968.1 | U61344.2   | AF419802.1 | AY727970.1 |
| Ericales                 | Ericaceae               | <i>Arbutus canariensis</i>         | L12597     |            | U61345     |            |            |
| Ericales                 | Ericaceae               | <i>Arbutus unedo</i>               |            | AF266738   |            | AF206853   | DQ067894   |
| Ericales                 | Ericaceae               | <i>Vaccinium uliginosum</i>        | AF421107.1 | AF420987.1 |            |            |            |
| Ericales                 | Ericaceae               | <i>Vaccinium scoparium</i>         |            |            | AF419716.1 |            |            |
| Ericales                 | Ericaceae               | <i>Vaccinium macrocarpon</i>       |            |            |            | L49297.2   |            |
| Ericales                 | Ericaceae               | <i>Vaccinium myrtillus</i>         |            |            |            |            | AY727974.1 |
| Ericales                 | Ericaceae               | <i>Rhododendron hippophaeoides</i> | L01949.2   |            |            | AF419807.1 |            |
| Ericales                 | Ericaceae               | <i>Rhododendron impeditum</i>      |            | AY725932.1 |            |            | AY727973.1 |
| Ericales                 | Ericaceae               | <i>Rhododendron wadanum</i>        |            |            | AB012746.1 |            |            |
| unassigned Icacinaeae    | Icacinaeae              | <i>Icacina mannii</i>              | 17135962   | AF209603   | HQ384577   | 7595455    |            |
| Garryales                | Eucommiaceae            | <i>Eucommia ulmoides</i>           | L01917     | HQ384789   | AJ429317   | HQ384682   |            |
| Garryales                | Garryaceae              | <i>Garrya elliptica</i>            | L01919.2   | AJ235479.2 | AJ429319.1 | U4250.1    | AF479181.1 |
| Garryales                | Garryaceae (Aucubaceae) | <i>Aucuba japonica</i>             | L11210.2   | AJ235402.2 | AJ429318.1 | U42522.1   | AY727931.1 |
| unassigned Oncothecaceae | Oncothecaceae           | <i>Oncotheca balansae</i>          | AJ131950   | AJ235549   | AJ581439   | AF206976   |            |
| unassigned Vahliaceae    | Vahliaceae              | <i>Vahlia capensis</i>             | L11208.2   | AJ236217.1 | AJ429316.1 | U42813.1   | AF479182.1 |

|             |                   |                                |            |            |                   |            |            |
|-------------|-------------------|--------------------------------|------------|------------|-------------------|------------|------------|
| Solanales   | Montiniaceae      | <i>Montinia caryophyllacea</i> | L11194.2   | AY100852.1 | AJ429359.1        | U42808.1   | AF479175.1 |
| Solanales   | Sphenocleaceae    | <i>Sphenoclea zeylanica</i>    | L18798     | HQ384778   | AJ429360          | GQ497585.1 |            |
| Solanales   | Hydroleaceae      | <i>Hydrolea ovata</i>          | L14293.1   | AJ236184.1 | AJ429356.1        | AJ236014.1 | AF479177.1 |
| Solanales   | Convolvulaceae    | <i>Cuscuta subinclusa</i>      | 32468854   |            |                   |            |            |
| Solanales   | Convolvulaceae    | <i>Cuscuta sandwichiana</i>    |            | 21633448   |                   |            |            |
| Solanales   | Convolvulaceae    | <i>Cuscuta japonica</i>        |            |            | 165910534         |            |            |
| Solanales   | Convolvulaceae    | <i>Cuscuta gronovii</i>        |            |            |                   | 532575     |            |
| Solanales   | Convolvulaceae    | <i>Cuscuta cuspidata</i>       |            |            |                   |            | AF148273.1 |
| Solanales   | Convolvulaceae    | <i>Ipomea alba</i>             | AY100963.1 | AY100754.1 |                   |            |            |
| Solanales   | Convolvulaceae    | <i>Ipomea purpurea</i>         |            | EU118126   |                   |            |            |
| Solanales   | Convolvulaceae    | <i>Ipomea batatas</i>          |            |            | AJ429355.1        |            |            |
| Solanales   | Convolvulaceae    | <i>Ipomea hederacea</i>        |            |            |                   | U38310.1   |            |
| Solanales   | Convolvulaceae    | <i>Ipomea lacunosa</i>         |            |            |                   |            | AF146016.1 |
| Solanales   | Solanaceae        | <i>Petunia hybrida</i>         | X04976.1   |            |                   |            |            |
| Solanales   | Solanaceae        | <i>Petunia axillaris</i>       |            | AJ236182.1 |                   | AJ236020.1 | AF479174.1 |
| Solanales   | Solanaceae        | <i>Petunia scheideana</i>      |            |            | AB262070.1        |            |            |
| Solanales   | Solanaceae        | <i>Solanum dulcamara</i>       | 241993465  |            |                   |            |            |
| Solanales   | Solanaceae        | <i>Solanum chilense</i>        |            | 237783986  |                   |            |            |
| Solanales   | Solanaceae        | <i>Solanum oedipus</i>         |            |            | 209864945         |            |            |
| Solanales   | Solanaceae        | <i>Solanum petrophilum</i>     |            |            |                   | 21360      |            |
| Solanales   | Solanaceae        | <i>Atropa belladonna</i>       | 237784030  | 237783992  | 156628783         |            |            |
| Solanales   | Solanaceae        | <i>Nolana spathulata</i>       | U08616.1   |            |                   |            |            |
| Solanales   | Solanaceae        | <i>Nolana humifusa</i>         |            | AF209638.1 |                   | AJ236017.1 | AF148272.1 |
| Solanales   | Solanaceae        | <i>Nolana albescens</i>        |            |            | AB036647.1        |            |            |
| Solanales   | Solanaceae        | <i>Nicotiana tabacum</i>       | Z00044.2   | AF035909.1 |                   | AJ236016.1 | AF479172.1 |
| Solanales   | Solanaceae        | <i>Nicotiana acaulis</i>       |            |            | AB039985.1        |            |            |
| Gentianales | Rubiaceae         | <i>Luculia gratissima</i>      | 211573234  | HQ384771   | AJ429325          |            |            |
| Gentianales | Rubiaceae         | <i>Coffea arabica</i>          | X83631     | AJ235441   | DQ401346          | EU650386.1 | EU650384   |
| Gentianales | Rubiaceae         | <i>Galium aparine</i>          | X81091     |            | HQ384560          | HQ384689   |            |
| Gentianales | Rubiaceae         | <i>Galium septentrionale</i>   |            | X81669     |                   |            |            |
| Gentianales | Rubiaceae         | <i>Mitchella repens</i>        | AF190440   | AF209630   | HQ593366.1        | U42802     | AF148279   |
| Gentianales | Loganiaceae       | <i>Strychnos nux-vomica</i>    | L14410     | AJ235613   | Z70193            |            |            |
| Gentianales | Loganiaceae       | <i>Spigelia marilandica</i>    | L14007     | AF209679   |                   | AJ236024   |            |
| Gentianales | Loganiaceae       | <i>Spigelia sp.</i>            |            |            | EF077198          |            |            |
| Gentianales | Gelsemiaceae      | <i>Gelsemium sempervirens</i>  | L14397     | AJ236193   | HQ384556          | AJ236025   |            |
| Gentianales | Apocynaceae       | <i>Nerium oleander</i>         | AJ002886.1 | AJ236189.1 | Z98173.1          | AF107572.1 | AF479178.1 |
| Gentianales | Gentianaceae      | <i>Gentiana procera</i>        | L14398     |            |                   |            |            |
| Gentianales | Gentianaceae      | <i>Gentiana saponaria</i>      |            | JF298870   |                   |            | JF321128   |
| Gentianales | Gentianaceae      | <i>Gentiana purpurea</i>       |            |            | AJ429323          |            |            |
| Gentianales | Gentianaceae      | <i>Gentiana asclepiadea</i>    |            |            |                   | HQ448773   |            |
| Gentianales | Gentianaceae      | <i>Exacum affine</i>           | L11684     | AJ236195   | FJ014087, 4456077 | AJ236023   | AF479180   |
| Boraginales | Boraginaceae      | <i>Borago officinalis</i>      | L11680.1   | AJ235414.2 | AJ429308.1        | AF107580.1 | AF479179.1 |
| Boraginales | Boraginaceae      | <i>Hydrophyllum capitatum</i>  | HQ384926   | HQ384784   | HQ384574          | HQ384691   |            |
| Boraginales | Boraginaceae      | <i>Ehretia acuminata</i>       | GQ997264   |            | GQ997226          | HQ384690   |            |
| Boraginales | Boraginaceae      | <i>Ehretia cymosa</i>          |            | 24940181   |                   |            |            |
| Lamiales    | Plocospermataceae | <i>Plocosperma buxifolium</i>  | Z68829     | HQ384756   | AJ429315          | HQ384684.1 |            |
| Lamiales    | Oleaceae          | <i>Olea europaea</i>           | DQ673304.1 | AJ236163.1 | AJ429335.1        | L49289.1   | AF479171.1 |
| Lamiales    | Oleaceae          | <i>Syringa vulgaris</i>        | DQ673303   | HQ384751   | HQ384544          | HQ384685.1 |            |

|          |                  |                                         |                |            |            |                       |            |
|----------|------------------|-----------------------------------------|----------------|------------|------------|-----------------------|------------|
| Lamiales | Oleaceae         | <i>Jasminum<br/>suavissimum</i>         | 7240290        |            |            | 6688488               |            |
| Lamiales | Oleaceae         | <i>Jasminum<br/>polyanthum</i>          |                | 8452687    |            |                       |            |
| Lamiales | Oleaceae         | <i>Jasminum<br/>nudiflorum</i>          |                |            | 32811725   |                       |            |
| Lamiales | Tetrachondraceae | <i>Polypremum<br/>procumbens</i>        | AJ011989.1     | HQ384749   | AJ429351.1 |                       |            |
| Lamiales | unplaced         | <i>Peltanthera<br/>floribunda</i>       | HQ384900       | HQ384748   | AJ429330   |                       | AY423082   |
| Lamiales | Calceolariaceae  | <i>Calceolaria sp.</i>                  | HQ384899       | HQ384746   |            |                       |            |
| Lamiales | Calceolariaceae  | <i>Calceolaria<br/>pennellii</i>        |                |            | 44845004   |                       |            |
| Lamiales | Calceolariaceae  | <i>Calceolaria<br/>integrifolia</i>     |                |            |            | GQ497569.<br>1        |            |
| Lamiales | Calceolariaceae  | <i>Calceolaria<br/>arachnoidea</i>      |                |            |            |                       | 41323876   |
| Lamiales | Gesneriaceae     | <i>Titanotrichum<br/>oldhamii</i>       | AF206829       | AJ236171   |            | AJ236054              | AY423085   |
| Lamiales | Gesneriaceae     | <i>Rhynchoglossum<br/>notonianum</i>    | AF170244.1     | AJ236170   |            | AJ236052              | AF479164   |
| Lamiales | Gesneriaceae     | <i>Rhynchoglossum<br/>gardneri</i>      |                |            |            | FN773555              |            |
| Lamiales | Stilbaceae       | <i>Halleria lucida</i>                  | AF026828       | HQ384732.1 |            |                       |            |
| Lamiales | Stilbaceae       | <i>Halleria tetragona</i>               |                |            | 57901546   |                       |            |
| Lamiales | Plantaginaceae   | <i>Antirrhinum majus</i>                | L11688         | AJ235395   | AJ235395   | AJ236047              | 41323870   |
| Lamiales | Plantaginaceae   | <i>Veronica arguta</i>                  | AY034025.1     |            |            |                       |            |
| Lamiales | Plantaginaceae   | <i>Veronica anagallis-<br/>aquatica</i> |                | AJ236169.1 |            | AF207052.1            | AF479169.1 |
| Lamiales | Plantaginaceae   | <i>Veronica arvensis</i>                |                |            |            | AF052003.1            |            |
| Lamiales | Plantaginaceae   | <i>Plantago<br/>lanceolata</i>          | L36454.1       | AF209656.1 |            | AJ236046.1            |            |
| Lamiales | Plantaginaceae   | <i>Plantago argentea</i>                |                |            | AJ429344.1 |                       |            |
| Lamiales | Plantaginaceae   | <i>Plantago virginica</i>               |                |            |            |                       | AF148277.1 |
| Lamiales | Scrophulariaceae | <i>Myoporum<br/>mauritanium</i>         | L36445.1       | AJ236166.1 |            | AJ236036.1            | AF479170.1 |
| Lamiales | Scrophulariaceae | <i>Myoporum<br/>montanum</i>            |                |            |            | AF531808.1            |            |
| Lamiales | Scrophulariaceae | <i>Verbascum<br/>thapsus</i>            | L36452.1       | AJ236177.1 | AF052002.1 | AF207051.1            | AF479168.1 |
| Lamiales | Scrophulariaceae | <i>Scrophularia sp.</i>                 | L36449.1       |            |            |                       |            |
| Lamiales | Scrophulariaceae | <i>Scrophularia<br/>californica</i>     | HQ384892       | AJ236175.1 |            | AJ236031.1            |            |
| Lamiales | Scrophulariaceae | <i>Scrophularia<br/>peregrina</i>       |                |            |            | AF375185.1            |            |
| Lamiales | Scrophulariaceae | <i>Scrophularia<br/>canina</i>          |                |            |            |                       | AY423080.1 |
| Lamiales | Martyniaceae     | <i>Martynia annua</i>                   | HQ384889.<br>1 | HQ384730   | HQ384524   |                       |            |
| Lamiales | Pedaliaceae      | <i>Sesamum indicum</i>                  | HQ384882       | HQ384721   | AJ429340   | AJ236041              |            |
| Lamiales | Bignoniaceae     | <i>Catalpa sp.</i>                      | 336744         |            |            |                       |            |
| Lamiales | Bignoniaceae     | <i>Catalpa aff.<br/>speciosa</i>        |                | HQ384724   | HQ384519   |                       |            |
| Lamiales | Bignoniaceae     | <i>Catalpa<br/>bignonioides</i>         |                |            |            |                       | AF107579   |
| Lamiales | Bignoniaceae     | <i>Campsis radicans</i>                 | AF102642       | AJ236168   | AF531775   | AF107578              |            |
| Lamiales | Byblidaceae      | <i>Byblis liniflora</i>                 | L01891.2       | HQ384703   | AJ429354.1 | L15195.2,<br>HQ384686 |            |
| Lamiales | Byblidaceae      | <i>Byblis gigantea</i>                  |                | AJ236181.1 |            |                       | AF479141.1 |
| Lamiales | Lentibulariaceae | <i>Pinguicula<br/>moranensis</i>        | HQ384871       | HQ384704   | HQ384501   | HQ384687              |            |
| Lamiales | Lentibulariaceae | <i>Utricularia biflora</i>              | L13190         | AJ235636   |            |                       |            |
| Lamiales | Lentibulariaceae | <i>Utricularia alpina</i>               |                |            | AF531822   |                       |            |
| Lamiales | Lentibulariaceae | <i>Utricularia sp.</i>                  |                |            |            |                       | AJ236044   |
| Lamiales | Acanthaceae      | <i>Thunbergia<br/>usambarica</i>        | L12596.1       |            |            |                       |            |

|               |                   |                                   |            |            |                      |            |            |
|---------------|-------------------|-----------------------------------|------------|------------|----------------------|------------|------------|
| Lamiales      | Acanthaceae       | <i>Thunbergia coccinea</i>        |            | AJ235625.2 |                      |            |            |
| Lamiales      | Acanthaceae       | <i>Thunbergia alata</i>           |            |            | AF531811.1           | AF107569.1 |            |
| Lamiales      | Acanthaceae       | <i>Acanthus montanus</i>          | L12592     | HQ384715   | HQ384511             |            |            |
| Lamiales      | Acanthaceae       | <i>Acanthus ebracteatus</i>       |            |            |                      | AY289642   |            |
| Lamiales      | Acanthaceae       | <i>Justicia americana</i>         | L14401     | AJ236178   |                      | AF107568   | AF479165   |
| Lamiales      | Acanthaceae       | <i>Justicia arborescens</i>       |            |            | JQ586382.1           |            |            |
| Lamiales      | Acanthaceae       | <i>Barleria prionitis</i>         | L01886     | AJ236179   |                      | AF107567   | AF479166   |
| Lamiales      | Acanthaceae       | <i>Barleria rotundifolia</i>      |            |            | JF270654.1           |            |            |
| Lamiales      | Thomandersiaceae  | <i>Thomandersia laurifolia</i>    | AY919280   | HQ384719   | HQ384515             |            |            |
| Lamiales      | Verbenaceae       | <i>Verbena bonariensis</i>        | L14412.1   |            |                      |            |            |
| Lamiales      | Verbenaceae       | <i>Verbena bracteata</i>          | HQ384875   | HQ384711   | HQ384506             | AJ236042.1 |            |
| Lamiales      | Verbenaceae       | <i>Verbena scabridoglandulosa</i> |            | AJ235639.2 |                      |            | AF479167.1 |
| Lamiales      | Verbenaceae       | <i>Verbena rigida</i>             |            |            | AJ429353.1           |            |            |
| Lamiales      | Lamiaceae         | <i>Lamium amplexicaule</i>        | AB266225   | AJ236165   |                      | L49287     |            |
| Lamiales      | Lamiaceae         | <i>Lamium album</i>               |            |            | AJ429332             |            |            |
| Lamiales      | Lamiaceae         | <i>Callicarpa dichotoma</i>       | L14393     | AF209551   |                      | AJ236048   |            |
| Lamiales      | Lamiaceae         | <i>Callicarpa stapfii</i>         |            |            | FM163265             |            |            |
| Lamiales      | Paulowniaceae     | <i>Paulownia tomentosa</i>        | L36447.1   | AJ236174.1 | AJ429339.1           | AJ236039.1 | JF321129.1 |
| Lamiales      | Orobanchaceae     | <i>Pedicularis foliosa</i>        | HQ384873   |            |                      |            |            |
| Lamiales      | Orobanchaceae     | <i>Pedicularis coronata</i>       |            | AF209646.1 |                      |            |            |
| Lamiales      | Orobanchaceae     | <i>Pedicularis iwatensis</i>      |            |            | AB280514.1           |            |            |
| Lamiales      | Orobanchaceae     | <i>Pedicularis racemosa</i>       |            |            |                      | U59959.1   |            |
| Lamiales      | Phrymaceae        | <i>Phryma leptostachya</i>        | U28881     | HQ384710   | AJ429341             | HQ384688   |            |
| Lamiales      | Mazaceae          | <i>Mazus stachydidifolius</i>     | EU348860.1 |            |                      |            |            |
| Lamiales      | Mazaceae          | <i>Mazus reptans</i>              |            | HQ384705.1 |                      |            |            |
| Lamiales      | Mazaceae          | <i>Mazus rugosus</i>              |            |            | FN773547.1           |            |            |
| Lamiales      | Mazaceae          | <i>Mazus pumilus</i>              |            |            |                      | GU359050.1 | AF148278.1 |
| Aquifoliales  | Aquifoliaceae     | <i>Ilex cornuta</i>               | GQ997347.1 | GQ997300.1 |                      |            |            |
| Aquifoliales  | Aquifoliaceae     | <i>Ilex opaca</i>                 |            |            | GQ248140.1, EF590403 | AF161010.1 | AF479203.1 |
| Aquifoliales  | Phyllonomaceae    | <i>Phyllonoma laticuspis</i>      | L11201     | AJ236216   |                      | U42546     |            |
| Aquifoliales  | Phyllonomaceae    | <i>Phyllonoma ruscifolia</i>      |            |            | AJ429377             |            |            |
| Aquifoliales  | Helwingiaceae     | <i>Helwingia japonica</i>         | GQ436764   | AF209596   | AJ430195             | U42524     |            |
| Aquifoliales  | Helwingiaceae     | <i>Helwingia sp.</i>              |            |            |                      |            | GQ983586   |
| Aquifoliales  | Stemonuraceae     | <i>Gomphandra javanica</i>        | AJ402954   | GQ983598   | GQ983651             |            |            |
| Aquifoliales  | Stemonuraceae     | <i>Irvingbaileya sp.</i>          | AF156733   | AJ236219   |                      | AJ235999   | AF479202   |
| Aquifoliales  | Cardiopteridaceae | <i>Citronella suaveolens</i>      |            | GQ983606   | GQ983648             |            |            |
| Aquifoliales  | Cardiopteridaceae | <i>Gonocaryum litorale</i>        | AJ235779   | AJ235484   | GQ983654             | AF206919   | AF479201   |
| Aquifoliales  | Cardiopteridaceae | <i>Cardiopteris quinqueloba</i>   | AJ402936   |            | AJ429310             |            |            |
| Aquifoliales  | Cardiopteridaceae | <i>Cardiopteris sp.</i>           |            | GQ983618   |                      | GQ983562   | GQ983581   |
| Escalloniales | Escalloniaceae    | <i>Polyosma cunninghamii</i>      | AF299091   | AJ419680   | AJ429368             |            |            |

|               |                    |                                        |            |            |                       |            |            |
|---------------|--------------------|----------------------------------------|------------|------------|-----------------------|------------|------------|
| Escalloniales | Escalloniaceae     | <i>Polyosma sp.</i>                    |            |            |                       | GQ983575   |            |
| Escalloniales | Escalloniaceae     | <i>Anopterus macleayanus</i>           | Y10673     |            | GQ983639              |            |            |
| Escalloniales | Escalloniaceae     | <i>Anopterus glandulosus</i>           |            | AJ419683   |                       |            |            |
| Escalloniales | Escalloniaceae     | <i>Eremosyne pectinata</i>             | L47969     | AJ236215   | AJ429364              | U42807     |            |
| Escalloniales | Escalloniaceae     | <i>Escallonia calcottiae</i>           | AJ419693   |            |                       |            |            |
| Escalloniales | Escalloniaceae     | <i>Escallonia rubra</i>                |            | AJ318974   | AJ429365              |            |            |
| Escalloniales | Escalloniaceae     | <i>Escallonia coquimbensis</i>         |            |            |                       | U42544     | GQ983585   |
| Escalloniales | Escalloniaceae     | <i>Valdivia gayana</i>                 | 39725410   | 18077606   | GQ983642              |            |            |
| Escalloniales | Escalloniaceae     | <i>Forgesia racemosa</i>               | AJ575923   | AJ419678   | GQ983661              |            |            |
| Asterales     | Pentaphragmataceae | <i>Pentaphragma ellipticum</i>         | L18794     | AJ318980   | AJ429387              |            |            |
| Asterales     | Pentaphragmataceae | <i>Pentaphragma sp.</i>                |            |            |                       | GQ983574   |            |
| Asterales     | Rousseaceae        | <i>Roussea simplex</i>                 | AF084477.1 | AJ235586.2 | AJ429389.1            | U42548.1   | AF479243.1 |
| Asterales     | Rousseaceae        | <i>Carpodetus serratus</i>             | 2385356    | 15425561   | 22795876              | GQ983563   |            |
| Asterales     | Rousseaceae        | <i>Cuttsia viburnea</i>                | 2385361    | 15425565   | GQ983640              | GU476392.1 |            |
| Asterales     | Rousseaceae        | <i>Abrophyllum ornans</i>              | 1304273    | 15422201   | GQ983653              |            |            |
| Asterales     | Campanulaceae      | <i>Pseudonemacladus oppositifolius</i> | AJ318992   | EU437600   | GQ983646              |            |            |
| Asterales     | Campanulaceae      | <i>Dialypetalum sp.</i>                | AJ318991   | AJ318972   | GQ983649              |            |            |
| Asterales     | Campanulaceae      | <i>Lobelia sp.</i>                     | L01931.2   |            |                       |            |            |
| Asterales     | Campanulaceae      | <i>Lobelia angulata</i>                |            | AJ235524.1 |                       |            |            |
| Asterales     | Campanulaceae      | <i>Lobelia cardinalis</i>              |            |            | GQ248149.1, 197257900 |            |            |
| Asterales     | Campanulaceae      | <i>Lobelia erinus</i>                  |            |            |                       | U42785.1   |            |
| Asterales     | Campanulaceae      | <i>Lobelia puberula</i>                |            |            |                       |            | AF148276.1 |
| Asterales     | Campanulaceae      | <i>Cyphia elata</i>                    | EU713371   |            |                       |            |            |
| Asterales     | Campanulaceae      | <i>Cyphia rogersii</i>                 |            | AJ318970   |                       |            |            |
| Asterales     | Campanulaceae      | <i>Cyphia decora</i>                   |            |            | GQ983652              |            |            |
| Asterales     | Campanulaceae      | <i>Campanula trachelium</i>            | DQ356118   | AJ235423   |                       |            |            |
| Asterales     | Campanulaceae      | <i>Trachelium caeruleum</i>            |            |            | EU713328              |            |            |
| Asterales     | Campanulaceae      | <i>Campanula ramosa</i>                | L13861.1   | AJ235423.2 |                       |            |            |
| Asterales     | Campanulaceae      | <i>Campanula elatines</i>              |            |            | AJ430387.1            |            |            |
| Asterales     | Campanulaceae      | <i>Campanula ramulosa</i>              |            |            |                       | U42510.1   |            |
| Asterales     | Campanulaceae      | <i>Campanula trachelium</i>            |            |            |                       |            | AF479191.1 |
| Asterales     | Phellinaceae       | <i>Phelline billardieri</i>            | AJ238346.1 |            |                       | AF206989.1 |            |
| Asterales     | Phellinaceae       | <i>Phelline comosa</i>                 | X69748     | AJ235557.1 |                       |            | AF479188.1 |
| Asterales     | Phellinaceae       | <i>Phelline lucida</i>                 |            |            | AJ429388.1            |            |            |
| Asterales     | Argophyllaceae     | <i>Argophyllum sp.</i>                 | 1304277    | AJ318965   | 22795870              |            |            |
| Asterales     | Argophyllaceae     | <i>Argophyllum laxum</i>               |            |            |                       |            | GQ983580   |
| Asterales     | Argophyllaceae     | <i>Corokia cotoneaster</i>             | L11221.2   | AJ235445.2 | AY491646.1            | U42523.1   | AF479187.1 |
| Asterales     | Alseuosmiaceae     | <i>Platyspermation crassifolium</i>    | AJ419700   | AJ419689   |                       |            |            |
| Asterales     | Alseuosmiaceae     | <i>Crispiloba disperma</i>             | 1304285    | 15425563   | GQ983650              |            |            |
| Asterales     | Alseuosmiaceae     | <i>Wittsteinia vacciniacea</i>         | X87399     | AJ318986   |                       |            |            |
| Asterales     | Alseuosmiaceae     | <i>Wittsteinia panderi</i>             |            |            | GQ983647              |            |            |

|           |                |                                      |            |            |            |            |            |
|-----------|----------------|--------------------------------------|------------|------------|------------|------------|------------|
| Asterales | Alseuosmiaceae | <i>Alseuosmia macrophylla</i>        | X87377     | 6686770    | AJ429378   | 7595364    |            |
| Asterales | Alseuosmiaceae | <i>Alseuosmia sp.</i>                |            |            |            |            | GQ983579   |
| Asterales | Stylidaceae    | <i>Donatia fascicularis</i>          | AF307913.1 |            | AJ429384.1 |            |            |
| Asterales | Stylidaceae    | <i>Donatia sp.</i>                   |            | AJ236203.1 |            | AJ236012.1 | AF479189.1 |
| Asterales | Stylidaceae    | <i>Forstera bidwillii</i>            | AJ225055   |            | GQ983645   |            |            |
| Asterales | Stylidaceae    | <i>Forstera bellidifolia</i>         |            | AJ318976   |            |            |            |
| Asterales | Stylidaceae    | <i>Stylidium graminifolium</i>       | L18790     | AJ236201   |            | AJ236011   | GQ983592   |
| Asterales | Stylidaceae    | <i>Stylidium majus</i>               |            |            | AF542576   |            |            |
| Asterales | Menyanthaceae  | <i>Nymphoides peltata</i>            | EF173110   |            | GQ983659   |            |            |
| Asterales | Menyanthaceae  | <i>Nymphoides geminata</i>           |            | AJ236204   |            | 6688858    | 19919627   |
| Asterales | Menyanthaceae  | <i>Villarsia calthifolia</i>         | L11685     |            |            |            |            |
| Asterales | Menyanthaceae  | <i>Villarsia capitata</i>            |            | AJ318984   |            |            |            |
| Asterales | Menyanthaceae  | <i>Villarsia sp.</i>                 |            |            | GQ983655   |            |            |
| Asterales | Menyanthaceae  | <i>Nephrophyllidium crista-galli</i> | EF173095   |            | GQ983644   |            |            |
| Asterales | Menyanthaceae  | <i>Fauria crista-galli</i>           |            | AJ318975   |            |            |            |
| Asterales | Menyanthaceae  | <i>Menyanthes trifoliata</i>         | L14006.2   | AJ235533.2 | AJ429386.1 | AJ236009.1 | AF479185.1 |
| Asterales | Goodeniaceae   | <i>Dampiera spicigera</i>            | X87383     | AJ318971   |            |            |            |
| Asterales | Goodeniaceae   | <i>Dampiera diversifolia</i>         |            |            | GQ983658   |            |            |
| Asterales | Goodeniaceae   | <i>Goodenia ovata</i>                | X87386     | AJ318977   | GQ983643   |            |            |
| Asterales | Goodeniaceae   | <i>Scaevola aemula</i>               | EU017199.1 | EU017162.1 | EU385394   | AJ236008.1 |            |
| Asterales | Goodeniaceae   | <i>Scaevola auriculata</i>           |            |            |            |            | GQ983591.1 |
| Asterales | Calyceraceae   | <i>Boopis anthemoides</i>            | L13860.1   |            |            |            |            |
| Asterales | Calyceraceae   | <i>Boopis graminea</i>               |            | AJ236199.1 | AJ429382.1 | AF107583.1 | AF479184.1 |
| Asterales | Calyceraceae   | <i>Acicarpha tribuloides</i>         | 1304279    | 15422203   | 22795872   |            |            |
| Asterales | Calyceraceae   | <i>Moschopsis rosulata</i>           | X87390     | AJ318979   | GQ983662   |            |            |
| Asterales | Asteraceae     | <i>Barnadesia caryophylla</i>        | 289491     | 14717953   |            |            | AF479246.1 |
| Asterales | Asteraceae     | <i>Barnadesia arborea</i>            |            |            | GQ983656   |            |            |
| Asterales | Asteraceae     | <i>Barnadesia sp.</i>                |            |            |            | 4558886    |            |
| Asterales | Asteraceae     | <i>Gerbera jamesonii</i>             | L13643     | AJ236200   | AF456789   | 4558887    |            |
| Asterales | Asteraceae     | <i>Echinops exaltatus</i>            | 290607     |            | 32364845   |            |            |
| Asterales | Asteraceae     | <i>Echinops bannaticus</i>           |            | 15425573   |            |            |            |
| Asterales | Asteraceae     | <i>Tragopogon pratensis</i>          | AY395563.1 |            |            |            |            |
| Asterales | Asteraceae     | <i>Tragopogon dubius</i>             |            | AJ236197.1 | AJ633258.1 | U42502.1   | AF036493.1 |
| Asterales | Asteraceae     | <i>Lactuca sativa</i>                | 78675147   | 78675147   | 78675147   | 471875     |            |
| Asterales | Asteraceae     | <i>Cichorium intybus</i>             | 289848     | 8452630    | 54021386   |            |            |
| Asterales | Asteraceae     | <i>Tagetes erecta</i>                | L13637     |            |            |            |            |
| Asterales | Asteraceae     | <i>Tagetes sp.</i>                   |            | AJ236206   |            | 1777651    |            |
| Asterales | Asteraceae     | <i>Tagetes patula</i>                |            |            | AF151515   |            |            |
| Asterales | Asteraceae     | <i>Guizotia abyssinica</i>           | NC_010601  | NC_010601  | AM411125   |            |            |
| Asterales | Asteraceae     | <i>Helianthus annuus</i>             | AF097517.1 | AJ236205.1 | DQ383815.1 | AF107577.1 | AF479183.1 |
| Bruniales | Columelliaceae | <i>Columellia oblonga</i>            | Y10675.    | AJ419676   | AJ429362   | GQ983564   |            |
| Bruniales | Columelliaceae | <i>Desfontainia spinosa</i>          | Z29670.1   | AJ419677.1 | AJ429363.1 | GQ983565.  | GQ983582.1 |
| Bruniales | Bruniaceae     | <i>Brunia albiflora</i>              | AY490988   |            |            | 1          | 1          |
| Bruniales | Bruniaceae     | <i>Brunia laevis</i>                 |            | GQ983608   |            |            |            |

|           |                 |                                   |            |            |                       |            |                          |
|-----------|-----------------|-----------------------------------|------------|------------|-----------------------|------------|--------------------------|
| Bruniales | Bruniaceae      | <i>Brunia alopecuroides</i>       |            |            | AY490959              |            |                          |
| Bruniales | Bruniaceae      | <i>Berzelia lanuginosa</i>        | L14391     | AF095731   | AY490955.1            | U42508     |                          |
| Apiales   | Pennantiaceae   | <i>Pennantia corymbosa</i>        | AJ494842   | AJ494840   | AY188404              | GU476405   | AY189099                 |
| Apiales   | Pennantiaceae   | <i>Pennantia cunninghamii</i>     |            |            |                       | GQ983573   |                          |
| Apiales   | Torricelliaceae | <i>Aralidium pinnatifidum</i>     | AF299087   |            | APU58627              |            | AY189036                 |
| Apiales   | Torricelliaceae | <i>Toricellia tiliifolia</i>      | AF299089   |            | AY188410              |            | AY189113                 |
| Apiales   | Torricelliaceae | <i>Melanophylla alnifolia</i>     | U50254.1   | AF209625.1 |                       | AF206960.1 | AY189085.1               |
| Apiales   | Torricelliaceae | <i>Melanophylla sp.</i>           |            |            | AJ429373.1            |            |                          |
| Apiales   | Griselinaceae   | <i>Griselinia littoralis</i>      | AF307916.1 | AJ236213.1 | AJ429372.1            |            |                          |
| Apiales   | Griselinaceae   | <i>Griselinia lucida</i>          |            |            |                       | AF206922.1 | AF479197.1               |
| Apiales   | Pittosporaceae  | <i>Pittosporum japonicum</i>      | L11202     |            |                       | 532222     |                          |
| Apiales   | Pittosporaceae  | <i>Pittosporum verrucosum</i>     |            | AF528857   |                       |            |                          |
| Apiales   | Pittosporaceae  | <i>Pittosporum tobira</i>         |            |            | U58624                |            | 37778912                 |
| Apiales   | Pittosporaceae  | <i>Sollya heterophylla</i>        | U50262.1   | AJ236214.1 | U58625.1              | AJ236001.1 | AY189109.1               |
| Apiales   | Araliaceae      | <i>Hydrocotyle vulgaris</i>       | GQ983666   | GQ983599   | DQ133792              |            |                          |
| Apiales   | Araliaceae      | <i>Hydrocotyle sibthorpioides</i> |            |            |                       | X16605     |                          |
| Apiales   | Araliaceae      | <i>Hydrocotyle verticillata</i>   |            |            |                       |            | AY189078                 |
| Apiales   | Araliaceae      | <i>Aralia spinosa</i>             | 289043     | GQ983605   | 22795866              |            | 37778827                 |
| Apiales   | Araliaceae      | <i>Panax quinquefolius</i>        | U50250.1   | AJ236210.1 |                       |            | AF479193.1<br>, 37778890 |
| Apiales   | Araliaceae      | <i>Panax ginseng</i>              | 51235292   |            | AB044903.2            |            |                          |
| Apiales   | Araliaceae      | <i>Panax zingiberensis</i>        |            |            |                       | AB085764.1 |                          |
| Apiales   | Araliaceae      | <i>Cussonia spicata</i>           | 1292997    | GQ983596   | 2281238               |            | 37778849                 |
| Apiales   | Araliaceae      | <i>Polyscias guilfoylei</i>       | U50251     | GQ983620   | U58616                |            | AY189102.1               |
| Apiales   | Araliaceae      | <i>Tetraplasandra hawaiiensis</i> | U50257     |            | U58593                |            | 37778904                 |
| Apiales   | Araliaceae      | <i>Tetraplasandra oahuensis</i>   |            | GQ983616   |                       |            |                          |
| Apiales   | Araliaceae      | <i>Pseudopanax arboreus</i>       | 1293017    |            | 2281268               |            | 37778895                 |
| Apiales   | Araliaceae      | <i>Pseudopanax colensoi</i>       |            | GQ983637   |                       |            |                          |
| Apiales   | Araliaceae      | <i>Hedera helix</i>               | L01924.2   | AJ235489.2 | U58612.1,<br>18073960 | U42500.1   | AY189073.1               |
| Apiales   | Araliaceae      | <i>Schefflera arboricola</i>      | U50255     |            | 2281278               |            | 37778900                 |
| Apiales   | Araliaceae      | <i>Schefflera delavayi</i>        |            | GQ983613   |                       |            |                          |
| Apiales   | Araliaceae      | <i>Tetrapanax papyriferus</i>     | U50256     | GQ983624   | GQ434267              |            | 37778903                 |
| Apiales   | Myodocarpaceae  | <i>Myodocarpus involucratus</i>   | AY188430   |            |                       |            | AY189095                 |
| Apiales   | Myodocarpaceae  | <i>Myodocarpus fraxinifolius</i>  |            | GQ983630   |                       | GQ983570   |                          |
| Apiales   | Myodocarpaceae  | <i>Myodocarpus simplicifolius</i> |            |            | AF271754              |            |                          |
| Apiales   | Myodocarpaceae  | <i>Delarbrea michieana</i>        | U50243.1   | AJ236211.1 | U58608.1              | AF107573.1 | AF479196.1               |
| Apiales   | Apiaceae        | <i>Platysace lanceolata</i>       | AY188434   | GQ983628   | GQ983657              |            | AY189101.1               |
| Apiales   | Apiaceae        | <i>Mackinlaya confusa</i>         | AY188426   | GQ983615   | AF271741              | GQ983568   |                          |
| Apiales   | Apiaceae        | <i>Mackinlaya macrosciadia</i>    |            |            |                       |            | AY189083                 |
| Apiales   | Apiaceae        | <i>Azorella selago</i>            | 34559276   |            | 14276784              |            | 37778838                 |

|                |                                |                                    |            |            |            |            |            |
|----------------|--------------------------------|------------------------------------|------------|------------|------------|------------|------------|
| Apiales        | Apiaceae                       | <i>Azorella caespitosa</i>         |            | GQ983635   |            | GQ983561   |            |
| Apiales        | Apiaceae                       | <i>Arctopus echinatus</i>          | AY188414   |            | AF271761   |            | AY189037.1 |
| Apiales        | Apiaceae                       | <i>Arctopus dregei</i>             |            | GQ983621   |            |            |            |
| Apiales        | Apiaceae                       | <i>Sanicula gregari</i>            | L11170     |            | U58589     |            | 37778899   |
| Apiales        | Apiaceae                       | <i>Heteromorpha trifoliata</i>     | HTU50227   |            | HTU58565   |            | 37778866   |
| Apiales        | Apiaceae                       | <i>Heteromorpha arborescens</i>    |            | GQ983611   |            |            |            |
| Apiales        | Apiaceae                       | <i>Daucus carota</i>               | 1374996    | 113200887  | 2281160    |            | 37778850   |
| Apiales        | Apiaceae                       | <i>Coriandrum sativum</i>          | 336618     | GQ983603   | 2281158    |            | AY189056.1 |
| Apiales        | Apiaceae                       | <i>Angelica lucida</i>             | 1292957    |            |            |            | 37778823   |
| Apiales        | Apiaceae                       | <i>Angelica sylvestris</i>         |            | GQ983632   | DQ133783   |            |            |
| Apiales        | Apiaceae                       | <i>Angelica gigas</i>              |            |            |            | 200116396  |            |
| Apiales        | Apiaceae                       | <i>Anethum graveolens</i>          | 156595776  | 156573702  | 156573664  |            |            |
| Apiales        | Apiaceae                       | <i>Apium graveolens</i>            | L01885.2   | AJ235396.2 | AJ429370.1 | AF206852.1 | AF479195.1 |
| Paracryphiales | Paracryphiaceae                | <i>Quintinia verdonii</i>          | AF299092   |            | AJ429366   |            |            |
| Paracryphiales | Paracryphiaceae                | <i>Quintinia quatrefagesii</i>     |            | AJ318983   |            | GQ983576   | GQ983590   |
| Paracryphiales | Paracryphiaceae                | <i>Sphenostemon lobosporus</i>     | AJ403005   | GQ983631.1 | GQ983660.1 |            |            |
| Paracryphiales | Paracryphiaceae                | <i>Paracryphia alticola</i>        | AJ402983   | AJ419679   | AJ429367   | GQ983571   | GQ983589   |
| Dipsacales     | Adoxaceae                      | <i>Viburnum acerifolia</i>         | AF446927.1 |            |            | AJ236007.1 |            |
| Dipsacales     | Adoxaceae                      | <i>Viburnum opulus</i>             |            | AJ235640.2 |            |            |            |
| Dipsacales     | Adoxaceae                      | <i>Viburnum rhytidophyllum</i>     |            |            | AJ429391.1 |            |            |
| Dipsacales     | Adoxaceae                      | <i>Viburnum erosum</i>             |            |            |            |            | JF321130.1 |
| Dipsacales     | Adoxaceae                      | <i>Sambucus racemosa</i>           | 17863820   |            | 20530881   |            |            |
| Dipsacales     | Adoxaceae                      | <i>Sambucus caerulea</i>           |            | GQ983634   |            |            |            |
| Dipsacales     | Adoxaceae                      | <i>Sambucus canadensis</i>         |            |            |            | 11066013   |            |
| Dipsacales     | Adoxaceae                      | <i>Sinadoxa corydalifolia</i>      | AF446929   | GQ983638   | AF446899   |            |            |
| Dipsacales     | Adoxaceae                      | <i>Tetradoxa omeiensis</i>         | AF446931   | GQ983607   | AF446901   |            |            |
| Dipsacales     | Adoxaceae                      | <i>Adoxa moschatellina</i>         | AF446930.1 | GQ983610.1 | AF446900.1 | GQ983560.1 | GQ983578.1 |
| Dipsacales     | Caprifoliaceae (Diervillaceae) | <i>Weigela hortensis</i>           | AF446938   | GQ983609   | AF446908   |            |            |
| Dipsacales     | Caprifoliaceae (Diervillaceae) | <i>Diervilla sessilifolia</i>      | AF446937   | GQ983617   | AF446907   | GQ983566   | GQ983583   |
| Dipsacales     | Caprifoliaceae                 | <i>Heptacodium miconioides</i>     | AF446936   | GQ983604   | AF446906   |            |            |
| Dipsacales     | Caprifoliaceae                 | <i>Lonicera japonica</i>           | EU201192   | GQ983602   |            |            | GQ983587   |
| Dipsacales     | Caprifoliaceae                 | <i>Lonicera orientalis</i>         |            |            | 22796641   |            |            |
| Dipsacales     | Caprifoliaceae                 | <i>Lonicera maackii</i>            |            |            |            | 1857127    |            |
| Dipsacales     | Caprifoliaceae                 | <i>Symphoricarpos albus</i>        | L11682     |            |            | 1777647    | 19919683   |
| Dipsacales     | Caprifoliaceae                 | <i>Symphoricarpos sp.</i>          |            | GQ983633   |            |            |            |
| Dipsacales     | Caprifoliaceae                 | <i>Symphoricarpos occidentalis</i> |            |            | GU168654   |            |            |
| Dipsacales     | Caprifoliaceae                 | <i>Triosteum perfoliatum</i>       | AF446935   | GQ983597   | GQ284972   |            |            |
| Dipsacales     | Caprifoliaceae                 | <i>Leycesteria formosa</i>         | AF446992   | GQ983636   | GQ284975   |            |            |
| Dipsacales     | Caprifoliaceae (Linnaeaceae)   | <i>Linnaea borealis</i>            | AF446941   | GQ983619   | AF446911   |            |            |
| Dipsacales     | Caprifoliaceae (Linnaeaceae)   | <i>Abelia triflora</i>             | AF206727.1 | AJ236209.1 |            | AJ236004.1 | AF479200.1 |



|              |                                   |                                  |            |            |            |            |            |  |
|--------------|-----------------------------------|----------------------------------|------------|------------|------------|------------|------------|--|
| Dipsacales   | Caprifoliaceae<br>(Linnaeaceae)   | <i>Abelia grandiflora</i>        |            |            | AF446909.1 |            |            |  |
| Dipsacales   | Caprifoliaceae<br>(Linnaeaceae)   | <i>Kolkwitzia amabilis</i>       | AJ420877   | GQ983600   | AF446912   |            |            |  |
| Dipsacales   | Caprifoliaceae<br>(Linnaeaceae)   | <i>Dipelta floribunda</i>        | AJ420876   |            |            |            |            |  |
| Dipsacales   | Caprifoliaceae<br>(Linnaeaceae)   | <i>Dipelta yunnanensis</i>       |            | GQ983629   | 20530893   | GQ983567   | GQ983584   |  |
| Dipsacales   | Caprifoliaceae<br>(Morinaceae)    | <i>Morina longifolia</i>         | AF446945   | GQ983601   | AF446915   | GQ983569   |            |  |
| Dipsacales   | Caprifoliaceae<br>(Morinaceae)    | <i>Zabelia tyaihyoni</i>         | GQ983786   | GQ983627   | GQ983641   |            |            |  |
| Dipsacales   | Caprifoliaceae<br>(Dipsacaceae)   | <i>Triplostegia glandulifera</i> | AF446949   | GQ983612   | AF446919   | GQ983577   | GQ983593   |  |
| Dipsacales   | Caprifoliaceae<br>(Dipsacaceae)   | <i>Scabiosa columbaria</i>       | AF446948.1 | GQ983595   | AF446918.1 |            |            |  |
| Dipsacales   | Caprifoliaceae<br>(Dipsacaceae)   | <i>Scabiosa sp.</i>              |            | AJ236207.1 |            | AJ236006.1 | AF479198.1 |  |
| Dipsacales   | Caprifoliaceae<br>(Dipsacaceae)   | <i>Pterocephalus hookeri</i>     | AF446946   | GQ983623   | AF446916   |            |            |  |
| Dipsacales   | Caprifoliaceae<br>(Dipsacaceae)   | <i>Dipsacus sativus</i>          | L13864.1   | AF209577.1 | 22795882   |            | AF479231.1 |  |
| Dipsacales   | Caprifoliaceae<br>(Dipsacaceae)   | <i>Dipsacus mitis</i>            |            |            | AF446917.1 |            |            |  |
| Dipsacales   | Caprifoliaceae<br>(Dipsacaceae)   | <i>Dipsacus sp.</i>              |            |            |            | U43150.1   |            |  |
| Dipsacales   | Caprifoliaceae<br>(Valerianaceae) | <i>Patrinia triloba</i>          | AF446951   | GQ983625   | AF446921   | GQ983572   |            |  |
| Dipsacales   | Caprifoliaceae<br>(Valerianaceae) | <i>Nardostachys chinensis</i>    | GQ436316   |            |            |            |            |  |
| Dipsacales   | Caprifoliaceae<br>(Valerianaceae) | <i>Valeriana jatamansi</i>       |            | GQ983614   |            |            |            |  |
| Dipsacales   | Caprifoliaceae<br>(Valerianaceae) | <i>Nardostachys grandiflora</i>  |            |            | GU188967   |            |            |  |
| Dipsacales   | Caprifoliaceae<br>(Valerianaceae) | <i>Valerianella locusta</i>      | AF446954   | GQ983622   | DQ354186   |            |            |  |
| Dipsacales   | Caprifoliaceae<br>(Valerianaceae) | <i>Centranthus ruber</i>         | 18873584   | GQ983626   | 20530909   |            |            |  |
| Dipsacales   | Caprifoliaceae<br>(Valerianaceae) | <i>Valeriana officinalis</i>     | L13934.1   | AJ235637.2 |            | AJ236003.1 | AF479199.1 |  |
| Dipsacales   | Caprifoliaceae<br>(Valerianaceae) | <i>Valeriana hirtella</i>        |            |            | AJ429396.1 |            |            |  |
| Saxifragales | Peridiscaceae                     | <i>Soyauxia talbotii</i>         | AM111356   | AM111357   |            | AM111355   | DQ400572   |  |
| Saxifragales | Peridiscaceae                     | <i>Soyauxia sp.</i>              |            |            | DQ241372   |            |            |  |
| Saxifragales | Peridiscaceae                     | <i>Peridiscus lucidus</i>        | AY380356   | AY788274   | DQ411570   | AY674625   | DQ400571   |  |
| Saxifragales | Paeoniaceae                       | <i>Paeonia californica</i>       | AF274593.1 | AF274683.1 | AF033589.1 | AF274603.1 | AF274658.1 |  |
| Saxifragales | Altingiaceae                      | <i>Liquidambar styraciflua</i>   | AF119181.1 | AF092104.1 | AF133219.1 | U42553.1   | AF479217.1 |  |
| Saxifragales | Altingiaceae                      | <i>Altingia excelsa</i>          | AF206732.1 | AF092103.1 | AF304520.1 |            | AF479208.1 |  |
| Saxifragales | Altingiaceae                      | <i>Altingia sp.</i>              |            |            |            | U42552.1   |            |  |
| Saxifragales | Daphniphyllaceae                  | <i>Daphniphyllum sp.</i>         | L01900.2   | AF092118.1 | AF274612.1 | U42531.1   | AF479215.1 |  |
| Saxifragales | Cercidiphyllaceae                 | <i>Cercidiphyllum japonicum</i>  | L11673.1   | AF092112.1 | AM396508.  | AF094534.1 | AF274639.1 |  |
| Saxifragales | Hamamelidaceae                    | <i>Rhodoleia henryi</i>          | AF081072.1 |            |            |            |            |  |
| Saxifragales | Hamamelidaceae                    | <i>Rhodoleia championii</i>      |            | AF274674.1 | AF128833.1 | AF274599.1 | AF274664.1 |  |
| Saxifragales | Hamamelidaceae                    | <i>Exbucklandia populnea</i>     | AF081071.1 | AF093379.1 | AF128831.1 | AF094550.1 | AF274647.1 |  |
| Saxifragales | Hamamelidaceae                    | <i>Disanthus cercidifolius</i>   | AF081069.1 | AF093378.1 | AF128826.1 | AF094549.1 | AF274645.1 |  |
| Saxifragales | Hamamelidaceae                    | <i>Hamamelis mollis</i>          | L01922.2   |            |            |            |            |  |
| Saxifragales | Hamamelidaceae                    | <i>Hamamelis helix</i>           |            | AF092105.1 |            |            |            |  |
| Saxifragales | Hamamelidaceae                    | <i>Hamamelis virginiana</i>      |            |            | AF013046.1 | AF094551.1 | AF036495.1 |  |

|              |                  |                                  |            |            |                        |            |            |
|--------------|------------------|----------------------------------|------------|------------|------------------------|------------|------------|
| Saxifragales | Hamamelidaceae   | <i>Corylopsis pauciflora</i>     | AF060710.1 | AF093377.1 |                        | AF094548.1 |            |
| Saxifragales | Hamamelidaceae   | <i>Corylopsis sinensis</i>       |            |            | AF013038.1             |            | AF274642.1 |
| Saxifragales | Pterostemonaceae | <i>Pterostemon rotundifolius</i> | L11203.2   | AJ235573.2 | AF274630.1             | U42547.1   | AF274663.1 |
| Saxifragales | Iteaceae         | <i>Itea virginica</i>            | 13539648   |            | 149798891              | U42545.1   | 19919657   |
| Saxifragales | Iteaceae         | <i>Itea ilicifolia</i>           |            | 6017805    |                        |            |            |
| Saxifragales | Iteaceae         | <i>Choristylis rhamnoides</i>    | 4586133    | 9799477    | 9864090                | 9502207    | 9799438    |
| Saxifragales | Grossulariaceae  | <i>Ribes aureum</i>              | L11204.2   | AF528859.1 | L34153.1               | L28143.1   | AF274665.1 |
| Saxifragales | Saxifragaceae    | <i>Saxifraga cernua</i>          | 459082     |            | 845665                 |            |            |
| Saxifragales | Saxifragaceae    | <i>Saxifraga retusa</i>          |            | 8452772    |                        |            |            |
| Saxifragales | Saxifragaceae    | <i>Saxifraga mertensiana</i>     |            |            |                        | 1777719    |            |
| Saxifragales | Saxifragaceae    | <i>Saxifraga integrifolia</i>    |            |            |                        |            | 9799464    |
| Saxifragales | Saxifragaceae    | <i>Sullivantia oregana</i>       | U06219.1   | AF209682.1 | L34113.1               | U42812.1   | AF479212.1 |
| Saxifragales | Saxifragaceae    | <i>Heuchera micrantha</i>        | L01925.2   |            |                        | L28139.1   | AF479211.1 |
| Saxifragales | Saxifragaceae    | <i>Heuchera sanguinea</i>        |            | EU002163.1 | 157689191              |            |            |
| Saxifragales | Saxifragaceae    | <i>Heuchera hirsutissima</i>     |            |            | L34125.1               |            |            |
| Saxifragales | Crassulaceae     | <i>Crassula marnierana</i>       | L01899.1   | AJ235447.2 | AF115600.1             | U42525.1   | AF479210.1 |
| Saxifragales | Crassulaceae     | <i>Kalanchoe daigremontiana</i>  | 7240298    | 8439429    |                        | 1777669    | 9799449    |
| Saxifragales | Crassulaceae     | <i>Kalanchoe zimbabwensis</i>    |            |            |                        | 13568519   |            |
| Saxifragales | Crassulaceae     | <i>Sedum rubrotinctum</i>        | L01956.2   |            |                        | U42528.1   |            |
| Saxifragales | Crassulaceae     | <i>Sedum nudum</i>               |            | AJ235600.2 |                        |            | AF274667.1 |
| Saxifragales | Crassulaceae     | <i>Sedum aizoon</i>              |            |            | AB038187.1             |            |            |
| Saxifragales | Crassulaceae     | <i>Dudleya viscida</i>           | L11182.2   | AJ235461.2 | AF274614.1             | U42526.1   | AF274646.1 |
| Saxifragales | Aphanopetalaceae | <i>Aphanopetalum resinosum</i>   | AF274596.1 | AF274675.1 | AF274607.1, EF179066.1 | AF274600.1 | AF274637.1 |
| Saxifragales | Tetracarpaeaceae | <i>Tetracarpaea tasmanica</i>    | L11207.2   | AF209688.1 | L34154.1               | U42549.1   | AF274669.1 |
| Saxifragales | Penthoraceae     | <i>Penthorum sedoides</i>        | L11197.2   | AJ235555.2 | AF274628.1, 148470644  | U42825.1   | AF274661.1 |
| Saxifragales | Haloragaceae     | <i>Myriophyllum exalbescens</i>  | 7240338    | 8452699    |                        | 1777686    | 9799453    |
| Saxifragales | Haloragaceae     | <i>Myriophyllum drummondii</i>   |            |            |                        | 148470523  |            |
| Saxifragales | Haloragaceae     | <i>Haloragis serra</i>           | U26325.2   |            |                        |            |            |
| Saxifragales | Haloragaceae     | <i>Haloragis aspera</i>          |            | AJ235488.2 | AF274616.1             |            |            |
| Saxifragales | Haloragaceae     | <i>Haloragis glauca</i>          |            |            | 148470559              |            |            |
| Saxifragales | Haloragaceae     | <i>Haloragis erecta</i>          |            |            |                        | AF094547.1 | AF274648.1 |
| Vitales      | Vitaceae         | <i>Leea guineensis</i>           | AJ235783.1 | AJ235520.2 | AF274621.1             | AF206951.1 | AF274653.1 |
| Vitales      | Vitaceae         | <i>Vitis aestivalis</i>          | L01960.2   |            | AF274635               |            | AF479207.1 |
| Vitales      | Vitaceae         | <i>Vitis vinifera</i>            |            | DQ424856.1 | DQ424856.1             |            |            |
| Vitales      | Vitaceae         | <i>Vitis sp.</i>                 |            |            |                        | AF207053.1 |            |
| Geraniales   | Geraniaceae      | <i>Pelargonium cotyledonis</i>   | L14703     | AF035911   | EU922531               | AF206982   |            |
| Geraniales   | Geraniaceae      | <i>Geranium tuberosum</i>        | DQ452887   |            |                        |            |            |
| Geraniales   | Geraniaceae      | <i>Geranium sanguineum</i>       |            | AF035906   |                        |            | AF479129   |
| Geraniales   | Geraniaceae      | <i>Geranium palmatum</i>         |            |            | EU922315               |            |            |
| Geraniales   | Geraniaceae      | <i>Geranium sp.</i>              |            |            |                        | U42541     |            |
| Geraniales   | Vivianiaceae     | <i>Viviania marifolia</i>        | L14707.2   | AF209696.1 |                        | AF207054.1 | AF479130.1 |
| Geraniales   | Melianthaceae    | <i>Melianthus major</i>          | 125991586  | 8439469    |                        |            |            |
| Geraniales   | Melianthaceae    | <i>Melianthus comosus</i>        |            |            |                        | 157689199  |            |

|                 |                  |                                |                    |             |                       |            |            |
|-----------------|------------------|--------------------------------|--------------------|-------------|-----------------------|------------|------------|
| Geraniales      | Greyiaceae       | <i>Greyia radlkoferi</i>       | L11185.2           | AF209594.1  | AF542592.1            | U43151.1   | AF479227.1 |
| Myrtales        | Combretaceae     | <i>Terminalia catappa</i>      | U26338             | AF209686    | GU135057              | AF207037   |            |
| Myrtales        | Combretaceae     | <i>Terminalia boivinii</i>     |                    |             |                       |            | AF479147   |
| Myrtales        | Lythraceae       | <i>Lythrum hyssopyfolia</i>    | L10218.1           |             | HM850986.1            |            |            |
| Myrtales        | Lythraceae       | <i>Lythrum salicaria</i>       |                    | AF209621.1  |                       | AF206955.1 | AF479240.1 |
| Myrtales        | Lythraceae       | <i>Lythrum flagellare</i>      |                    |             | 157689197             |            |            |
| Myrtales        | Onagraceae       | <i>Fuchsia procumbens</i>      | AM235668           | AJ235477    | AJ581440              | AM235543   | AM235615   |
| Myrtales        | Onagraceae       | <i>Oenothera speciosa</i>      | 255755669          |             |                       | 472042     |            |
| Myrtales        | Onagraceae       | <i>Oenothera parviflora</i>    |                    | NC_010362.1 | 10362.1               |            |            |
| Myrtales        | Onagraceae       | <i>Oenothera macrocarpa</i>    |                    |             |                       |            | 133918150  |
| Myrtales        | Onagraceae       | <i>Clarkia xantiana</i>        | L01896             | AF209564    |                       | U67930     | AF479148   |
| Myrtales        | Penaeaceae       | <i>Olinia cymosa</i>           | 7240565            |             |                       |            |            |
| Myrtales        | Penaeaceae       | <i>Olinia emarginata</i>       |                    | GQ497640.1  |                       |            |            |
| Myrtales        | Penaeaceae       | <i>Olinia ventosa</i>          |                    |             | 28569321              | 133918022  | 133918094  |
| Myrtales        | Crypteroniaceae  | <i>Crypteronia paniculata</i>  | AF215545, 24899637 |             | AY151566              | AM235482   | EU002152   |
| Myrtales        | Melastomataceae  | <i>Mouriri cyphocarpa</i>      | U26327             | AF209634    |                       |            | AF206965   |
| Myrtales        | Melastomataceae  | <i>Mouriri myrtilloides</i>    |                    |             | JQ588330.1            |            |            |
| Myrtales        | Melastomataceae  | <i>Clidemia rubra</i>          | AF215535           |             |                       |            |            |
| Myrtales        | Melastomataceae  | <i>Clidemia petiolaris</i>     |                    | AJ235439    |                       | AM235516   | AM235588   |
| Myrtales        | Melastomataceae  | <i>Clidemia septuplinervia</i> |                    |             | GQ981968              |            |            |
| Myrtales        | Melastomataceae  | <i>Clidemia dentata</i>        |                    |             | 157689177             |            |            |
| Myrtales        | Vochysiaceae     | <i>Qualea sp.</i>              | 433100             | 14718196    |                       | 7595522    |            |
| Myrtales        | Vochysiaceae     | <i>Qualea grandiflora</i>      |                    |             | 17226036              |            |            |
| Myrtales        | Vochysiaceae     | <i>Vochysia hondurensis</i>    | U26340.2           |             | AY572446.1            |            |            |
| Myrtales        | Vochysiaceae     | <i>Vochysia rufescens</i>      |                    | AJ235644.2  |                       |            |            |
| Myrtales        | Vochysiaceae     | <i>Vochysia tucanorum</i>      |                    |             |                       | AM235540.1 | AM235612.1 |
| Myrtales        | Myrtaceae        | <i>Heteropyxis natalensis</i>  | U26326             | AF209597    | AF368208              | AF206927   | AM235609   |
| Myrtales        | Myrtaceae        | <i>Metrosideros nervulosa</i>  | AJ235785           | AJ235535    |                       |            |            |
| Myrtales        | Myrtaceae        | <i>Metrosideros diffusa</i>    |                    |             | AY521542              |            |            |
| Myrtales        | Myrtaceae        | <i>Metrosideros excelsa</i>    |                    |             |                       | AM235534   | AM235606   |
| Myrtales        | Myrtaceae        | <i>Eucalyptus melliodora</i>   | 240253140          |             |                       |            |            |
| Myrtales        | Myrtaceae        | <i>Eucalyptus grandis</i>      |                    | NC_014570.1 |                       |            |            |
| Myrtales        | Myrtaceae        | <i>Eucalyptus curtisii</i>     |                    |             | 41324109              |            |            |
| Myrtales        | Myrtaceae        | <i>Eucalyptus lehmannii</i>    |                    |             |                       | 133918060  | 133918132  |
| Myrtales        | Myrtaceae        | <i>Myrtus communis</i>         | 15530016           | JF268426    | 164606883             |            | 157689142  |
| Crossosomatales | Staphyleaceae    | <i>Staphylea trifolia</i>      | AY646111.1         | AJ235611.2  |                       | AJ235978.1 | AF479133.1 |
| Crossosomatales | Staphyleaceae    | <i>Staphylea colchica</i>      |                    |             | EU002189.1, 157689209 |            |            |
| Crossosomatales | Guamatelaceae    | <i>Guamatela tuerckheimii</i>  | DQ443463.1         | DQ443453.1  | DQ443460.1            |            |            |
| Crossosomatales | Stachyuraceae    | <i>Stachyurus praecox</i>      | 7414637            | 8452777     |                       | AF207025.1 |            |
| Crossosomatales | Stachyuraceae    | <i>Stachyurus chinensis</i>    |                    |             | 121491005             |            |            |
| Crossosomatales | Crossosomataceae | <i>Crossoma bigelovii</i>      | AY101844.1         |             | DQ443456.1            | AF193942.1 |            |

|                 |                   |                                  |            |            |                     |            |            |            |
|-----------------|-------------------|----------------------------------|------------|------------|---------------------|------------|------------|------------|
| Crossosomatales | Crossosomataceae  | <i>Crossoma californicum</i>     |            | AF209571.1 |                     |            |            | AF479131.1 |
| Crossosomatales | Aphloiaceae       | <i>Aphloia theiformis</i>        | AF206735   | AF209528.1 | HQ680692.1          | AF206851   |            | AF479132   |
| Crossosomatales | Geissolomataceae  | <i>Geissoloma marginatum</i>     | X83990.1   | HQ680710.1 | HQ680697.1          |            |            | AF222378.1 |
| Crossosomatales | Ixerbaceae        | <i>Ixerba brexioides</i>         | 4530131    | 14718088   | 157689193           | 4530133    |            |            |
| Crossosomatales | Strasburgeriaceae | <i>Strasburgeria robusta</i>     | AJ403007   | AF502597   | HQ680701.1          | AF502596   |            |            |
| Picramniales    | Picramniaceae     | <i>Picramnia polyantha</i>       | AF127025   |            |                     |            |            |            |
| Picramniales    | Picramniaceae     | <i>Picramnia pentandra</i>       |            | AJ235559   |                     |            |            |            |
| Sapindales      | Biebersteiniaceae | <i>Biebersteinia orphanidis</i>  | AF035920   | AF035921   |                     |            | GQ497568.1 |            |
| Sapindales      | Nitrariaceae      | <i>Nitraria sphaerocarpa</i>     | 88174765   |            |                     |            |            |            |
| Sapindales      | Nitrariaceae      | <i>Nitraria retusa</i>           |            | GQ497651.1 | 157689201           |            |            | 157689143  |
| Sapindales      | Nitrariaceae      | <i>Nitraria praevisa</i>         |            |            |                     |            | GQ497579.1 |            |
| Sapindales      | Burseraceae       | <i>Bursera inaguensis</i>        | L01890     | AF035899   |                     |            | AF206877   | AY177421   |
| Sapindales      | Burseraceae       | <i>Bursera fagaroides</i>        |            |            | AY594462.1          |            |            |            |
| Sapindales      | Anacardiaceae     | <i>Schinus molle</i>             | 7261037    | 4063563    | 195540515           | 7595535    |            |            |
| Sapindales      | Anacardiaceae     | <i>Rhus copallina</i>            | U00440     | AF035912   |                     |            |            |            |
| Sapindales      | Anacardiaceae     | <i>Rhus transvaalensis</i>       |            |            | EU214283            |            |            |            |
| Sapindales      | Anacardiaceae     | <i>Rhus typhina</i>              |            |            |                     |            | GU476470   |            |
| Sapindales      | Sapindaceae       | <i>Cupaniopsis anacardioides</i> | L13182.2   | AF035903.1 | AY724283.1          | AF206896.1 |            | AF479139.1 |
| Sapindales      | Sapindaceae       | <i>Aesculus pavia</i>            | U39277.2   | AF035894.1 |                     |            | AF206838.1 | AF479138.1 |
| Sapindales      | Sapindaceae       | <i>Aesculus glabra</i>           |            |            | AY968671.1          |            |            |            |
| Sapindales      | Meliaceae         | <i>Trichilia emetica</i>         | U39082.2   | AJ235629.2 | AY128202.1          | AF207045.1 |            | AY128171.1 |
| Sapindales      | Meliaceae         | <i>Swietenia macrophylla</i>     | U39080.2   | AJ235616.2 | AY128200.1          | AF207031.1 |            | AF479241.1 |
| Sapindales      | Rutaceae          | <i>Citrus paradisi</i>           | AJ238407.1 | AJ238408.1 |                     |            |            |            |
| Sapindales      | Rutaceae          | <i>Citrus trifoliata</i>         |            |            | HM163960.1          |            |            |            |
| Sapindales      | Rutaceae          | <i>Citrus aurantium</i>          |            |            |                     |            | U38312.1   | AY177420.1 |
| Sapindales      | Simaroubaceae     | <i>Ailanthus altissima</i>       | U02726     | AF035895   | EF489111            | AF206842   |            |            |
| Huerteales      | Gerrardiaceae     | <i>Gerrardina foliosa</i>        | AY757086.1 | AY757085.1 | FM179924.1          |            |            |            |
| Huerteales      | Tapisciaceae      | <i>Tapiscia sinensis</i>         | AF206825   | AF209685   | EU002190, 195540518 | AF207034   |            | AF479146   |
| Huerteales      | Dipentodontaceae  | <i>Dipentodon sinicus</i>        | 27448213   |            | 22795884            | 27462221   |            |            |
| Huerteales      | Dipentodontaceae  | <i>Perrattetia ovata</i>         | AY935737   | AY935842   | AY935916            | AY929358   |            | AY935806   |
| Malvales        | Neuradaceae       | <i>Neurada procumbens</i>        | U06814     | AF209637   |                     | AF206970   |            | AF479225   |
| Malvales        | Bixaceae          | <i>Bixa orellana</i>             | 2502007    | 4063529    | 195540524           | 7595388    |            | 19919670   |
| Malvales        | Cistaceae         | <i>Helianthemum kahiricum</i>    | 226358319  |            |                     |            |            |            |
| Malvales        | Cistaceae         | <i>Helianthemum grandiflorum</i> |            | 4063549    |                     | 7595446    |            |            |
| Malvales        | Cistaceae         | <i>Helianthemum scopulicola</i>  |            |            | 71668271            |            |            |            |
| Malvales        | Dipterocarpaceae  | <i>Anisoptera marginata</i>      | Y15144     | AF035918   | AJ581409            | AF206849   |            |            |
| Malvales        | Thymelaeaceae     | <i>Thymelaea hirsuta</i>         | Y15151     | AJ235626   | EU002191            | AF207041   |            | AF479234   |
| Malvales        | Malvaceae         | <i>Ochroma pyramidale</i>        | AF206800.1 | AF035910.1 | AY321172.1          | AF206975.1 |            | AF479135.1 |
| Malvales        | Malvaceae         | <i>Bombax buonopozense</i>       | AF022118.1 |            | AY321171.1          |            |            |            |
| Malvales        | Malvaceae         | <i>Bombax ceiba</i>              |            | AJ233051.1 |                     | U42507.1   |            | AF479134.1 |
| Malvales        | Malvaceae         | <i>Durio zibethinus</i>          | AF206764.1 | AF209580.1 | AB289826.1          | AF206905.1 |            | AF479136.1 |
| Malvales        | Malvaceae         | <i>Gossypium hirsutum</i>        | 11562      | 4995178    |                     | 1777727    |            |            |

|               |                    |                                  |            |                     |                      |            |            |            |
|---------------|--------------------|----------------------------------|------------|---------------------|----------------------|------------|------------|------------|
| Malvales      | Malvaceae          | <i>Gossypium longicalyx</i>      |            |                     | 15187153             |            |            |            |
| Malvales      | Malvaceae          | <i>Sterculia lanceolata</i>      | AY082362.1 |                     |                      |            |            |            |
| Malvales      | Malvaceae          | <i>Sterculia apetala</i>         |            | AJ233089.1          |                      |            |            | AF479137.1 |
| Malvales      | Malvaceae          | <i>Sterculia tragacantha</i>     |            |                     | AY321178.1           |            |            |            |
| Malvales      | Malvaceae          | <i>Sterculia recordiana</i>      |            |                     |                      |            | AF207029.1 |            |
| Brassicales   | Tropaeolaceae      | <i>Tropaeolum tricolor</i>       | AF254059.1 | AF035917.1          |                      |            |            | AF479144.1 |
| Brassicales   | Tropaeolaceae      | <i>Tropaeolum majus</i>          |            |                     | AY483224.1           | L28750.1   |            |            |
| Brassicales   | Caricaceae         | <i>Carica papaya</i>             | M95671.1   | AF035901.1          | AY042564.1, 45775521 | U42514.1   |            | AF479145.1 |
| Brassicales   | Limnanthaceae      | <i>Floerkea proserpinacoides</i> | L12679.2   | AF035904.1          | EU002178.1           | U42784.1   |            | AF479143.1 |
| Brassicales   | Koeberliniaceae    | <i>Koeberlinia spinosa</i>       | L14600     | AF209612            | AY483222             | U42512     |            |            |
| Brassicales   | Bataceae           | <i>Batis maritima</i>            | M88341     | AF209538            | AY483219             | U42504     |            |            |
| Brassicales   | Resedaceae         | <i>Reseda alba</i>               | 7240435    | 14718202            |                      | 3265097    |            |            |
| Brassicales   | Resedaceae         | <i>Reseda lutea</i>              |            |                     | 195540527            |            |            |            |
| Brassicales   | Gyrostemonaceae    | <i>Gyrostemon thesioides</i>     | FJ212210   |                     |                      |            |            |            |
| Brassicales   | Gyrostemonaceae    | <i>Gyrostemon racemigerus</i>    |            | GQ497646.1          |                      |            |            |            |
| Brassicales   | Gyrostemonaceae    | <i>Gyrostemon tepperi</i>        |            |                     | AY483237             | AF070971   |            |            |
| Brassicales   | Tovariaceae        | <i>Tovaria pendula</i>           | FJ212209.1 |                     | AY483242.1           |            |            |            |
| Brassicales   | Pentadiplandraceae | <i>Pentadiplandra brazzeana</i>  | U38533.1   |                     | AY483239.1           | AF070972.1 |            |            |
| Brassicales   | Capparaceae        | <i>Capparis spinosa</i>          | AY167985   | AF035900            | EU371772             | EU090942   |            |            |
| Brassicales   | Capparaceae        | <i>Capparis sandwichiana</i>     |            |                     |                      |            |            | AF479140   |
| Brassicales   | Brassicaceae       | <i>Arabidopsis thaliana</i>      | U91966.1   | AJ971660, NC_000932 | AF144348             | X16077     |            | X52320.1   |
| Brassicales   | Brassicaceae       | <i>Raphanus sativus</i>          | GQ184382   | AJ277564            | GQ248193             |            |            | AY366932   |
| Brassicales   | Brassicaceae       | <i>Brassica napus</i>            | AF267640   | AF267641            | AB354273             |            |            |            |
| Brassicales   | Brassicaceae       | <i>Brassica oleracea</i>         |            |                     |                      | AF513990   |            |            |
| Brassicales   | Brassicaceae       | <i>Brassica rapa</i>             |            |                     |                      |            |            | EF470522   |
| Zygophyllales | Krameriaceae       | <i>Krameria ixine</i>            | EU644679   | AJ235514            | EU604050             | AF206948   |            | AF479116   |
| Zygophyllales | Zygophyllaceae     | <i>Guaiaacum guatemalense</i>    | 2467134    |                     |                      |            |            |            |
| Zygophyllales | Zygophyllaceae     | <i>Guaiaacum sanctum</i>         |            | 8452659             |                      | AY674599   |            |            |
| Zygophyllales | Zygophyllaceae     | <i>Guaiaacum officinale</i>      |            |                     | 89242613             |            |            |            |
| Zygophyllales | Zygophyllaceae     | <i>Larrea tridentata</i>         | AF200474   | AY935860            | AY935935             | AY929372   |            | AY935818   |
| Fabales       | Quillajaceae       | <i>Quillaja saponaria</i>        | U06822     | GQ497659.1          | AY386843             |            |            |            |
| Fabales       | Polygalaceae       | <i>Polygala cruciata</i>         | L01945.2   | AJ235568.1          |                      |            |            | AF479233.1 |
| Fabales       | Polygalaceae       | <i>Polygala californica</i>      |            |                     | AY386842.1           |            |            |            |
| Fabales       | Polygalaceae       | <i>Polygala pauciflora</i>       |            |                     |                      | U42797.1   |            |            |
| Fabales       | Surianaceae        | <i>Stylobasium spathulatum</i>   | U06828     | AF209681            | EU604032             | AF207030   |            |            |
| Fabales       | Fabaceae           | <i>Schotia afra</i>              | AM235016   |                     |                      |            |            |            |
| Fabales       | Fabaceae           | <i>Schotia brachypetala</i>      |            |                     | EU362038             | X66779     |            | X66764     |
| Fabales       | Fabaceae           | <i>Cercis canadensis</i>         | U74188     | DQ401328            | EU361912             |            |            |            |
| Fabales       | Fabaceae           | <i>Bauhinia galpinii</i>         | AM234262   |                     | EU361875             | X66777     |            | X66755     |
| Fabales       | Fabaceae           | <i>Bauhinia sp.</i>              |            | AF209540            |                      |            |            |            |
| Fabales       | Fabaceae           | <i>Ceratonia siliqua</i>         | U74203     |                     | EU361911             | X66778     |            | X66758     |
| Fabales       | Fabaceae           | <i>Albizia julibrissin</i>       | Z70147     | AF209524            | AY386855             | GU476373   |            | X66754     |
| Fabales       | Fabaceae           | <i>Acacia cavenia</i>            | Z70145     |                     |                      |            |            |            |
| Fabales       | Fabaceae           | <i>Acacia pulchella</i>          |            | EU811863            |                      |            |            |            |

|         |              |                                |                    |             |            |            |            |            |
|---------|--------------|--------------------------------|--------------------|-------------|------------|------------|------------|------------|
| Fabales | Fabaceae     | <i>Acacia anegadensis</i>      |                    |             | HM020706   |            |            |            |
| Fabales | Fabaceae     | <i>Acacia fimbriata</i>        |                    |             |            | X66780     | X66753     |            |
| Fabales | Fabaceae     | <i>Mimosa spegazzinii</i>      | Z70151             |             |            | X66686     | X66762     |            |
| Fabales | Fabaceae     | <i>Mimosa tenuiflora</i>       |                    | EU811854    |            |            |            |            |
| Fabales | Fabaceae     | <i>Mimosa pudica</i>           |                    |             | AY177668   |            |            |            |
| Fabales | Fabaceae     | <i>Indigofera australis</i>    | AF308711           |             |            |            |            |            |
| Fabales | Fabaceae     | <i>Indigofera sokotrana</i>    |                    |             | GU951671   |            |            |            |
| Fabales | Fabaceae     | <i>Indigofera gerardiana</i>   |                    |             |            | X66689     | X66760     |            |
| Fabales | Fabaceae     | <i>Glycine max</i>             | EU717256           | AY935856    | AF142700   | X02623     | X66759     |            |
| Fabales | Fabaceae     | <i>Erythrina cristagalli</i>   | Z70170             |             | AY386869   | AF525296   |            |            |
| Fabales | Fabaceae     | <i>Erythrina sousae</i>        |                    | EU717512    |            |            |            |            |
| Fabales | Fabaceae     | <i>Lotus corniculatus</i>      | U74213             |             | HM049505   | 50880779   |            |            |
| Fabales | Fabaceae     | <i>Lotus japonicus</i>         |                    | AP002983    |            |            |            |            |
| Fabales | Fabaceae     | <i>Pisum sativum</i>           | 255957401          | 12147       | 52789062   | U43011     |            |            |
| Fabales | Fabaceae     | <i>Cicer arietinum</i>         | 18032750           | NC_011163.1 |            | 32968200   |            |            |
| Fabales | Fabaceae     | <i>Cicer cuneatum</i>          |                    |             | 125860457  |            |            |            |
| Fabales | Fabaceae     | <i>Astragalus membranaceus</i> | EF685978           |             | EF685992   | AF359594   |            |            |
| Rosales | Rosaceae     | <i>Spiraea vanhouttei</i>      | L11206.2           |             |            | U42801.1   |            |            |
| Rosales | Rosaceae     | <i>Spiraea betulifolia</i>     |                    | AJ235608.2  |            |            |            | AF479103.1 |
| Rosales | Rosaceae     | <i>Spiraea cantoniensis</i>    |                    |             | AF288127.1 |            |            |            |
| Rosales | Rosaceae     | <i>Prunus persica</i>          | AF206813.1         | AF209660.1  | AF288117.1 | L28749.1   | AY935820.1 |            |
| Rosales | Rosaceae     | <i>Photinia fraseri</i>        | L11200.2           | AF209653.1  |            | U42800.1   | AF479101.1 |            |
| Rosales | Rosaceae     | <i>Photinia serrulata</i>      |                    |             | AF288111.1 |            |            |            |
| Rosales | Barbeyaceae  | <i>Barbeya oleoides</i>        | U60314.1           | AF209535.1  | JF317418.1 | JF317358.1 | JF317379.1 |            |
| Rosales | Elaeagnaceae | <i>Elaeagnus angustifolia</i>  | U17038.1           |             |            |            |            |            |
| Rosales | Elaeagnaceae | <i>Elaeagnus sp.</i>           |                    | AJ235462.2  |            |            |            |            |
| Rosales | Elaeagnaceae | <i>Elaeagnus umbellata</i>     |                    |             | AY257529.1 | L24090.1   |            |            |
| Rosales | Elaeagnaceae | <i>Elaeagnus bockii</i>        |                    |             |            |            |            | JF317385.1 |
| Rosales | Dirachmaceae | <i>Dirachma socotrana</i>      | AJ225789.1         |             | JF317423.1 | JF317364.1 | JF317383.1 |            |
| Rosales | Rhamnaceae   | <i>Rhamnus lycioides</i>       | 9968785            |             |            |            |            |            |
| Rosales | Rhamnaceae   | <i>Rhamnus catharticus</i>     |                    | 8452734     |            |            |            |            |
| Rosales | Rhamnaceae   | <i>Rhamnus cathartica</i>      |                    |             | 30421077   | 6689072    |            |            |
| Rosales | Rhamnaceae   | <i>Rhamnus utilis</i>          |                    |             |            |            |            | JF317393.1 |
| Rosales | Rhamnaceae   | <i>Ceanothus sanguineus</i>    | U06795.1           | AF209558.1  |            | U42799.1   | AF479102.1 |            |
| Rosales | Rhamnaceae   | <i>Ceanothus pumilus</i>       |                    |             | AF049841.1 |            |            |            |
| Rosales | Ulmaceae     | <i>Zelkova serrata</i>         | D86317.1, AF206835 | AF209699.1  |            | U42819.1   | AF479099.1 |            |
| Rosales | Ulmaceae     | <i>Zelkova schneideriana</i>   |                    |             | AF345328.1 |            |            |            |
| Rosales | Cannabaceae  | <i>Celtis yunnanensis</i>      | L12638.2           |             |            | U42818.1   | AF479098.1 |            |
| Rosales | Cannabaceae  | <i>Celtis philippensis</i>     |                    | AY263961.1  | AY263925.1 |            |            |            |
| Rosales | Cannabaceae  | <i>Cannabis sativa</i>         | 24634979           | JF317400.1  | 16224059   | JF317360.1 | 157689139  |            |
| Rosales | Cannabaceae  | <i>Humulus lupulus</i>         | AF206777.1         | AF209599.1  | AY257528.1 | AF206931.1 | AF223066.1 |            |
| Rosales | Moraceae     | <i>Morus indica</i>            | DQ226511.1         | DQ226511.1  |            |            |            |            |
| Rosales | Moraceae     | <i>Morus alba</i>              |                    |             | AY257531.1 | L24398.1   |            |            |
| Rosales | Moraceae     | <i>Morus nigra</i>             |                    |             |            |            |            | AF479232.1 |
| Rosales | Moraceae     | <i>Ficus benjamina</i>         | AF500350.1         |             |            |            |            |            |
| Rosales | Moraceae     | <i>Ficus sp.</i>               |                    | AF209587.1  |            | AF206911.1 |            |            |
| Rosales | Moraceae     | <i>Ficus carica</i>            |                    |             | AY257530.1 |            |            |            |
| Rosales | Moraceae     | <i>Ficus tikoua</i>            |                    |             |            |            |            | JF317386.1 |

|              |                  |                                        |            |            |            |            |  |            |
|--------------|------------------|----------------------------------------|------------|------------|------------|------------|--|------------|
| Rosales      | Urticaceae       | <i>Pilea depressa</i>                  | AF500359   |            |            |            |  |            |
| Rosales      | Urticaceae       | <i>Pilea cadierei</i>                  |            | AF209654   | JF317431.1 | U42820     |  |            |
| Rosales      | Urticaceae       | <i>Pilea fontana</i>                   |            |            |            |            |  | AY686776   |
| Rosales      | Urticaceae       | <i>Urtica dioica</i>                   | AF500361.1 | 8452793    |            |            |  |            |
| Rosales      | Urticaceae       | <i>Urtica cannabina</i>                |            |            | 195540529  |            |  |            |
| Rosales      | Urticaceae       | <i>Boehmeria nivea</i>                 | AJ235801   |            |            | AF206870   |  | AY686767   |
| Rosales      | Urticaceae       | <i>Boehmeria<br/>platanifolia</i>      |            |            | AF353579   |            |  |            |
| Fagales      | Nothofagaceae    | <i>Nothofagus<br/>antarctica</i>       | AY263939   | AY147106   | AY263924   | AY147111   |  |            |
| Fagales      | Nothofagaceae    | <i>Nothofagus<br/>solandri</i>         |            |            | 4586826    |            |  |            |
| Fagales      | Fagaceae         | <i>Fagus grandifolia</i>               | AY263936.1 | AY147105.1 |            | AF206910.1 |  | AY935813.1 |
| Fagales      | Fagaceae         | <i>Fagus sylvatica</i>                 |            |            | AB046507.1 |            |  |            |
| Fagales      | Fagaceae         | <i>Quercus rubra</i>                   | AB125026.1 | AF132888.1 | AY312058.1 | AF132892.1 |  |            |
| Fagales      | Fagaceae         | <i>Quercus suber</i>                   |            |            |            |            |  | AY428812.1 |
| Fagales      | Fagaceae         | <i>Chrysolepis<br/>sempervirens</i>    | AF061995.1 | AF209563.1 |            | AF206886.1 |  | AF479107.1 |
| Fagales      | Fagaceae         | <i>Chrysolepis<br/>chrysophylla</i>    |            |            | FJ185045.1 |            |  |            |
| Fagales      | Casuarinaceae    | <i>Casuarina</i>                       | 436798     |            |            |            |  |            |
| Fagales      | Casuarinaceae    | <i>Casuarina<br/>cunninghamiana</i>    |            |            |            |            |  |            |
| Fagales      | Casuarinaceae    | <i>Casuarina litorea</i>               |            | 8439266    |            |            |  |            |
| Fagales      | Casuarinaceae    | <i>Casuarina cristata</i>              |            |            | 31788915   |            |  |            |
| Fagales      | Casuarinaceae    | <i>Casuarina<br/>equisetifolia</i>     |            |            |            | U42515     |  |            |
| Fagales      | Betulaceae       | <i>Alnus incana</i>                    | 297535     |            |            |            |  |            |
| Fagales      | Betulaceae       | <i>Alnus sinuata</i>                   |            | 37729409   |            | 32815611   |  |            |
| Fagales      | Betulaceae       | <i>Alnus japonica</i>                  |            |            | 18146885   |            |  |            |
| Fagales      | Betulaceae       | <i>Alnus glutinosa</i>                 |            |            |            |            |  | 19919547   |
| Fagales      | Juglandaceae     | <i>Juglans</i>                         | AY263932.1 | AY263952.1 |            |            |  |            |
| Fagales      | Juglandaceae     | <i>Juglans nigra</i>                   |            |            | AF118036   | AF206943.1 |  | AF479105.1 |
| Fagales      | Myricaceae       | <i>Myrica gale</i>                     | 436805     |            | 31788949   |            |  |            |
| Fagales      | Myricaceae       | <i>Myrica esculenta</i>                |            |            |            | 218217868  |  |            |
| Fagales      | Myricaceae       | <i>Morella cerifera</i>                | AJ626759.1 | AJ235537.1 | AY491657.1 | AF206967.1 |  | AF479247.1 |
| Cucurbitales | Anisophylleaceae | <i>Anisophyllea fallax</i>             | AY935742   | AY935849   | AY935923   | AY929365   |  | AY935807   |
| Cucurbitales | Anisophylleaceae | <i>Anisophyllea<br/>sororia</i>        |            |            | 65332693   |            |  |            |
| Cucurbitales | Corynocarpaceae  | <i>Corynocarpus<br/>laevigatus</i>     | AF148994.1 | AJ235446.2 | AY491652.1 | AF206892.1 |  | AF479110.1 |
| Cucurbitales | Coriariaceae     | <i>Coriaria ruscifolia</i>             | AF148999.1 | AY968430.1 | AB016462.1 | AY968395.1 |  | AY968408.1 |
| Cucurbitales | Coriariaceae     | <i>Coriaria myrtifolia</i>             |            | AF092117.1 | AF542600.2 |            |  |            |
| Cucurbitales | Tetramelaceae    | <i>Tetrameles<br/>nudiflora</i>        | L21943.1   | AF209689.1 | AY968458.1 | U41502.1   |  | AY968422.1 |
| Cucurbitales | Datisceae        | <i>Datisca cannabina</i>               | L21939.1   | AJ235450.2 | AB016467.1 | AF008952.1 |  |            |
| Cucurbitales | Datisceae        | <i>Datisca glomerata</i>               |            |            |            |            |  | AY968411.1 |
| Cucurbitales | Begoniaceae      | <i>Begonia sanguinea</i>               | L01888.2   |            |            |            |  |            |
| Cucurbitales | Begoniaceae      | <i>Begonia<br/>metallicaxsanguinea</i> |            | AF209541.1 |            |            |  | AF479109.1 |
| Cucurbitales | Begoniaceae      | <i>Begonia grandis</i>                 |            |            | AB016466.1 |            |  |            |
| Cucurbitales | Begoniaceae      | <i>Begonia oxyloba</i>                 |            |            | 67772428   |            |  |            |
| Cucurbitales | Begoniaceae      | <i>Begonia luxurians</i>               |            |            |            | AF534762.1 |  |            |
| Cucurbitales | Cucurbitaceae    | <i>Xerosicyos danguyi</i>              | AY973026   | AJ235648   | AY968459   | AY973017   |  | AY968423   |
| Cucurbitales | Cucurbitaceae    | <i>Dendrosicyos<br/>socotranus</i>     | AY973022   | AY968433   | AY973018   | AY968397   |  | AY968412   |
| Cucurbitales | Cucurbitaceae    | <i>Cucurbita pepo</i>                  | 17135916   | 14718023   | 111053130  | GQ856148   |  | AF479108.1 |
| Cucurbitales | Cucurbitaceae    | <i>Cucumis melo</i>                    | DQ535800   |            | DQ536659   |            |  |            |
| Cucurbitales | Cucurbitaceae    | <i>Cucumis sativus</i>                 |            | AF209572   |            |            |  |            |
| Cucurbitales | Cucurbitaceae    | <i>Cucumis anguria</i>                 |            |            |            | 33330857   |  |            |
| Cucurbitales | Cucurbitaceae    | <i>Coccinia sessilifolia</i>           | AY968520   | AY968427   | AY968446   | AY973011   |  | AY968404   |
| Celastrales  | Lepidobotryaceae | <i>Lepidobotrys<br/>staudtii</i>       | AJ402966   | AY935831   | AY935904   | AY929346   |  |            |
| Celastrales  | Lepidobotryaceae | <i>Ruptionocarpon<br/>caracolito</i>   | AJ402997   | AY788275   | 62902955   | AY929361   |  |            |

|             |                                 |                                      |            |            |                         |            |            |            |
|-------------|---------------------------------|--------------------------------------|------------|------------|-------------------------|------------|------------|------------|
| Celastrales | Celastraceae<br>(Parnassiaceae) | <i>Parnassia<br/>fimbriata</i>       | L01939.2   |            |                         |            |            | AF036496.1 |
| Celastrales | Celastraceae<br>(Parnassiaceae) | <i>Parnassia glauca</i>              | AY935729   |            | AY935908                |            |            |            |
| Celastrales | Celastraceae<br>(Parnassiaceae) | <i>Parnassia palustris</i>           |            | AJ235552.2 | AY935910.1              | AY929353.1 |            |            |
| Celastrales | Celastraceae                    | <i>Siphonodon<br/>celastrineus</i>   | AF206821.1 | AF209676.1 | AY935919.1              | AF207021.1 |            |            |
| Celastrales | Celastraceae                    | <i>Siphonodon<br/>australe</i>       | X83996     |            |                         |            |            |            |
| Celastrales | Celastraceae                    | <i>Siphonodon<br/>australis</i>      |            |            |                         |            |            | AF222346.1 |
| Celastrales | Celastraceae                    | <i>Denhamia<br/>celastroides</i>     | AJ402941   | AY788267   |                         |            |            |            |
| Celastrales | Celastraceae                    | <i>Denhamia<br/>pittosporoides</i>   |            |            | EU329001                | EU328772   |            |            |
| Celastrales | Celastraceae                    | <i>Denhamia<br/>viridissima</i>      |            |            |                         |            |            | 164370794  |
| Celastrales | Celastraceae                    | <i>Stackhousia<br/>minima</i>        | AJ235795.1 | AJ235610.2 | EF135596                | AF207026.1 | AF479114.1 |            |
| Celastrales | Celastraceae                    | <i>Stackhousia<br/>monogyna</i>      |            |            | AY935920.1              |            |            |            |
| Celastrales | Celastraceae                    | <i>Paxistima canbyi</i>              | AY788198   | AY788273   |                         | AY674623   | 12082562   |            |
| Celastrales | Celastraceae                    | <i>Paxistima<br/>myrsinites</i>      |            |            | 164652424               |            |            |            |
| Celastrales | Celastraceae                    | <i>Euonymus alatus</i>               | AY788197   |            |                         | X16600     |            |            |
| Celastrales | Celastraceae                    | <i>Euonymus<br/>americanus</i>       |            | EU002160   | EU002170                |            | 157689137  |            |
| Celastrales | Celastraceae                    | <i>Tripterygium<br/>regelii</i>      | AY788193   | AY788260   | 164652380               | AY788161   | 12082560   |            |
| Celastrales | Celastraceae                    | <i>Celastrus scandens</i>            | AY788195   | AY788264   |                         |            | 12082567   |            |
| Celastrales | Celastraceae                    | <i>Celastrus<br/>orbiculatus</i>     |            |            | EF135517                | AY788162   |            |            |
| Celastrales | Celastraceae                    | <i>Maytenus<br/>senegalensis</i>     | AY380353   | AY788272   |                         |            |            |            |
| Celastrales | Celastraceae                    | <i>Maytenus<br/>floribunda</i>       |            |            | EU328961                |            | 164370813  |            |
| Celastrales | Celastraceae                    | <i>Maytenus<br/>arbutifolia</i>      |            |            |                         | AY674616   |            |            |
| Celastrales | Celastraceae                    | <i>Plagiopteron<br/>suaveolens</i>   | 257783293  | AJ235562   | 71891428                | AF206993   | 12082633   |            |
| Celastrales | Celastraceae                    | <i>Elaeodendron<br/>orientale</i>    | AY380347   | AY788269   | EF135531                | AY674593   |            |            |
| Celastrales | Celastraceae                    | <i>Elaeodendron<br/>vitiense</i>     |            |            |                         |            | 81250859   |            |
| Celastrales | Celastraceae                    | <i>Brexia<br/>madagascariensis</i>   | L11176.1   | AJ235419.2 | AY935899.1              | U42543.1   | AF479112.1 |            |
| Oxalidales  | Huaceae                         | <i>Hua gabonii</i>                   | FJ670185   | FJ669995   | FJ670056,<br>62902925   | AY929345   | AY935796   |            |
| Oxalidales  | Huaceae                         | <i>Afrostryrax<br/>lepidophyllus</i> | AY935721   | AY935824   | AY935896                | AY929339   | AY935792   |            |
| Oxalidales  | Connaraceae                     | <i>Rourea minor</i>                  | FJ707537.1 | FJ669994.1 | EF135591.1              | EF135603.1 |            |            |
| Oxalidales  | Connaraceae                     | <i>Connarus<br/>conchocarpus</i>     | U06798.1   |            | 157689179               |            |            |            |
| Oxalidales  | Connaraceae                     | <i>Connarus<br/>championii</i>       |            | AY935852.1 | AY935928.1              | AY929368.1 | AY935810.1 |            |
| Oxalidales  | Oxalidaceae                     | <i>Oxalis dillenii</i>               | L01938.2   | AF209642.1 |                         | AF206978.1 | AF479230.1 |            |
| Oxalidales  | Oxalidaceae                     | <i>Oxalis acetosella</i>             |            | FJ707531   |                         |            |            |            |
| Oxalidales  | Oxalidaceae                     | <i>Oxalis latifolia</i>              |            |            | EU002186.1              |            |            |            |
| Oxalidales  | Oxalidaceae                     | <i>Dapania racemosa</i>              | AY788196   | AY788266   | FJ670049.1              | AY674590   |            |            |
| Oxalidales  | Oxalidaceae                     | <i>Averrhoa<br/>carambola</i>        | L14692.2   | AJ235404.2 | AY935924.1,<br>62902967 | AF206859.1 | AF479127.1 |            |
| Oxalidales  | Brunelliaceae                   | <i>Brunellia<br/>acutangula</i>      | FJ707536   | FJ669993   | EF135512                | FJ669718   |            |            |
| Oxalidales  | Cephalotaceae                   | <i>Cephalotus<br/>follicularis</i>   | L01894     | AY788265   | FJ670045.1              | 1777658    |            |            |



|              |                |                                       |            |            |                      |            |            |
|--------------|----------------|---------------------------------------|------------|------------|----------------------|------------|------------|
| Oxalidales   | Cunoniaceae    | <i>Eucryphia lucida</i>               | L01918     |            | 157689183            | U42533.    | 2687434    |
| Oxalidales   | Cunoniaceae    | <i>Eucryphia milliganii</i>           |            | AJ235470   |                      |            |            |
| Oxalidales   | Cunoniaceae    | <i>Davidsonia pruriens</i>            | AF291934.1 | AF209574.1 | U92846.1             | AF206897.1 | AY935812.1 |
| Oxalidales   | Elaeocarpaceae | <i>Sloanea latifolia</i>              | AF022131.1 |            |                      | U42826.1   |            |
| Oxalidales   | Elaeocarpaceae | <i>Sloanea berteriana</i>             |            | AJ235603.2 |                      |            | AF479126.1 |
| Oxalidales   | Elaeocarpaceae | <i>Sloanea australis</i>              |            |            | AY935938.1           |            |            |
| Oxalidales   | Elaeocarpaceae | <i>Elaeocarpus sphaericus</i>         | 17135933   |            |                      | 7595426    | 27803696   |
| Oxalidales   | Elaeocarpaceae | <i>Elaeocarpus reticulatus</i>        |            | 62902858   | 62902981             |            |            |
| Oxalidales   | Elaeocarpaceae | <i>Crinodendron patagua</i>           | AF291940.1 |            |                      |            | AY935811.1 |
| Oxalidales   | Elaeocarpaceae | <i>Crinodendron hookerianum</i>       |            | AF209570.1 | AY491655.1           | AF206893.1 |            |
| Malpighiales | Humiriaceae    | <i>Sacoglottis sp.</i>                | AB233890   | AB233682   | 118917529            | 119368155  |            |
| Malpighiales | Humiriaceae    | <i>Vantanea guianensis</i>            | Z75679     | AY788261   | EF135600             | AY674639   |            |
| Malpighiales | Humiriaceae    | <i>Humiria balsaminifera</i>          | L01926.2   | AJ235495.2 | EF135549.1           | AF206930.1 | AY935815.1 |
| Malpighiales | Ixonanthaceae  | <i>Ochthocosmus longipedicellatus</i> | 257853507  | 257853485  | EF135573             | AY674621   |            |
| Malpighiales | Irvingiaceae   | <i>Irvingia malayana</i>              | AF206782   | AF209605   | EF135553             | AF206939   |            |
| Malpighiales | Irvingiaceae   | <i>Klainedoxa gabonensis</i>          | AY663630   | AY788232   | EF135556             | AY674610   |            |
| Malpighiales | Clusiaceae     | <i>Symphonia tanalensis</i>           | AB233852.1 | AB233644.1 | AB233748.1           | AB233540.1 |            |
| Malpighiales | Clusiaceae     | <i>Garcinia xanthochymus</i>          | 22003621   |            |                      |            |            |
| Malpighiales | Clusiaceae     | <i>Garcinia subelliptica</i>          |            | 119368193  |                      | 119368140  |            |
| Malpighiales | Clusiaceae     | <i>Garcinia hessii</i>                |            |            | 149213077            |            |            |
| Malpighiales | Clusiaceae     | <i>Clusia gundlachii</i>              | Z75673     | AY788209   | EF135520             | AY674584   |            |
| Malpighiales | Bonnetiaceae   | <i>Archytaea multiflora</i>           | AY380342   | AY788202   |                      | AY674574   |            |
| Malpighiales | Bonnetiaceae   | <i>Archytaea triflora</i>             |            |            | HQ331545.1           |            |            |
| Malpighiales | Bonnetiaceae   | <i>Bonnetia roraimae</i>              | AJ402930   |            |                      |            |            |
| Malpighiales | Bonnetiaceae   | <i>Bonnetia sessilis</i>              |            | 257853479  | EF135509             | FJ707523.1 |            |
| Malpighiales | Calophyllaceae | <i>Mesua sp.</i>                      | AF206794   | AF209627   | EF135567             | AF206962   |            |
| Malpighiales | Calophyllaceae | <i>Calophyllum sp.</i>                | Z75672     |            |                      |            |            |
| Malpighiales | Calophyllaceae | <i>Calophyllum leleanii</i>           |            |            | 47570919             |            |            |
| Malpighiales | Calophyllaceae | <i>Calophyllum soulattri</i>          |            |            |                      | AY674580   |            |
| Malpighiales | Calophyllaceae | <i>Mammea americana</i>               | AY625029   |            | 47570933             |            |            |
| Malpighiales | Calophyllaceae | <i>Mammea siamensis</i>               |            | 257852931  |                      | FJ669689.1 |            |
| Malpighiales | Podostemaceae  | <i>Podostemum ceratophyllum</i>       | U68088     | AY788249   | EF135584             | AY674630   |            |
| Malpighiales | Podostemaceae  | <i>Marathrum rubrum</i>               | U68085     | AF209624   |                      | AF206958   |            |
| Malpighiales | Podostemaceae  | <i>Marathrum cf. oxycarpum</i>        |            | 257852965  |                      |            |            |
| Malpighiales | Podostemaceae  | <i>Marathrum schiedeanum</i>          |            |            | AB038195             |            |            |
| Malpighiales | Hypericaceae   | <i>Vismia baccifera</i>               | 257783267  |            |                      |            |            |
| Malpighiales | Hypericaceae   | <i>Vismia rubescens</i>               |            | FJ669978.1 |                      |            |            |
| Malpighiales | Hypericaceae   | <i>Vismia sp.</i>                     |            |            | EF135601.1           | AY674640.1 |            |
| Malpighiales | Hypericaceae   | <i>Hypericum perforatum</i>           | HQ332081.1 | AF209602.1 | HQ331630.1, DQ168438 | AF206934.1 | AF479122.1 |
| Malpighiales | Hypericaceae   | <i>Eliea articulata</i>               | FJ670167   | FJ669976   | FJ670023             | FJ669698   |            |
| Malpighiales | Hypericaceae   | <i>Cratoxylum cochinchinense</i>      | AB233891.1 | AB233683.1 | HQ331587.1           | AB233579.1 |            |

|              |                 |                                      |            |            |            |  |            |            |
|--------------|-----------------|--------------------------------------|------------|------------|------------|--|------------|------------|
| Malpighiales | Hypericaceae    | <i>Cratoxylum ligustrinum</i>        |            |            | 222079602  |  |            |            |
| Malpighiales | Achariaceae     | <i>Erythrospermum phytolaccoides</i> | AJ418798   | 257852923  | EF135535   |  | FJ669684.1 |            |
| Malpighiales | Achariaceae     | <i>Hydnocarpus heterophylla</i>      | AF206778   | AF209600   |            |  | AF206932   | AF479121   |
| Malpighiales | Achariaceae     | <i>Hydnocarpus sp.</i>               |            |            | EF135551   |  |            |            |
| Malpighiales | Achariaceae     | <i>Pangium edule</i>                 | AF206801   | AF209644   | FJ669998.1 |  | AF206979   |            |
| Malpighiales | Achariaceae     | <i>Kiggelaria africana</i>           | AF206786   |            | EF135555   |  | AF206945   |            |
| Malpighiales | Achariaceae     | <i>Kiggelaria sp.</i>                |            | AY788231   |            |  |            |            |
| Malpighiales | Achariaceae     | <i>Acharia tragodes</i>              | AJ418795   | AF209520   | EF135500   |  | AF206837   |            |
| Malpighiales | Passifloraceae  | <i>Malesherbia linearifolia</i>      | AF206792   | AF209622   | EF135562   |  | AF206957   | DQ123011   |
| Malpighiales | Passifloraceae  | <i>Turnera subulata</i>              | DQ123398   |            |            |  |            | DQ123012   |
| Malpighiales | Passifloraceae  | <i>Turnera ulmifolia</i>             |            | AJ235634   | EF135599   |  | U42817     |            |
| Malpighiales | Passifloraceae  | <i>Paropsia madagascariensis</i>     | AF206802   |            | EF135576   |  | AF206980   |            |
| Malpighiales | Passifloraceae  | <i>Passiflora coccinea</i>           |            | AJ235553   |            |  |            |            |
| Malpighiales | Passifloraceae  | <i>Passiflora biflora</i>            | EU017122   | EU017086   | EU017067   |  |            |            |
| Malpighiales | Passifloraceae  | <i>Passiflora foetida</i>            |            |            |            |  | GU476454   | DQ122966   |
| Malpighiales | Passifloraceae  | <i>Passiflora standleyi</i>          |            |            |            |  | AF206981   |            |
| Malpighiales | Goupiaceae      | <i>Goupia glabra</i>                 | AJ235780   | AJ235485   | EF135544   |  | AF206920   |            |
| Malpighiales | Violaceae       | <i>Rinorea pubiflora</i>             | AY935749   | AY935862   | AY935937   |  | AY929373   | AY935821   |
| Malpighiales | Violaceae       | <i>Rinorea bengalensis</i>           |            |            | 115112372  |  |            |            |
| Malpighiales | Violaceae       | <i>Viola philippica</i>              | AB354436   |            | DQ842600   |  | 195183680  |            |
| Malpighiales | Violaceae       | <i>Viola pubescens</i>               |            | FJ669992   |            |  | FJ669717   | EF564797   |
| Malpighiales | Violaceae       | <i>Hymenanthera alpina</i>           | Z75692     | AJ235499   | EF135552   |  | AF206933   |            |
| Malpighiales | Violaceae       | <i>Hybanthus concolor</i>            | AY757141   |            | EF135550   |  |            |            |
| Malpighiales | Violaceae       | <i>Hybanthus elatus</i>              |            | AB354525   |            |  | AB354525   |            |
| Malpighiales | Violaceae       | <i>Leonia glycycarpa</i>             | 257783287  | AY788234   | EF135558   |  | AY674613   |            |
| Malpighiales | Lacistemataceae | <i>Lozania pittieri</i>              | AJ418804   | 257852955  | FJ670026.1 |  | FJ669702   |            |
| Malpighiales | Lacistemataceae | <i>Lacistema aggregatum</i>          | AF206787.1 | AF209613.1 | AY935933.1 |  | AF206949.1 | AY935816.1 |
| Malpighiales | Salicaceae      | <i>Lunania sp.</i>                   | AY788182   | AY788236   |            |  | AY674615   |            |
| Malpighiales | Salicaceae      | <i>Lunania parviflora</i>            |            |            | EF135561   |  |            |            |
| Malpighiales | Salicaceae      | <i>Casearia sylvestris</i>           | AF206746.1 | AF209557.1 |            |  | AF206882.1 |            |
| Malpighiales | Salicaceae      | <i>Casearia javitensis</i>           |            |            | AY935927.1 |  |            | AY935809.1 |
| Malpighiales | Salicaceae      | <i>Scyphostegia borneensis</i>       | AJ403000   | AY788254   | EF135594   |  | AY674635   |            |
| Malpighiales | Salicaceae      | <i>Poliothyrsis sp.</i>              | AY788186   | AY788251   |            |  | AY674631   |            |
| Malpighiales | Salicaceae      | <i>Poliothyrsis sinensis</i>         |            |            | EF135586   |  |            |            |
| Malpighiales | Salicaceae      | <i>Idesia polycarpa</i>              | AF206781   | AF209604   | 118917619  |  | AB233623   | 19919558   |
| Malpighiales | Salicaceae      | <i>Salix reticulata</i>              | AJ235793   | AJ235590   | EF135592   |  | AF207011   |            |
| Malpighiales | Salicaceae      | <i>Populus tremuloides</i>           | M58392.1   | AF209658.1 |            |  | AF206999.1 | AF479118.1 |
| Malpighiales | Salicaceae      | <i>Populus nigra</i>                 |            |            | AB038186.1 |  |            |            |
| Malpighiales | Salicaceae      | <i>Dovyalis rhamnoides</i>           | Z75677     | AY788217   | EF135529   |  | AY674592   |            |
| Malpighiales | Salicaceae      | <i>Flacourtia indica</i>             | GU135218   | AB233725   | GU135055   |  | AB233621   |            |
| Malpighiales | Salicaceae      | <i>Abatia parviflora</i>             | AF206726   | AF209519   | EF135498   |  | AF206836   |            |
| Malpighiales | Salicaceae      | <i>Prockia sp.</i>                   | AY788187   | AY788252   |            |  | AY674632   |            |
| Malpighiales | Salicaceae      | <i>Prockia crucis</i>                |            |            | EF135588   |  |            |            |
| Malpighiales | Elatinaceae     | <i>Elatine triandra</i>              | AY380349   | AY788219   | EF135532   |  | AY674594   |            |
| Malpighiales | Elatinaceae     | <i>Bergia texana</i>                 | AY380344   |            | EF135506   |  | AY674577   |            |
| Malpighiales | Malpighiaceae   | <i>Byrsonima crassifolia</i>         | L01892     | AY788206   | AF344535   |  | AY674579   | EU002150   |
| Malpighiales | Malpighiaceae   | <i>Acridocarpus natalitius</i>       | AF344455   | AY788200   | AF344525   |  | AY674573   |            |
| Malpighiales | Malpighiaceae   | <i>Tetrapterys glabrifolia</i>       | AB233903   | AB233695   | AB233799   |  | AB233591   |            |
| Malpighiales | Malpighiaceae   | <i>Thryallis latifolia</i>           | AF344516   |            | AF344580   |  |            |            |

|              |                  |                                     |            |            |            |            |            |
|--------------|------------------|-------------------------------------|------------|------------|------------|------------|------------|
| Malpighiales | Malpighiaceae    | <i>Thryallis longifolia</i>         |            | AY788258   |            | AY674638   |            |
| Malpighiales | Malpighiaceae    | <i>Dicella nucifera</i>             | AJ235802   | AJ235453   | AF344541   | AF206901   |            |
| Malpighiales | Malpighiaceae    | <i>Malpighia emarginata</i>         | 14599571   |            | 14599701   |            |            |
| Malpighiales | Malpighiaceae    | <i>Malpighia coccigera</i>          |            | 8439434    |            | 398579     |            |
| Malpighiales | Phyllanthaceae   | <i>Aporusa frutescens</i>           | Z75674     | AY788201   | 51831167   | AY788147   |            |
| Malpighiales | Phyllanthaceae   | <i>Bischofia javanica</i>           | AY663571.1 | AY830200.1 | EF135508.1 | AB233605.1 | EF135606.1 |
| Malpighiales | Phyllanthaceae   | <i>Phyllanthus flexuosus</i>        | AY663603   | AB233713.1 |            | AB233609.1 |            |
| Malpighiales | Phyllanthaceae   | <i>Phyllanthus myrtifolius</i>      |            |            | AY936616.1 |            |            |
| Malpighiales | Phyllanthaceae   | <i>Phyllanthus calcinus</i>         |            |            |            |            | EU002156.1 |
| Malpighiales | Phyllanthaceae   | <i>Heywoodia lucens</i>             | AY663587   | AY788224   | AM745937   | AY674602   |            |
| Malpighiales | Phyllanthaceae   | <i>Lachnostylis bilocularis</i>     | 17066146   | AY830218   |            | AY674611   |            |
| Malpighiales | Phyllanthaceae   | <i>Lachnostylis sp.</i>             |            |            | 51831197   |            |            |
| Malpighiales | Phyllanthaceae   | <i>Croizatia brevipetiolata</i>     | AY663579   | AY788213   | FJ670033.1 | AY788148   |            |
| Malpighiales | Picrodendraceae  | <i>Podocalyx loranthoides</i>       | AY663647   | AY788248   | EF135583   | AY674629   |            |
| Malpighiales | Picrodendraceae  | <i>Tetracoccus dioicus</i>          | AY788190   | AY788256   | FJ670035.1 | AY788158   |            |
| Malpighiales | Picrodendraceae  | <i>Androstachys johnsonii</i>       | AF206734.1 | AF209527.1 | AY552461.1 | AF206848.1 | AF479123.1 |
| Malpighiales | Picrodendraceae  | <i>Petalostigma pubescens</i>       | AY380357   | AY788245   | EF135579   | AY674626   |            |
| Malpighiales | Picrodendraceae  | <i>Dissiliaria muelleri</i>         | AY380346   | 257853487  | EF135528   | FJ669707.1 |            |
| Malpighiales | Picrodendraceae  | <i>Micrantheum hexandrum</i>        | AJ418816   | AY788237   | EF135569   | AY674617   |            |
| Malpighiales | Picrodendraceae  | <i>Austrobuxus megacarpus</i>       | AY380343   | AY788204   | EF135504   | AY674576   |            |
| Malpighiales | Putranjivaceae   | <i>Drypetes roxburghii</i>          | M95757     |            |            | U42534     |            |
| Malpighiales | Putranjivaceae   | <i>Drypetes madagascariensis</i>    |            | AY830256   | AY552457   |            |            |
| Malpighiales | Lohopyxidaceae   | <i>Lophopyxis maingayi</i>          | AY663643   | AY788235   | EF135560   | AY674614   |            |
| Malpighiales | Ctenolophonaceae | <i>Ctenolophon englerianus</i>      | AJ402940   | AY788215   | EF135524   | AY674589   |            |
| Malpighiales | Erythroxylaceae  | <i>Erythroxylum confusum</i>        | L13183     | AJ235466   |            | AF206909   |            |
| Malpighiales | Erythroxylaceae  | <i>Erythroxylum coca</i>            |            |            | EF135536   |            | EF135611   |
| Malpighiales | Erythroxylaceae  | <i>Aneulophus africanus</i>         | FJ670166   | FJ669973   | FJ670010   | FJ669694   |            |
| Malpighiales | Rhizophoraceae   | <i>Paradrypetes subintegrifolia</i> | 257783279  | AY788243   | FJ670039.1 | AY788154   |            |
| Malpighiales | Rhizophoraceae   | <i>Cassipourea lanceolata</i>       | FJ670174   | FJ669988   | FJ670038   | FJ669713   |            |
| Malpighiales | Rhizophoraceae   | <i>Crossostylis grandiflora</i>     | AF006760   | AB233721   | AB233825   | AB233617   |            |
| Malpighiales | Rhizophoraceae   | <i>Rhizophora stylosa</i>           | AF127686   |            | AF105092   | AY289627   |            |
| Malpighiales | Rhizophoraceae   | <i>Rhizophora racemosa</i>          |            |            |            |            | AF224693   |
| Malpighiales | Rhizophoraceae   | <i>Bruguiera gymnorhiza</i>         | U26320     | AF209547   | EF135511   | AF206875   |            |
| Malpighiales | Rhizophoraceae   | <i>Carallia sp.</i>                 | AF206744   |            |            |            |            |
| Malpighiales | Rhizophoraceae   | <i>Carallia brachiata</i>           |            | AJ235425   | EF135513   | 257853458  |            |
| Malpighiales | Pandaceae        | <i>Microdesmis pierlotiana</i>      | AY663645   |            |            | AY674618   |            |
| Malpighiales | Pandaceae        | <i>Microdesmis puberula</i>         |            | AY788238   | EF135570   |            |            |
| Malpighiales | Pandaceae        | <i>Panda oleosa</i>                 | AY663644   | AY788242   | FJ670032.1 | AY788153   |            |
| Malpighiales | Pandaceae        | <i>Galearia filiformis</i>          | AJ418818   | AY788222   | EF135542   | AY674598   |            |

|              |                  |                                   |            |            |            |            |            |
|--------------|------------------|-----------------------------------|------------|------------|------------|------------|------------|
| Malpighiales | Centroplacaceae  | <i>Centroplacus glaucinus</i>     | AY663646   | AY788207   | FJ670002.1 | AY674582   |            |
| Malpighiales | Centroplacaceae  | <i>Bhesa paniculata</i>           | AY935722.1 | AY935825.1 | AY935897.1 | AY929340.1 | AY935793.1 |
| Malpighiales | Linaceae         | <i>Reinwardtia indica</i>         | L13188.2   | AJ235577.2 | AB048380.1 | AF207005.1 | AF479124.1 |
| Malpighiales | Linaceae         | <i>Linum arboreum</i>             | AY380351   |            |            |            |            |
| Malpighiales | Linaceae         | <i>Linum perenne</i>              |            | AJ235521   | AB038182   | L24401     |            |
| Malpighiales | Linaceae         | <i>Linum usitatissimum</i>        |            |            |            |            | EU307117.1 |
| Malpighiales | Linaceae         | <i>Durandea pentagyna</i>         | AY788173   | AY788218   | FJ670027.1 | AY788150   |            |
| Malpighiales | Linaceae         | <i>Hugonia platysepala</i>        | Z75678     |            |            | 51320376   |            |
| Malpighiales | Linaceae         | <i>Hugonia busseana</i>           |            |            | 219551909  |            |            |
| Malpighiales | Balanopaceae     | <i>Balanops vieillardii</i>       | AF206738   | AF209534   | EF135505   | AF206860   |            |
| Malpighiales | Trigoniaceae     | <i>Trigonia nivea</i>             | AF206830   |            | EF135598   | AF207047   |            |
| Malpighiales | Trigoniaceae     | <i>Trigonia boliviana</i>         |            | AB233640   |            |            |            |
| Malpighiales | Dichapetalaceae  | <i>Tapura fischeri</i>            | GQ424471   |            |            |            |            |
| Malpighiales | Dichapetalaceae  | <i>Tapura guianensis</i>          |            | 257852939  | FJ670009.1 | FJ669693.1 |            |
| Malpighiales | Dichapetalaceae  | <i>Dichapetalum rugosum</i>       | GQ424469   |            |            | GQ424451   |            |
| Malpighiales | Dichapetalaceae  | <i>Dichapetalum brownii</i>       |            | AJ235455   |            |            |            |
| Malpighiales | Dichapetalaceae  | <i>Dichapetalum macrocarpum</i>   |            |            | EF135527   |            |            |
| Malpighiales | Euphroniaceae    | <i>Euphronia guianensis</i>       | GQ424470   | AY788221   | EF135540   | AY674597   |            |
| Malpighiales | Chrysobalanaceae | <i>Hirtella bicornis</i>          | AF089756   | AY788225   | FJ670003.1 | AY674603   |            |
| Malpighiales | Chrysobalanaceae | <i>Licania elaeosperma</i>        | AB233846   | AB233638   | AB233742   | AB233534   |            |
| Malpighiales | Chrysobalanaceae | <i>Licania heteromorpha</i>       |            |            |            |            | AF222370   |
| Malpighiales | Chrysobalanaceae | <i>Atuna racemosa</i>             | AF089758   | AY788203   | EF135503   | AY674575   |            |
| Malpighiales | Chrysobalanaceae | <i>Chrysobalanus icaco</i>        | GQ424476   | AF209562   | EF135519   | U42519     | AF479119   |
| Malpighiales | Caryocaraceae    | <i>Caryocar glabrum</i>           | Z75671     | AF209556   | EF135515   | AF206881   |            |
| Malpighiales | Ochnaceae        | <i>Medusagyne oppositifolia</i>   | Z75670     | AJ235530   | FJ670030   | AF206959   | AF479120   |
| Malpighiales | Ochnaceae        | <i>Touroulia guianensis</i>       | Z75690     | 257852969  | FJ670037.1 | FJ669710.1 |            |
| Malpighiales | Ochnaceae        | <i>Quiina pteridophylla</i>       | AF206815   | AF209664   | EF135589   | AF207003   |            |
| Malpighiales | Ochnaceae        | <i>Luxemburgia ciliosa</i>        | Z75685     |            |            |            |            |
| Malpighiales | Ochnaceae        | <i>Luxemburgia octandra</i>       |            | 257852961  |            | FJ669705.1 |            |
| Malpighiales | Ochnaceae        | <i>Ochna sp.</i>                  | AY380354   | AY788240   |            | AY674620   |            |
| Malpighiales | Ochnaceae        | <i>Ochna multiflora</i>           |            |            | EF135572   |            |            |
| Malpighiales | Ochnaceae        | <i>Cespedesia bonplandi</i>       | AJ420168   | AY788208   | EF135518   | AY674583   |            |
| Malpighiales | Ochnaceae        | <i>Sauvagesia africana</i>        | AB233909   |            |            |            |            |
| Malpighiales | Ochnaceae        | <i>Sauvagesia calophyllum</i>     | Z75686     |            |            |            |            |
| Malpighiales | Ochnaceae        | <i>Sauvagesia erecta</i>          |            | FJ669984   | EF135593   | EF135604   | EF135618   |
| Malpighiales | Peraceae         | <i>Pogonophora schomburgkiana</i> | AY788185   | AY788250   | EF135585   | AY788156   | EF135614   |
| Malpighiales | Peraceae         | <i>Clutia pulchella</i>           | AM234976   |            | EF135521   |            | 133900035  |
| Malpighiales | Peraceae         | <i>Clutia tomentosa</i>           |            | AY788210   |            | AY674585   |            |
| Malpighiales | Peraceae         | <i>Pera bicolor</i>               | AY794968   | AY788244   | EF135578   | AY674624   | EF135613   |
| Malpighiales | Euphorbiaceae    | <i>Neoscortechinia kingii</i>     | AB267912   | AB267964   | EF135571   | AB268068   | EF135612   |
| Malpighiales | Euphorbiaceae    | <i>Endospermum moluccanum</i>     | AJ402950   | AY788220   | EF135533   | AY674595   | 133900038  |
| Malpighiales | Euphorbiaceae    | <i>Tetrorchidium gabonense</i>    | AY794872   |            |            |            |            |
| Malpighiales | Euphorbiaceae    | <i>Tetrorchidium sp.</i>          |            | AY788257   |            | AY788159   |            |

|              |               |                                      |          |           |            |            |            |
|--------------|---------------|--------------------------------------|----------|-----------|------------|------------|------------|
| Malpighiales | Euphorbiaceae | <i>Tetrorchidium rubrivenium</i>     |          |           | 155029460  |            |            |
| Malpighiales | Euphorbiaceae | <i>Omphalea diandra</i>              | AY788183 | AY788241  | FJ670016.1 | AY674622   |            |
| Malpighiales | Euphorbiaceae | <i>Suregada aequoreum</i>            | AY794867 |           |            |            |            |
| Malpighiales | Euphorbiaceae | <i>Suregada boiviniana</i>           |          | AY788255  |            | AY788157   |            |
| Malpighiales | Euphorbiaceae | <i>Suregada glomerulata</i>          |          |           | 155029458  |            |            |
| Malpighiales | Euphorbiaceae | <i>Moultonianthus leembruggianus</i> | AY794982 | 257852943 | FJ670015.1 | FJ669695.1 |            |
| Malpighiales | Euphorbiaceae | <i>Hevea brasiliensis</i>            | AB267943 |           | AB268047   |            |            |
| Malpighiales | Euphorbiaceae | <i>Hevea sp.</i>                     |          | AY788223  |            | AY674601   |            |
| Malpighiales | Euphorbiaceae | <i>Manihot esculenta</i>             | AB233880 | AB233672  | AB233776   | AB233568   | EU002153   |
| Malpighiales | Euphorbiaceae | <i>Croton trigonocarpus</i>          | EF405861 |           |            |            |            |
| Malpighiales | Euphorbiaceae | <i>Croton alabamensis</i>            |          | AY788214  |            | AY674588   |            |
| Malpighiales | Euphorbiaceae | <i>Croton kongensis</i>              |          |           | GQ434077   |            |            |
| Malpighiales | Euphorbiaceae | <i>Codiaeum peltatum</i>             | AB233876 | AB233668  |            |            |            |
| Malpighiales | Euphorbiaceae | <i>Codiaeum variegatum</i>           |          |           | EF135522   | AY674586   | EF135608.1 |
| Malpighiales | Euphorbiaceae | <i>Trigonostemon verrucosus</i>      | AY788192 | AY788259  | FJ670020.1 | AY788160   |            |
| Malpighiales | Euphorbiaceae | <i>Pimelodendron zoanthogyne</i>     | AJ418812 | AY788247  | EF135582   | AY674628   |            |
| Malpighiales | Euphorbiaceae | <i>Euphorbia polychroma</i>          | AY794827 | AJ235472  | EF135539   |            | AF479125   |
| Malpighiales | Euphorbiaceae | <i>Euphorbia pulcherrima</i>         |          |           |            | L37582     |            |
| Malpighiales | Euphorbiaceae | <i>Omalanthus populneus</i>          | AJ402978 |           |            |            |            |
| Malpighiales | Euphorbiaceae | <i>Homalanthus populneus</i>         |          | AY788226  | EF135548   | AY674604   |            |
| Malpighiales | Euphorbiaceae | <i>Hura crepitans</i>                | GQ981765 | AY788228  | 118917521  | AY674606   |            |
| Malpighiales | Euphorbiaceae | <i>Conceveiba martiana</i>           | AY788170 | AY788212  | FJ670011.1 |            |            |
| Malpighiales | Euphorbiaceae | <i>Lasiocroton bahamensis</i>        | AY788181 | AY788233  |            | AY788152   |            |
| Malpighiales | Euphorbiaceae | <i>Lasiocroton macrophyllus</i>      |          |           | 155029394  |            |            |
| Malpighiales | Euphorbiaceae | <i>Dalechampia spathulata</i>        | AY788172 | AY788216  | EF135525   | AY788149   | 133900037  |
| Malpighiales | Euphorbiaceae | <i>Ricinus communis</i>              | AY788188 | AY788253  | EF135590   | AY674633   |            |
| Malpighiales | Euphorbiaceae | <i>Spathiostemon javensis</i>        | AY788176 | AY788227  | FJ670017.1 | AY788151   |            |
| Malpighiales | Euphorbiaceae | <i>Acalypha californica</i>          | AY380341 | AY788199  | EF135499   | AY674572   | EF135605   |

**Supplementary Table 2.** Sampling fraction associated to each terminal. Sampling fraction associated to each species included as a terminal in diversification analyses. Each sampling fraction is derived from the total number of living species in the clade represented by each terminal, and the number of representatives for that clade. Clades correspond to a single, or two or more families.

| Order           | Family            | Clade                             | Terminal                      | Number of species in clade | Number of sampled species | Sampling fraction |
|-----------------|-------------------|-----------------------------------|-------------------------------|----------------------------|---------------------------|-------------------|
| Amborellales    | Amborellaceae     | Amborellaceae                     | <i>Amborella_trichopoda</i>   | 1                          | 1                         | 1.000000          |
| Nymphaeales     | Hydatellaceae     | Hydatellaceae                     | <i>Trithuria_submersa</i>     | 10                         | 1                         | 0.100000          |
| Nymphaeales     | Nymphaeaceae      | Nymphaeaceae                      | <i>Brasenia_schreberi</i>     | 64                         | 4                         | 0.062500          |
| Nymphaeales     | Nymphaeaceae      | Nymphaeaceae                      | <i>Cabomba_caroliniana</i>    | 64                         | 4                         | 0.062500          |
| Nymphaeales     | Nymphaeaceae      | Nymphaeaceae                      | <i>Nuphar_spp.</i>            | 64                         | 4                         | 0.062500          |
| Nymphaeales     | Nymphaeaceae      | Nymphaeaceae                      | <i>Nymphaea_spp.</i>          | 64                         | 4                         | 0.062500          |
| Austrobaileyles | Austrobaileyaceae | Austrobaileyaceae                 | <i>Austrobaileya_scandens</i> | 2                          | 1                         | 0.500000          |
| Austrobaileyles | Trimeniaceae      | Trimeniaceae                      | <i>Trimenia_moorei</i>        | 6                          | 1                         | 0.166667          |
| Austrobaileyles | Schisandraceae    | Schisandraceae                    | <i>Illicium_spp.</i>          | 92                         | 3                         | 0.032609          |
| Austrobaileyles | Schisandraceae    | Schisandraceae                    | <i>Kadsura_japonica</i>       | 92                         | 3                         | 0.032609          |
| Austrobaileyles | Schisandraceae    | Schisandraceae                    | <i>Schisandra_spp.</i>        | 92                         | 3                         | 0.032609          |
| Chloranthales   | Chloranthaceae    | Chloranthaceae                    | <i>Hedyosmum_arborescens</i>  | 75                         | 4                         | 0.053333          |
| Chloranthales   | Chloranthaceae    | Chloranthaceae                    | <i>Ascarina</i>               | 75                         | 4                         | 0.053333          |
| Chloranthales   | Chloranthaceae    | Chloranthaceae                    | <i>Chloranthus_spp.</i>       | 75                         | 4                         | 0.053333          |
| Chloranthales   | Chloranthaceae    | Chloranthaceae                    | <i>Sarcandra_spp.</i>         | 75                         | 4                         | 0.053333          |
| Canellales      | Canellaceae       | Canellaceae                       | <i>Canella_winterana</i>      | 13                         | 2                         | 0.153846          |
| Canellales      | Canellaceae       | Canellaceae                       | <i>Cinnamodendron_spp.</i>    | 13                         | 2                         | 0.153846          |
| Canellales      | Winteraceae       | Winteraceae                       | <i>Takhtajania_perrieri</i>   | 90                         | 3                         | 0.033333          |
| Canellales      | Winteraceae       | Winteraceae                       | <i>Drimys_spp.</i>            | 90                         | 3                         | 0.033333          |
| Canellales      | Winteraceae       | Winteraceae                       | <i>Tasmannia_spp.</i>         | 90                         | 3                         | 0.033333          |
| Piperales       | Piperaceae        | Piperaceae                        | <i>Peperomia_spp.</i>         | 3615                       | 2                         | 0.000553          |
| Piperales       | Piperaceae        | Piperaceae                        | <i>Piper_spp.</i>             | 3615                       | 2                         | 0.000553          |
| Piperales       | Saururaceae       | Saururaceae                       | <i>Houttuynia_cordata</i>     | 6                          | 3                         | 0.500000          |
| Piperales       | Saururaceae       | Saururaceae                       | <i>Anemopsis_californica</i>  | 6                          | 3                         | 0.500000          |
| Piperales       | Saururaceae       | Saururaceae                       | <i>Saururus_spp.</i>          | 6                          | 3                         | 0.500000          |
| Piperales       | Aristolochiaceae  | Aristolochiaceae plus Hydnoraceae | <i>Asarum_spp.</i>            | 487                        | 5                         | 0.010267          |
| Piperales       | Aristolochiaceae  | Aristolochiaceae plus Hydnoraceae | <i>Saruma</i>                 | 487                        | 5                         | 0.010267          |
| Piperales       | Aristolochiaceae  | Aristolochiaceae plus Hydnoraceae | <i>Lactoris_fernandeziana</i> | 487                        | 5                         | 0.010267          |

|             |                    |                                                                      |                                 |      |   |          |
|-------------|--------------------|----------------------------------------------------------------------|---------------------------------|------|---|----------|
| Piperales   | Aristolochiaceae   | Aristolochiaceae plus Hydnoraceae                                    | <i>Aristolochia_macrophylla</i> | 487  | 5 | 0.010267 |
| Piperales   | Aristolochiaceae   | Aristolochiaceae plus Hydnoraceae                                    | <i>Thottea_tomentosa</i>        | 487  | 5 | 0.010267 |
| Magnoliales | Himantandraceae    | Himantandraceae                                                      | <i>Galbulimima_belgraveana</i>  | 2    | 1 | 0.500000 |
| Magnoliales | Eupomatiaceae      | Eupomatiaceae                                                        | <i>Eupomatia_bennettii</i>      | 3    | 1 | 0.333333 |
| Magnoliales | Annonaceae         | Annonaceae                                                           | <i>Cananga_odorata</i>          | 2220 | 3 | 0.001351 |
| Magnoliales | Annonaceae         | Annonaceae                                                           | <i>Annona_muricata</i>          | 2220 | 3 | 0.001351 |
| Magnoliales | Annonaceae         | Annonaceae                                                           | <i>Asimina_triloba</i>          | 2220 | 3 | 0.001351 |
| Magnoliales | Magnoliaceae       | Magnoliaceae                                                         | <i>Liriodendron_spp.</i>        | 227  | 2 | 0.008811 |
| Magnoliales | Magnoliaceae       | Magnoliaceae                                                         | <i>Magnolia_spp.</i>            | 227  | 2 | 0.008811 |
| Magnoliales | Degeneriaceae      | Degeneriaceae                                                        | <i>Degeneria_vitiensis</i>      | 2    | 1 | 0.500000 |
| Magnoliales | Myristicaceae      | Myristicaceae                                                        | <i>Mauloutchia_chapelieri</i>   | 475  | 2 | 0.004211 |
| Magnoliales | Myristicaceae      | Myristicaceae                                                        | <i>Myristica_fragrans</i>       | 475  | 2 | 0.004211 |
| Laurales    | Calycanthaceae     | Calycanthaceae                                                       | <i>Idiospermum_australiense</i> | 11   | 3 | 0.272727 |
| Laurales    | Calycanthaceae     | Calycanthaceae                                                       | <i>Calycanthus_spp.</i>         | 11   | 3 | 0.272727 |
| Laurales    | Calycanthaceae     | Calycanthaceae                                                       | <i>Chimonanthus_praecox</i>     | 11   | 3 | 0.272727 |
| Laurales    | Siparunaceae       | Siparunaceae                                                         | <i>Siparuna_spp.</i>            | 75   | 1 | 0.013333 |
| Laurales    | Gomortegaceae      | Gomortegaceae                                                        | <i>Gomortega_keule</i>          | 1    | 1 | 1.000000 |
| Laurales    | Atherospermataceae | Atherospermataceae                                                   | <i>Doryphora_spp.</i>           | 16   | 3 | 0.187500 |
| Laurales    | Atherospermataceae | Atherospermataceae                                                   | <i>Atherosperma</i>             | 16   | 3 | 0.187500 |
| Laurales    | Atherospermataceae | Atherospermataceae                                                   | <i>Daphnandra</i>               | 16   | 3 | 0.187500 |
| Laurales    | Lauraceae          | Lauraceae                                                            | <i>Cryptocarya_spp.</i>         | 2500 | 4 | 0.001600 |
| Laurales    | Lauraceae          | Lauraceae                                                            | <i>Cinnamomum_camphora</i>      | 2500 | 4 | 0.001600 |
| Laurales    | Lauraceae          | Lauraceae                                                            | <i>Laurus_nobilis</i>           | 2500 | 4 | 0.001600 |
| Laurales    | Lauraceae          | Lauraceae                                                            | <i>Sassafras_spp.</i>           | 2500 | 4 | 0.001600 |
| Laurales    | Hernandiaceae      | Hernandiaceae                                                        | <i>Gyrocarpus_spp.</i>          | 55   | 2 | 0.036364 |
| Laurales    | Hernandiaceae      | Hernandiaceae                                                        | <i>Hernandia_spp.</i>           | 55   | 2 | 0.036364 |
| Laurales    | Monimiaceae        | Monimiaceae                                                          | <i>Peumus_boldus</i>            | 200  | 3 | 0.015000 |
| Laurales    | Monimiaceae        | Monimiaceae                                                          | <i>Hedycarya_arborea</i>        | 200  | 3 | 0.015000 |
| Laurales    | Monimiaceae        | Monimiaceae                                                          | <i>Hortonia_floribunda</i>      | 200  | 3 | 0.015000 |
| Acorales    | Acoraceae          | Acoraceae                                                            | <i>Acorus_gramineus</i>         | 4    | 1 | 0.250000 |
| Alismatales | Araceae            | Araceae                                                              | <i>Orontium_aquaticum</i>       | 4095 | 4 | 0.000977 |
| Alismatales | Araceae            | Araceae                                                              | <i>Lemna</i>                    | 4095 | 4 | 0.000977 |
| Alismatales | Araceae            | Araceae                                                              | <i>Spathiphyllum_spp.</i>       | 4095 | 4 | 0.000977 |
| Alismatales | Araceae            | Araceae                                                              | <i>Xanthosoma</i>               | 4095 | 4 | 0.000977 |
| Alismatales | Tofieldiaceae      | Tofieldiaceae                                                        | <i>Pleea_tenuifolia</i>         | 31   | 2 | 0.064516 |
| Alismatales | Tofieldiaceae      | Tofieldiaceae                                                        | <i>Tofieldia_calyculata</i>     | 31   | 2 | 0.064516 |
| Alismatales | Potamogetonaceae   | Potamogetonaceae plus Zosteraceae plus Cymodoceaceae plus Ruppiaceae | <i>Potamogeton_spp.</i>         | 152  | 1 | 0.006579 |

|               |                  |                               |                                   |      |   |          |
|---------------|------------------|-------------------------------|-----------------------------------|------|---|----------|
|               |                  | plus<br>Posidoniaceae         |                                   |      |   |          |
|               |                  | plus<br>Maundiaceae           |                                   |      |   |          |
| Alismatales   | Juncaginaceae    | Juncaginaceae                 | <i>Triglochin_maritima</i>        | 59   | 1 | 0.016949 |
|               |                  | plus<br>Scheuchzeriaceae      |                                   |      |   |          |
|               |                  | e plus<br>Aponogetonaceae     |                                   |      |   |          |
| Alismatales   | Alismataceae     | Alismataceae                  | <i>Alisma</i>                     | 88   | 1 | 0.011364 |
| Alismatales   | Hydrocharitaceae | Hydrocharitaceae              | <i>Hydrocharis_spp.</i>           | 117  | 2 | 0.017094 |
|               |                  | plus<br>Butomaceae            |                                   |      |   |          |
| Alismatales   | Hydrocharitaceae | Hydrocharitaceae              | <i>Najas_spp.</i>                 | 117  | 2 | 0.017094 |
|               |                  | e plus<br>Butomaceae          |                                   |      |   |          |
| Petrosaviales | Petrosaviaceae   | Petrosaviaceae                | <i>Japonolirion_osense</i>        | 4    | 2 | 0.500000 |
| Petrosaviales | Petrosaviaceae   | Petrosaviaceae                | <i>Petrosavia_spp.</i>            | 4    | 2 | 0.500000 |
| Dioscoreales  | Nartheciaceae    | Nartheciaceae                 | <i>Metanarthecium_luteoviride</i> | 41   | 1 | 0.024390 |
| Dioscoreales  | Taccaceae        | Taccaceae plus<br>Thismiaceae | <i>Tacca_spp.</i>                 | 67   | 1 | 0.014925 |
| Dioscoreales  | Burmanniaceae    | Burmanniaceae                 | <i>Burmannia_spp.</i>             | 95   | 1 | 0.010526 |
| Dioscoreales  | Dioscoreaceae    | Dioscoreaceae                 | <i>Dioscorea_spp.</i>             | 870  | 1 | 0.001149 |
| Pandanales    | Cyclanthaceae    | Cyclanthaceae                 | <i>Carludovica_palmata</i>        | 1110 | 1 | 0.000901 |
|               |                  | plus<br>Pandanaceae           |                                   |      |   |          |
| Pandanales    | Stemonaceae      | Stemonaceae                   | <i>Croomia_pauciflora</i>         | 27   | 1 | 0.037037 |
| Pandanales    | Velloziaceae     | Velloziaceae                  | <i>Acanthochlamys_bracteata</i>   | 290  | 3 | 0.010345 |
|               |                  | plus<br>Triuridaceae          |                                   |      |   |          |
| Pandanales    | Velloziaceae     | Velloziaceae                  | <i>Barbacenia_elegans</i>         | 290  | 3 | 0.010345 |
|               |                  | plus<br>Triuridaceae          |                                   |      |   |          |
| Pandanales    | Velloziaceae     | Velloziaceae                  | <i>Xerophyta_spp.</i>             | 290  | 3 | 0.010345 |
|               |                  | plus<br>Triuridaceae          |                                   |      |   |          |
| Liliales      | Campynemataceae  | Campynemataceae               | <i>Campynema_linearis</i>         | 34   | 1 | 0.029412 |
|               |                  | ae plus<br>Corsiaceae         |                                   |      |   |          |
| Liliales      | Melanthiaceae    | Melanthiaceae                 | <i>Trillium_spp.</i>              | 170  | 1 | 0.005882 |
| Liliales      | Colchicaceae     | Colchicaceae                  | <i>Colchicum_spp.</i>             | 246  | 1 | 0.004065 |
|               |                  | plus<br>Petermaniaceae        |                                   |      |   |          |
| Liliales      | Alstroemeriaceae | Alstroemeriaceae              | <i>Alstroemeria_spp.</i>          | 170  | 2 | 0.011765 |
|               |                  | e plus<br>Luzuriagaceae       |                                   |      |   |          |
| Liliales      | Alstroemeriaceae | Alstroemeriaceae              | <i>Bomarea_spp.</i>               | 170  | 2 | 0.011765 |
|               |                  | e plus<br>Luzuriagaceae       |                                   |      |   |          |



|                            |                  |                                                      |                                           |       |   |          |
|----------------------------|------------------|------------------------------------------------------|-------------------------------------------|-------|---|----------|
| Liliales                   | Philesiaceae     | Philesiaceae<br>plus<br>Rhipogonaceae                | <i>Lapageria_rosea</i>                    | 8     | 2 | 0.250000 |
| Liliales                   | Philesiaceae     | Philesiaceae<br>plus<br>Rhipogonaceae                | <i>Philesia_buxifolia</i>                 | 8     | 2 | 0.250000 |
| Liliales                   | Liliaceae        | Liliaceae                                            | <i>Lilium_spp.</i>                        | 610   | 1 | 0.001639 |
| Liliales                   | Smilacaceae      | Smilacaceae                                          | <i>Smilax_glauca</i>                      | 315   | 1 | 0.003175 |
| Asparagales                | Orchidaceae      | Orchidaceae                                          | <i>Cypripedium_spp.</i>                   | 22075 | 3 | 0.000136 |
| Asparagales                | Orchidaceae      | Orchidaceae                                          | <i>Oncidium</i>                           | 22075 | 3 | 0.000136 |
| Asparagales                | Orchidaceae      | Orchidaceae                                          | <i>Phalaenopsis</i>                       | 22075 | 3 | 0.000136 |
| Asparagales                | Boryaceae        | Boryaceae                                            | <i>Borya_septentrionalis</i>              | 12    | 1 | 0.083333 |
| Asparagales                | Blandfordiaceae  | Blandfordiaceae                                      | <i>Blandfordia</i>                        | 4     | 1 | 0.250000 |
| Asparagales                | Hypoxidaceae     | Hypoxidaceae<br>plus Asteliaceae<br>plus Lanariaceae | <i>Molineria_capitulata</i>               | 257   | 3 | 0.011673 |
| Asparagales                | Hypoxidaceae     | Hypoxidaceae<br>plus Asteliaceae<br>plus Lanariaceae | <i>Hypoxis_spp.</i>                       | 257   | 3 | 0.011673 |
| Asparagales                | Hypoxidaceae     | Hypoxidaceae<br>plus Asteliaceae<br>plus Lanariaceae | <i>Rhodohypoxis_millioi</i><br><i>es</i>  | 257   | 3 | 0.011673 |
| Asparagales                | Ixioliriaceae    | Ixiolirionaceae                                      | <i>Ixiolirion_tataricum</i>               | 3     | 1 | 0.333333 |
| Asparagales                | Tecophilaeaceae  | Tecophilaceae                                        | <i>Tecophilaea_cyanocro</i><br><i>cus</i> | 25    | 1 | 0.040000 |
| Asparagales                | Iridaceae        | Iridaceae plus<br>Doriantaceae                       | <i>Alophia_drummondii</i>                 | 2037  | 4 | 0.001964 |
| Asparagales                | Iridaceae        | Iridaceae plus<br>Doriantaceae                       | <i>Iris</i>                               | 2037  | 4 | 0.001964 |
| Asparagales                | Iridaceae        | Iridaceae plus<br>Doriantaceae                       | <i>Aristea_glauca</i>                     | 2037  | 4 | 0.001964 |
| Asparagales                | Iridaceae        | Iridaceae plus<br>Doriantaceae                       | <i>Gladiolus_buckerveldii</i>             | 2037  | 4 | 0.001964 |
| Asparagales                | Asphodelaceae    | Asphodelaceae                                        | <i>Bulbine_spp.</i>                       | 785   | 1 | 0.001274 |
| Asparagales                | Xanthorrhoeaceae | Xanthorrhoeaceae<br>plus<br>Xeronemataceae           | <i>Xanthorrhoea</i>                       | 117   | 1 | 0.008547 |
| Asparagales                | Amaryllidaceae   | Amaryllidaceae                                       | <i>Crinum_spp.</i>                        | 1605  | 3 | 0.001869 |
| Asparagales                | Amaryllidaceae   | Amaryllidaceae                                       | <i>Allium</i>                             | 1605  | 3 | 0.001869 |
| Asparagales                | Amaryllidaceae   | Amaryllidaceae                                       | <i>Nothoscordum_spp.</i>                  | 1605  | 3 | 0.001869 |
| Asparagales                | Asparagaceae     | Asparagaceae                                         | <i>Asparagus_spp.</i>                     | 2480  | 5 | 0.002016 |
| Asparagales                | Asparagaceae     | Asparagaceae                                         | <i>Agave</i>                              | 2480  | 5 | 0.002016 |
| Asparagales                | Asparagaceae     | Asparagaceae                                         | <i>Yucca</i>                              | 2480  | 5 | 0.002016 |
| Asparagales                | Asparagaceae     | Asparagaceae                                         | <i>Beaucarnea</i>                         | 2480  | 5 | 0.002016 |
| Asparagales                | Asparagaceae     | Asparagaceae                                         | <i>Lomandra</i>                           | 2480  | 5 | 0.002016 |
| unplaced<br>Dasypogonaceae | Dasypogonaceae   | Dasypogonaceae                                       | <i>Calectasia_spp.</i>                    | 16    | 2 | 0.125000 |
| unplaced<br>Dasypogonaceae | Dasypogonaceae   | Dasypogonaceae                                       | <i>Dasypogon_bromeliifolius</i>           | 16    | 2 | 0.125000 |
| Arecales                   | Arecaceae        | Arecaceae                                            | <i>Chamaedorea</i>                        | 2361  | 5 | 0.002118 |

|                 |                  |                                       |                                       |       |   |          |
|-----------------|------------------|---------------------------------------|---------------------------------------|-------|---|----------|
| Arecales        | Arecaceae        | Arecaceae                             | <i>Elaeis</i>                         | 2361  | 5 | 0.002118 |
| Arecales        | Arecaceae        | Arecaceae                             | <i>Caryota_mitis</i>                  | 2361  | 5 | 0.002118 |
| Arecales        | Arecaceae        | Arecaceae                             | <i>Phoenix_dactylifera</i>            | 2361  | 5 | 0.002118 |
| Arecales        | Arecaceae        | Arecaceae                             | <i>Trachycarpus_fortunei</i>          | 2361  | 5 | 0.002118 |
| Commelinales    | Commelinaceae    | Commelinaceae<br>plus<br>Hanguanaceae | <i>Tradescantia_spp.</i>              | 662   | 1 | 0.001511 |
| Commelinales    | Philydraceae     | Philydraceae                          | <i>Philydrum_lanuginosu<br/>m</i>     | 5     | 1 | 0.200000 |
| Commelinales    | Haemodoraceae    | Haemodoraceae                         | <i>Anigozanthos_flavidus</i>          | 116   | 1 | 0.008621 |
| Commelinales    | Pontederiaceae   | Pontederiaceae                        | <i>Pontederia_cordata</i>             | 33    | 1 | 0.030303 |
| Zingiberales    | Strelitziaceae   | Strelitziaceae<br>plus Lowiaceae      | <i>Strelitzia</i>                     | 22    | 3 | 0.136364 |
| Zingiberales    | Strelitziaceae   | Strelitziaceae<br>plus Lowiaceae      | <i>Phenakospermum_guy<br/>annense</i> | 22    | 3 | 0.136364 |
| Zingiberales    | Strelitziaceae   | Strelitziaceae<br>plus Lowiaceae      | <i>Ravenala_madagascar<br/>iensis</i> | 22    | 3 | 0.136364 |
| Zingiberales    | Musaceae         | Musaceae plus<br>Heliconiaceae        | <i>Musa_spp.</i>                      | 241   | 1 | 0.004149 |
| Zingiberales    | Zingiberaceae    | Zingiberaceae<br>plus Costaceae       | <i>Zingiber_spp.</i>                  | 1450  | 1 | 0.000690 |
| Zingiberales    | Cannaceae        | Cannaceae                             | <i>Canna_spp.</i>                     | 10    | 1 | 0.100000 |
| Zingiberales    | Marantaceae      | Marantaceae                           | <i>Maranta_bicolor</i>                | 550   | 1 | 0.001818 |
| Poales          | Bromeliaceae     | Bromeliaceae                          | <i>Puya_raimondii</i>                 | 1770  | 2 | 0.001130 |
| Poales          | Bromeliaceae     | Bromeliaceae                          | <i>Vriesea</i>                        | 1770  | 2 | 0.001130 |
| Poales          | Typhaceae        | Typhaceae                             | <i>Sparganium</i>                     | 25    | 2 | 0.080000 |
| Poales          | Typhaceae        | Typhaceae                             | <i>Typha_spp.</i>                     | 25    | 2 | 0.080000 |
| Poales          | Rapateaceae      | Rapateaceae                           | <i>Stegolepis</i>                     | 94    | 1 | 0.010638 |
| Poales          | Eriocaulaceae    | Eriocaulaceae                         | <i>Eriocaulon_spp.</i>                | 1160  | 1 | 0.000862 |
| Poales          | Xyridaceae       | Xyridaceae                            | <i>Xyris_spp.</i>                     | 260   | 1 | 0.003846 |
| Poales          | Mayacaceae       | Mayacaceae                            | <i>Mayaca_spp.</i>                    | 10    | 1 | 0.100000 |
| Poales          | Juncaceae        | Juncaceae plus<br>Thurniaceae         | <i>Juncus_effusus</i>                 | 434   | 1 | 0.002304 |
| Poales          | Cyperaceae       | Cyperaceae                            | <i>Cyperus_spp.</i>                   | 5430  | 2 | 0.000368 |
| Poales          | Cyperaceae       | Cyperaceae                            | <i>Rhynchospora_spp.</i>              | 5430  | 2 | 0.000368 |
| Poales          | Anarthriaceae    | Anarthriaceae                         | <i>Anarthria_spp.</i>                 | 11    | 1 | 0.090909 |
| Poales          | Centrolepidaceae | Centrolepidaceae                      | <i>Centrolepis_strigosa</i>           | 35    | 1 | 0.028571 |
| Poales          | Restionaceae     | Restionaceae                          | <i>Restio_spp.</i>                    | 500   | 1 | 0.002000 |
| Poales          | Flagellariaceae  | Flagellariaceae                       | <i>Flagellaria_indica</i>             | 4     | 1 | 0.250000 |
| Poales          | Ecdeiocolaceae   | Ecdeiocolaceae                        | <i>Ecdeiocola_monostac<br/>hya</i>    | 3     | 1 | 0.333333 |
| Poales          | Joinvilleaceae   | Joinvilleaceae                        | <i>Joinvillea_spp.</i>                | 2     | 1 | 0.500000 |
| Poales          | Poaceae          | Poaceae                               | <i>Oryza_sativa</i>                   | 11337 | 5 | 0.000441 |
| Poales          | Poaceae          | Poaceae                               | <i>Hordeum</i>                        | 11337 | 5 | 0.000441 |
| Poales          | Poaceae          | Poaceae                               | <i>Danthonia_spp.</i>                 | 11337 | 5 | 0.000441 |
| Poales          | Poaceae          | Poaceae                               | <i>Saccharum</i>                      | 11337 | 5 | 0.000441 |
| Poales          | Poaceae          | Poaceae                               | <i>Zea</i>                            | 11337 | 5 | 0.000441 |
| Ceratophyllales | Ceratophyllaceae | Ceratophyllaceae                      | <i>Ceratophyllum_demer<br/>sum</i>    | 6     | 1 | 0.166667 |
| Ranunculales    | Eupteleaceae     | Eupteleaceae                          | <i>Euptelea_polyandra</i>             | 2     | 1 | 0.500000 |
| Ranunculales    | Papaveraceae     | Papaveraceae                          | <i>Eschscholzia</i>                   | 760   | 3 | 0.003947 |
| Ranunculales    | Papaveraceae     | Papaveraceae                          | <i>Dicentra_spp.</i>                  | 760   | 3 | 0.003947 |

|                 |                  |                                                           |                                   |      |   |          |
|-----------------|------------------|-----------------------------------------------------------|-----------------------------------|------|---|----------|
| Ranunculales    | Papaveraceae     | Papaveraceae                                              | <i>Hypecoum</i>                   | 760  | 3 | 0.003947 |
| Ranunculales    | Circaeasteraceae | Circaeasteraceae                                          | <i>Circaeaster_agrestis</i>       | 2    | 2 | 1.000000 |
| Ranunculales    | Circaeasteraceae | Circaeasteraceae                                          | <i>Kingdonia_uniflora</i>         | 2    | 2 | 1.000000 |
| Ranunculales    | Lardizabalaceae  | Lardizabalaceae                                           | <i>Akebia_quinata</i>             | 40   | 4 | 0.100000 |
| Ranunculales    | Lardizabalaceae  | Lardizabalaceae                                           | <i>Lardizabala_biternata</i>      | 40   | 4 | 0.100000 |
| Ranunculales    | Lardizabalaceae  | Lardizabalaceae                                           | <i>Decaisnea</i>                  | 40   | 4 | 0.100000 |
| Ranunculales    | Lardizabalaceae  | Lardizabalaceae                                           | <i>Sargentodoxa</i>               | 40   | 4 | 0.100000 |
| Ranunculales    | Menispermaceae   | Menispermaceae                                            | <i>Cissampelos_paireira</i>       | 442  | 4 | 0.009050 |
| Ranunculales    | Menispermaceae   | Menispermaceae                                            | <i>Cocculus_spp.</i>              | 442  | 4 | 0.009050 |
| Ranunculales    | Menispermaceae   | Menispermaceae                                            | <i>Menispermum</i>                | 442  | 4 | 0.009050 |
| Ranunculales    | Menispermaceae   | Menispermaceae                                            | <i>Tinospora</i>                  | 442  | 4 | 0.009050 |
| Ranunculales    | Berberidaceae    | Berberidaceae                                             | <i>Mahonia_spp.</i>               | 701  | 4 | 0.005706 |
| Ranunculales    | Berberidaceae    | Berberidaceae                                             | <i>Podophyllum_peltatum</i>       | 701  | 4 | 0.005706 |
| Ranunculales    | Berberidaceae    | Berberidaceae                                             | <i>Caulophyllum_thalictroides</i> | 701  | 4 | 0.005706 |
| Ranunculales    | Berberidaceae    | Berberidaceae                                             | <i>Nandina_domestica</i>          | 701  | 4 | 0.005706 |
| Ranunculales    | Ranunculaceae    | Ranunculaceae                                             | <i>Glaucidium_palmatum</i>        | 2525 | 4 | 0.001584 |
| Ranunculales    | Ranunculaceae    | Ranunculaceae                                             | <i>Hydrastis_canadensis</i>       | 2525 | 4 | 0.001584 |
| Ranunculales    | Ranunculaceae    | Ranunculaceae                                             | <i>Ranunculus_spp.</i>            | 2525 | 4 | 0.001584 |
| Ranunculales    | Ranunculaceae    | Ranunculaceae                                             | <i>Xanthorhiza_simplicissima</i>  | 2525 | 4 | 0.001584 |
| Sabiales        | Sabiaceae        | Sabiaceae                                                 | <i>Meliosma_veitchiorum</i>       | 100  | 2 | 0.020000 |
| Sabiales        | Sabiaceae        | Sabiaceae                                                 | <i>Sabia</i>                      | 100  | 2 | 0.020000 |
| Proteales       | Nelumbonaceae    | Nelumbonaceae                                             | <i>Nelumbo_lutea</i>              | 2    | 1 | 0.500000 |
| Proteales       | Platanaceae      | Platanaceae                                               | <i>Platanus_occidentalis</i>      | 10   | 1 | 0.100000 |
| Proteales       | Proteaceae       | Proteaceae                                                | <i>Petrophile</i>                 | 1600 | 3 | 0.001875 |
| Proteales       | Proteaceae       | Proteaceae                                                | <i>Grevillea_spp.</i>             | 1600 | 3 | 0.001875 |
| Proteales       | Proteaceae       | Proteaceae                                                | <i>Roupala</i>                    | 1600 | 3 | 0.001875 |
| Trochodendrales | Trochodendraceae | Trochodendraceae                                          | <i>Tetracentron_sinense</i>       | 2    | 2 | 1.000000 |
| Trochodendrales | Trochodendraceae | Trochodendraceae                                          | <i>Trochodendron_aralioides</i>   | 2    | 2 | 1.000000 |
| Buxales         | Didymelaceae     | Didymelaceae                                              | <i>Didymeles_perrieri</i>         | 2    | 1 | 0.500000 |
| Buxales         | Buxaceae         | Buxaceae                                                  | <i>Buxus sempervirens</i>         | 70   | 2 | 0.028571 |
| Buxales         | Buxaceae         | Buxaceae                                                  | <i>Pachysandra_spp.</i>           | 70   | 2 | 0.028571 |
| Gunnerales      | Gunneraceae      | Gunneraceae                                               | <i>Gunnera_spp.</i>               | 50   | 1 | 0.020000 |
| Gunnerales      | Myrothamnaceae   | Myrothamnaceae                                            | <i>Myrothamnus_spp.</i>           | 2    | 1 | 0.500000 |
| Dilleniales     | Dilleniaceae     | Dilleniaceae                                              | <i>Dillenia_spp.</i>              | 410  | 3 | 0.007317 |
| Dilleniales     | Dilleniaceae     | Dilleniaceae                                              | <i>Hibbertia</i>                  | 410  | 3 | 0.007317 |
| Dilleniales     | Dilleniaceae     | Dilleniaceae                                              | <i>Tetracera_asiatica</i>         | 410  | 3 | 0.007317 |
| Santalales      | Coulaceae        | Coulaceae plus<br>Erythralaceae<br>plus<br>Strombosiaceae | <i>Ochanostachys_amentacea</i>    | 61   | 3 | 0.049180 |

|                       |                        |                                                             |                                           |      |   |          |
|-----------------------|------------------------|-------------------------------------------------------------|-------------------------------------------|------|---|----------|
| Santalales            | Coulaceae              | Coulaceae plus<br>Erythropalaceae<br>plus<br>Strombosiaceae | <i>Coula_edulis</i>                       | 61   | 3 | 0.049180 |
| Santalales            | Coulaceae              | Coulaceae plus<br>Erythropalaceae<br>plus<br>Strombosiaceae | <i>Minquartia_guianensi</i><br><i>s</i>   | 61   | 3 | 0.049180 |
| Santalales            | Olacaceae              | Olacaceae plus<br>Ximeniaceae<br>plus<br>Aptandraceae       | <i>Heisteria_spp.</i>                     | 104  | 2 | 0.019231 |
| Santalales            | Olacaceae              | Olacaceae plus<br>Ximeniaceae<br>plus<br>Aptandraceae       | <i>Ximenia_americana</i>                  | 104  | 2 | 0.019231 |
| Santalales            | Santalaceae            | Santalaceae                                                 | <i>Osyris_spp.</i>                        | 990  | 2 | 0.002020 |
| Santalales            | Santalaceae            | Santalaceae                                                 | <i>Santalum_album</i>                     | 990  | 2 | 0.002020 |
| Santalales            | Opiliaceae             | Opiliaceae plus<br>Octoknemaceae                            | <i>Opilia_spp.</i>                        | 50   | 1 | 0.020000 |
| Santalales            | Loranthaceae           | Loranthaceae                                                | <i>Gaiadendron</i>                        | 950  | 1 | 0.001053 |
| Santalales            | Misodendraceae         | Misodendraceae                                              | <i>Misodendrum_spp.</i>                   | 8    | 1 | 0.125000 |
| Santalales            | Schoepfiaceae          | Schoepfiaceae                                               | <i>Schoepfia_schreberi</i>                | 55   | 1 | 0.018182 |
| Berberidopsid<br>ales | Aextoxicaceae          | Aextoxicaceae                                               | <i>Aextoxicon_punctatu</i><br><i>m</i>    | 1    | 1 | 1.000000 |
| Berberidopsid<br>ales | Berberidopsidac<br>eae | Berberidopsidac<br>eae                                      | <i>Berberidopsis_corallin</i><br><i>a</i> | 3    | 1 | 0.333333 |
| Caryophyllale<br>s    | Droseraceae            | Droseraceae                                                 | <i>Drosera_spp.</i>                       | 115  | 1 | 0.008696 |
| Caryophyllale<br>s    | Nepenthaceae           | Nepenthaceae                                                | <i>Nepenthes_spp.</i>                     | 90   | 1 | 0.011111 |
| Caryophyllale<br>s    | Drosophyllaceae        | Drosophyllaceae                                             | <i>Drosophyllum</i>                       | 1    | 1 | 1.000000 |
| Caryophyllale<br>s    | Ancistrocladace<br>ae  | Ancistrocladace<br>ae                                       | <i>Ancistrocladus</i>                     | 12   | 1 | 0.083333 |
| Caryophyllale<br>s    | Dioncophyllacea<br>e   | Dioncophyllacea<br>e                                        | <i>Triphyphyllum_peltat</i><br><i>um</i>  | 3    | 1 | 0.333333 |
| Caryophyllale<br>s    | Frankeniaceae          | Frankeniaceae                                               | <i>Frankenia</i>                          | 90   | 1 | 0.011111 |
| Caryophyllale<br>s    | Tamaricaceae           | Tamaricaceae                                                | <i>Tamarix_spp.</i>                       | 90   | 1 | 0.011111 |
| Caryophyllale<br>s    | Polygonaceae           | Polygonaceae                                                | <i>Fagopyrum</i>                          | 1110 | 2 | 0.001802 |
| Caryophyllale<br>s    | Polygonaceae           | Polygonaceae                                                | <i>Polygonum_spp.</i>                     | 1110 | 2 | 0.001802 |
| Caryophyllale<br>s    | Plumbaginaceae         | Plumbaginaceae                                              | <i>Limonium</i>                           | 836  | 2 | 0.002392 |
| Caryophyllale<br>s    | Plumbaginaceae         | Plumbaginaceae                                              | <i>Plumbago_spp.</i>                      | 836  | 2 | 0.002392 |
| Caryophyllale<br>s    | Rhabdodendrac<br>eae   | Rhabdodendrac<br>eae                                        | <i>Rhabdodendron_spp.</i>                 | 3    | 1 | 0.333333 |
| Caryophyllale<br>s    | Simmondsiaceae         | Simmondsiaceae                                              | <i>Simmondsia_chinensis</i>               | 1    | 1 | 1.000000 |

|                |                           |                                            |                              |      |   |          |
|----------------|---------------------------|--------------------------------------------|------------------------------|------|---|----------|
| Caryophyllales | Asteropeiaceae            | Asteropeiaceae                             | <i>Asteropeia_micraster</i>  | 8    | 1 | 0.125000 |
| Caryophyllales | Physenaceae               | Physenaceae                                | <i>Physena</i>               | 2    | 1 | 0.500000 |
| Caryophyllales | Caryophyllaceae           | Caryophyllaceae                            | <i>Stellaria_spp.</i>        | 2200 | 1 | 0.000455 |
| Caryophyllales | Achatocarpaceae           | Achatocarpaceae                            | <i>Phaulothamnus</i>         | 7    | 1 | 0.142857 |
| Caryophyllales | Amaranthaceae             | Amaranthaceae                              | <i>Spinacia</i>              | 2500 | 3 | 0.001200 |
| Caryophyllales | Amaranthaceae             | Amaranthaceae                              | <i>Beta</i>                  | 2500 | 3 | 0.001200 |
| Caryophyllales | Amaranthaceae             | Amaranthaceae                              | <i>Celosia_spp.</i>          | 2500 | 3 | 0.001200 |
| Caryophyllales | Stegospermataceae         | Stegnospermataceae                         | <i>Stegnosperma</i>          | 3    | 1 | 0.333333 |
| Caryophyllales | Limeaceae                 | Limeaceae                                  | <i>Limeum</i>                | 21   | 1 | 0.047619 |
| Caryophyllales | Lophiocarpaceae           | Lophiocarpaceae                            | <i>Corbichonia_decumbens</i> | 6    | 1 | 0.166667 |
| Caryophyllales | Barbeuiaceae              | Barbeuiaceae                               | <i>Barbeuia_spp.</i>         | 1    | 1 | 1.000000 |
| Caryophyllales | Aizoaceae                 | Aizoaceae                                  | <i>Delosperma</i>            | 2035 | 2 | 0.000983 |
| Caryophyllales | Aizoaceae                 | Aizoaceae                                  | <i>Lampranthus</i>           | 2035 | 2 | 0.000983 |
| Caryophyllales | Gisekiaceae               | Gisekiaceae                                | <i>Gisekia</i>               | 5    | 1 | 0.200000 |
| Caryophyllales | Phytolaccaceae            | Phytolaccaceae                             | <i>Phytolacca_americana</i>  | 65   | 2 | 0.030769 |
| Caryophyllales | Sarcobataceae             | Sarcobataceae                              | <i>Sarcobatus</i>            | 2    | 1 | 0.500000 |
| Caryophyllales | Phytolaccaceae            | Phytolaccaceae                             | <i>Rivina</i>                | 65   | 2 | 0.030769 |
| Caryophyllales | Nyctaginaceae             | Nyctaginaceae                              | <i>Bougainvillea_spp.</i>    | 395  | 2 | 0.005063 |
| Caryophyllales | Nyctaginaceae             | Nyctaginaceae                              | <i>Mirabilis_jalapa</i>      | 395  | 2 | 0.005063 |
| Caryophyllales | unassigned<br>Hypertellis | Hypertellis                                | <i>Hypertelis_spp.</i>       | 8    | 1 | 0.125000 |
| Caryophyllales | Molluginaceae             | Molluginaceae                              | <i>Mollugo_verticillata</i>  | 87   | 1 | 0.011494 |
| Caryophyllales | Montiaceae                | Montiaceae                                 | <i>Claytonia</i>             | 77   | 1 | 0.012987 |
| Caryophyllales | Talinaceae                | Talinaceae                                 | <i>Talinum</i>               | 27   | 1 | 0.037037 |
| Caryophyllales | Portulacaceae             | Portulacaceae<br>plus<br>Anacampserotaceae | <i>Portulaca_spp.</i>        | 132  | 1 | 0.007576 |
| Caryophyllales | Cactaceae                 | Cactaceae                                  | <i>Opuntia</i>               | 1866 | 2 | 0.001072 |

|                |                  |                                       |                              |      |   |          |
|----------------|------------------|---------------------------------------|------------------------------|------|---|----------|
| Caryophyllales | Cactaceae        | Cactaceae                             | <i>Pereskia_aculeata</i>     | 1866 | 2 | 0.001072 |
| Caryophyllales | Halophytaceae    | Halophytaceae                         | <i>Halophytum</i>            | 1    | 1 | 1.000000 |
| Caryophyllales | Didieraceae      | Didieraceae                           | <i>Alluaudia</i>             | 16   | 1 | 0.062500 |
| Caryophyllales | Basellaceae      | Basellaceae                           | <i>Anredera_cordifolia</i>   | 19   | 2 | 0.105263 |
| Caryophyllales | Basellaceae      | Basellaceae                           | <i>Basella</i>               | 19   | 2 | 0.105263 |
| Cornales       | Hydrostachyaceae | Hydrostachyaceae                      | <i>Hydrostachys_spp.</i>     | 20   | 1 | 0.050000 |
| Cornales       | Cornaceae        | Cornaceae                             | <i>Alangium_spp.</i>         | 85   | 2 | 0.023529 |
| Cornales       | Cornaceae        | Cornaceae                             | <i>Cornus_mas</i>            | 85   | 2 | 0.023529 |
| Cornales       | Nyssaceae        | Nyssaceae                             | <i>Camptotheca_acuminata</i> | 22   | 2 | 0.090909 |
| Cornales       | Nyssaceae        | Nyssaceae                             | <i>Nyssa_spp.</i>            | 22   | 2 | 0.090909 |
| Cornales       | Curtisiaceae     | Curtisiaceae                          | <i>Curtisia_dentata</i>      | 1    | 1 | 1.000000 |
| Cornales       | Grubbiaceae      | Grubbiaceae                           | <i>Grubbia_spp.</i>          | 3    | 1 | 0.333333 |
| Cornales       | Loasaceae        | Loasaceae                             | <i>Eucnide_spp.</i>          | 265  | 3 | 0.011321 |
| Cornales       | Loasaceae        | Loasaceae                             | <i>Mentzelia</i>             | 265  | 3 | 0.011321 |
| Cornales       | Loasaceae        | Loasaceae                             | <i>Petalonyx_spp.</i>        | 265  | 3 | 0.011321 |
| Cornales       | Hydrangeaceae    | Hydrangeaceae                         | <i>Fendlera_rupicola</i>     | 190  | 3 | 0.015789 |
| Cornales       | Hydrangeaceae    | Hydrangeaceae                         | <i>Hydrangea_spp.</i>        | 190  | 3 | 0.015789 |
| Cornales       | Hydrangeaceae    | Hydrangeaceae                         | <i>Philadelphus_spp.</i>     | 190  | 3 | 0.015789 |
| Ericales       | Marcgraviaceae   | Marcgraviaceae                        | <i>Marcgravia_spp.</i>       | 130  | 1 | 0.007692 |
| Ericales       | Balsaminaceae    | Balsaminaceae                         | <i>Impatiens_spp.</i>        | 1001 | 1 | 0.000999 |
| Ericales       | Tetrameristaceae | Tetrameristaceae                      | <i>Tetramerista_spp.</i>     | 5    | 1 | 0.200000 |
| Ericales       | Lecythidaceae    | Lecythidaceae                         | <i>Barringtonia_spp.</i>     | 340  | 2 | 0.005882 |
| Ericales       | Lecythidaceae    | Lecythidaceae                         | <i>Couropita</i>             | 340  | 2 | 0.005882 |
| Ericales       | Fouquieriaceae   | Fouquieriaceae                        | <i>Fouquieria_spp.</i>       | 11   | 1 | 0.090909 |
| Ericales       | Polemoniaceae    | Polemoniaceae                         | <i>Cobaea_scandens</i>       | 385  | 4 | 0.010390 |
| Ericales       | Polemoniaceae    | Polemoniaceae                         | <i>Gilia_spp.</i>            | 385  | 4 | 0.010390 |
| Ericales       | Polemoniaceae    | Polemoniaceae                         | <i>Phlox_spp.</i>            | 385  | 4 | 0.010390 |
| Ericales       | Polemoniaceae    | Polemoniaceae                         | <i>Polemonium</i>            | 385  | 4 | 0.010390 |
| Ericales       | Sapotaceae       | Sapotaceae                            | <i>Manilkara_zapota</i>      | 1100 | 1 | 0.000909 |
| Ericales       | Ebenaceae        | Ebenaceae                             | <i>Lissocarpa_benthamii</i>  | 548  | 3 | 0.005474 |
| Ericales       | Ebenaceae        | Ebenaceae                             | <i>Diospyros_spp.</i>        | 548  | 3 | 0.005474 |
| Ericales       | Ebenaceae        | Ebenaceae                             | <i>Euclea_crispa</i>         | 548  | 3 | 0.005474 |
| Ericales       | Primulaceae      | Primulaceae                           | <i>Anagallis_spp.</i>        | 2590 | 5 | 0.001931 |
| Ericales       | (Myrsinaceae)    |                                       |                              |      |   |          |
| Ericales       | Primulaceae      | Primulaceae                           | <i>Maesa</i>                 | 2590 | 5 | 0.001931 |
| Ericales       | Primulaceae      | Primulaceae                           | <i>Clavija</i>               | 2590 | 5 | 0.001931 |
| Ericales       | Primulaceae      | Primulaceae                           | <i>Androsace_spp.</i>        | 2590 | 5 | 0.001931 |
| Ericales       | Primulaceae      | Primulaceae                           | <i>Primula</i>               | 2590 | 5 | 0.001931 |
| Ericales       | Pentaphylacaceae | Pentaphylacaceae plus<br>Sladeniaceae | <i>Eurya_spp.</i>            | 340  | 2 | 0.005882 |
| Ericales       | Pentaphylacaceae | Pentaphylacaceae plus<br>Sladeniaceae | <i>Ternstroemia_spp.</i>     | 340  | 2 | 0.005882 |

|                             |                            |                                   |                                |       |   |          |
|-----------------------------|----------------------------|-----------------------------------|--------------------------------|-------|---|----------|
| Ericales                    | Theaceae                   | Theaceae plus<br>Mitrastemonaceae | <i>Camellia_sinensis</i>       | 462   | 1 | 0.002165 |
| Ericales                    | Symplocaceae               | Symplocaceae                      | <i>Symplocos_spp.</i>          | 320   | 1 | 0.003125 |
| Ericales                    | Diapensiaceae              | Diapensiaceae                     | <i>Galax_spp.</i>              | 18    | 1 | 0.055556 |
| Ericales                    | Styracaceae                | Styracaceae                       | <i>Halesia_spp.</i>            | 160   | 2 | 0.012500 |
| Ericales                    | Styracaceae                | Styracaceae                       | <i>Styrax_spp.</i>             | 160   | 2 | 0.012500 |
| Ericales                    | Sarraceniaceae             | Sarraceniaceae                    | <i>Sarracenia_spp.</i>         | 32    | 1 | 0.031250 |
| Ericales                    | Actinidiaceae              | Actinidiaceae                     | <i>Actinidia_spp.</i>          | 355   | 1 | 0.002817 |
| Ericales                    | Roridulaceae               | Roridulaceae                      | <i>Roridula_gorgonias</i>      | 2     | 1 | 0.500000 |
| Ericales                    | Clethraceae                | Clethraceae                       | <i>Clethra_spp.</i>            | 75    | 1 | 0.013333 |
| Ericales                    | Cyrillaceae                | Cyrillaceae                       | <i>Cyrilla_racemiflora</i>     | 2     | 1 | 0.500000 |
| Ericales                    | Ericaceae                  | Ericaceae                         | <i>Enkianthus_campanulatus</i> | 3995  | 4 | 0.001001 |
| Ericales                    | Ericaceae                  | Ericaceae                         | <i>Arbutus</i>                 | 3995  | 4 | 0.001001 |
| Ericales                    | Ericaceae                  | Ericaceae                         | <i>Rhododendron_spp.</i>       | 3995  | 4 | 0.001001 |
| Ericales                    | Ericaceae                  | Ericaceae                         | <i>Vaccinium_spp.</i>          | 3995  | 4 | 0.001001 |
| unassigned<br>Icacinaceae   | Icacinaceae                | Icacinaceae                       | <i>Icacina</i>                 | 150   | 1 | 0.006667 |
| Garryales                   | Eucommiaceae               | Eucommiaceae                      | <i>Eucommia</i>                | 1     | 1 | 1.000000 |
| Garryales                   | Garryaceae<br>(Aucubaceae) | Garryaceae                        | <i>Aucuba_japonica</i>         | 17    | 2 | 0.117647 |
| Garryales                   | Garryaceae                 | Garryaceae                        | <i>Garrya_elliptica</i>        | 17    | 2 | 0.117647 |
| unassigned<br>Oncothecaceae | Oncothecaceae              | Oncothecaceae                     | <i>Oncotheca</i>               | 2     | 1 | 0.500000 |
| unassigned<br>Vahliaceae    | Vahliaceae                 | Vahliaceae                        | <i>Vahlia_capensis</i>         | 8     | 1 | 0.125000 |
| Solanales                   | Montiniaceae               | Montiniaceae                      | <i>Montinia_caryophyllacea</i> | 5     | 1 | 0.200000 |
| Solanales                   | Hydroleaceae               | Hydroleaceae                      | <i>Hydrolea_ovata</i>          | 12    | 1 | 0.083333 |
| Solanales                   | Sphenocleaceae             | Sphenocleaceae                    | <i>Sphenoclea</i>              | 2     | 1 | 0.500000 |
| Solanales                   | Convolvulaceae             | Convolvulaceae                    | <i>Cuscuta</i>                 | 1625  | 2 | 0.001231 |
| Solanales                   | Convolvulaceae             | Convolvulaceae                    | <i>Ipomoea_spp.</i>            | 1625  | 2 | 0.001231 |
| Solanales                   | Solanaceae                 | Solanaceae                        | <i>Petunia_spp.</i>            | 2460  | 5 | 0.002033 |
| Solanales                   | Solanaceae                 | Solanaceae                        | <i>Atropa</i>                  | 2460  | 5 | 0.002033 |
| Solanales                   | Solanaceae                 | Solanaceae                        | <i>Solanum</i>                 | 2460  | 5 | 0.002033 |
| Solanales                   | Solanaceae                 | Solanaceae                        | <i>Nicotiana_spp.</i>          | 2460  | 5 | 0.002033 |
| Solanales                   | Solanaceae                 | Solanaceae                        | <i>Nolana_spp.</i>             | 2460  | 5 | 0.002033 |
| Gentianales                 | Rubiaceae                  | Rubiaceae                         | <i>Luculia</i>                 | 13150 | 4 | 0.000304 |
| Gentianales                 | Rubiaceae                  | Rubiaceae                         | <i>Coffea_arabica</i>          | 13150 | 4 | 0.000304 |
| Gentianales                 | Rubiaceae                  | Rubiaceae                         | <i>Galium</i>                  | 13150 | 4 | 0.000304 |
| Gentianales                 | Rubiaceae                  | Rubiaceae                         | <i>Mitchella_repens</i>        | 13150 | 4 | 0.000304 |
| Gentianales                 | Loganiaceae                | Loganiaceae                       | <i>Spigelia_spp.</i>           | 420   | 2 | 0.004762 |
| Gentianales                 | Loganiaceae                | Loganiaceae                       | <i>Strychnos</i>               | 420   | 2 | 0.004762 |
| Gentianales                 | Gelsemiaceae               | Gelsemiaceae                      | <i>Gelsemium</i>               | 11    | 1 | 0.090909 |
| Gentianales                 | Apocynaceae                | Apocynaceae                       | <i>Nerium_oleander</i>         | 4555  | 1 | 0.000220 |
| Gentianales                 | Gentianaceae               | Gentianaceae                      | <i>Exacum_affine</i>           | 1675  | 2 | 0.001194 |
| Gentianales                 | Gentianaceae               | Gentianaceae                      | <i>Gentiana_spp.</i>           | 1675  | 2 | 0.001194 |
| Boraginales                 | Boraginaceae               | Boraginaceae                      | <i>Borago_officinalis</i>      | 2755  | 3 | 0.001089 |
| Boraginales                 | Boraginaceae               | Boraginaceae                      | <i>Ehretia</i>                 | 2755  | 3 | 0.001089 |
| Boraginales                 | Boraginaceae               | Boraginaceae                      | <i>Hydrophyllum</i>            | 2755  | 3 | 0.001089 |

|              |                      |                                  |                               |      |   |          |
|--------------|----------------------|----------------------------------|-------------------------------|------|---|----------|
| Lamiales     | Plocospermataceae    | Plocospermataceae                | <i>Plocosperma_buxifolium</i> | 1    | 1 | 1.000000 |
| Lamiales     | Oleaceae             | Oleaceae plus Carlemanniaceae    | <i>Olea_europaea</i>          | 620  | 3 | 0.004839 |
| Lamiales     | Oleaceae             | Oleaceae plus Carlemanniaceae    | <i>Jasminum</i>               | 620  | 3 | 0.004839 |
| Lamiales     | Oleaceae             | Oleaceae plus Carlemanniaceae    | <i>Syringa</i>                | 620  | 3 | 0.004839 |
| Lamiales     | Tetrachondraceae     | Tetrachondraceae                 | <i>Polypremum_procumbens</i>  | 3    | 1 | 0.333333 |
| Lamiales     | unplaced Peltanthera | Peltanthera                      | <i>Peltanthera</i>            | 1    | 1 | 1.000000 |
| Lamiales     | Calceolariaceae      | Calceolariaceae                  | <i>Calceolaria</i>            | 260  | 1 | 0.003846 |
| Lamiales     | Gesneriaceae         | Gesneriaceae                     | <i>Rhynchoglossum_spp.</i>    | 3312 | 2 | 0.000604 |
| Lamiales     | Gesneriaceae         | Gesneriaceae                     | <i>Titanotrichum_oldhamii</i> | 3312 | 2 | 0.000604 |
| Lamiales     | Stilbaceae           | Stilbaceae                       | <i>Halleria</i>               | 39   | 1 | 0.025641 |
| Lamiales     | Plantaginaceae       | Plantaginaceae                   | <i>Antirrhinum</i>            | 1900 | 3 | 0.001579 |
| Lamiales     | Plantaginaceae       | Plantaginaceae                   | <i>Plantago_spp.</i>          | 1900 | 3 | 0.001579 |
| Lamiales     | Plantaginaceae       | Plantaginaceae                   | <i>Veronica_spp.</i>          | 1900 | 3 | 0.001579 |
| Lamiales     | Scrophulariaceae     | Scrophulariaceae                 | <i>Myoporum_mauritianum</i>   | 1800 | 3 | 0.001667 |
| Lamiales     | Scrophulariaceae     | Scrophulariaceae                 | <i>Scrophularia_spp.</i>      | 1800 | 3 | 0.001667 |
| Lamiales     | Scrophulariaceae     | Scrophulariaceae                 | <i>Verbascum_thapsus</i>      | 1800 | 3 | 0.001667 |
| Lamiales     | Bignoniaceae         | Bignoniaceae                     | <i>Campsis_radicans</i>       | 800  | 2 | 0.002500 |
| Lamiales     | Bignoniaceae         | Bignoniaceae                     | <i>Catalpa</i>                | 800  | 2 | 0.002500 |
| Lamiales     | Martyniaceae         | Martyniaceae plus Schlegeliaceae | <i>Martynia</i>               | 44   | 1 | 0.022727 |
| Lamiales     | Pedaliaceae          | Pedaliaceae                      | <i>Sesamum</i>                | 70   | 1 | 0.014286 |
| Lamiales     | Byblidaceae          | Byblidaceae plus Linderniaceae   | <i>Byblis_spp.</i>            | 201  | 1 | 0.004975 |
| Lamiales     | Lentibulariaceae     | Lentibulariaceae                 | <i>Pinguicula</i>             | 330  | 2 | 0.006061 |
| Lamiales     | Lentibulariaceae     | Lentibulariaceae                 | <i>Utricularia_spp.</i>       | 330  | 2 | 0.006061 |
| Lamiales     | Acanthaceae          | Acanthaceae                      | <i>Thunbergia_spp.</i>        | 4000 | 4 | 0.001000 |
| Lamiales     | Acanthaceae          | Acanthaceae                      | <i>Acanthus</i>               | 4000 | 4 | 0.001000 |
| Lamiales     | Acanthaceae          | Acanthaceae                      | <i>Barleria_prionitis</i>     | 4000 | 4 | 0.001000 |
| Lamiales     | Acanthaceae          | Acanthaceae                      | <i>Justicia_americana</i>     | 4000 | 4 | 0.001000 |
| Lamiales     | Thomandersiaceae     | Thomandersiaceae                 | <i>Thomandersia</i>           | 6    | 1 | 0.166667 |
| Lamiales     | Verbenaceae          | Verbenaceae                      | <i>Verbena_spp.</i>           | 918  | 1 | 0.001089 |
| Lamiales     | Lamiaceae            | Lamiaceae                        | <i>Callicarpa_spp.</i>        | 7173 | 2 | 0.000279 |
| Lamiales     | Lamiaceae            | Lamiaceae                        | <i>Lamium_spp.</i>            | 7173 | 2 | 0.000279 |
| Lamiales     | Paulowniaceae        | Paulowniaceae                    | <i>Paulownia_tomentosa</i>    | 8    | 1 | 0.125000 |
| Lamiales     | Orobanchaceae        | Orobanchaceae                    | <i>Pedicularis_spp.</i>       | 2060 | 1 | 0.000485 |
| Lamiales     | Mazaceae             | Mazaceae                         | <i>Mazus_spp.</i>             | 33   | 1 | 0.030303 |
| Lamiales     | Phrymaceae           | Phrymaceae                       | <i>Phryma</i>                 | 188  | 1 | 0.005319 |
| Aquifoliales | Aquifoliaceae        | Aquifoliaceae                    | <i>Ilex_spp.</i>              | 405  | 1 | 0.002469 |



|               |                    |                    |                              |       |   |          |
|---------------|--------------------|--------------------|------------------------------|-------|---|----------|
| Aquifoliales  | Helwingiaceae      | Helwingiaceae      | <i>Helwingia_spp.</i>        | 3     | 1 | 0.333333 |
| Aquifoliales  | Phyllonomaceae     | Phyllonomaceae     | <i>Phyllonoma_spp.</i>       | 4     | 1 | 0.250000 |
| Aquifoliales  | Stemonuraceae      | Stemonuraceae      | <i>Gomphandra</i>            | 95    | 2 | 0.021053 |
| Aquifoliales  | Stemonuraceae      | Stemonuraceae      | <i>Irvingbaileya_spp.</i>    | 95    | 2 | 0.021053 |
| Aquifoliales  | Cardiopteridaceae  | Cardiopteridaceae  | <i>Citronella</i>            | 43    | 3 | 0.069767 |
| Aquifoliales  | Cardiopteridaceae  | Cardiopteridaceae  | <i>Cardiopteris_spp.</i>     | 43    | 3 | 0.069767 |
| Aquifoliales  | Cardiopteridaceae  | Cardiopteridaceae  | <i>Gonocaryum_litorale</i>   | 43    | 3 | 0.069767 |
| Escalloniales | Escalloniaceae     | Escalloniaceae     | <i>Polyosma_spp.</i>         | 130   | 6 | 0.046154 |
| Escalloniales | Escalloniaceae     | Escalloniaceae     | <i>Anopterus</i>             | 130   | 6 | 0.046154 |
| Escalloniales | Escalloniaceae     | Escalloniaceae     | <i>Eremosyne_pectinata</i>   | 130   | 6 | 0.046154 |
| Escalloniales | Escalloniaceae     | Escalloniaceae     | <i>Escallonia_spp.</i>       | 130   | 6 | 0.046154 |
| Escalloniales | Escalloniaceae     | Escalloniaceae     | <i>Forgesia</i>              | 130   | 6 | 0.046154 |
| Escalloniales | Escalloniaceae     | Escalloniaceae     | <i>Valdivia</i>              | 130   | 6 | 0.046154 |
| Asterales     | Pentaphragmataceae | Pentaphragmataceae | <i>Pentaphragma</i>          | 30    | 1 | 0.033333 |
| Asterales     | Rousseaceae        | Rousseaceae        | <i>Roussea_simplex</i>       | 13    | 4 | 0.307692 |
| Asterales     | Rousseaceae        | Rousseaceae        | <i>Carpodetus</i>            | 13    | 4 | 0.307692 |
| Asterales     | Rousseaceae        | Rousseaceae        | <i>Abrophyllum</i>           | 13    | 4 | 0.307692 |
| Asterales     | Rousseaceae        | Rousseaceae        | <i>Cuttsia</i>               | 13    | 4 | 0.307692 |
| Asterales     | Campanulaceae      | Campanulaceae      | <i>Cyphia</i>                | 2380  | 6 | 0.002521 |
| Asterales     | Campanulaceae      | Campanulaceae      | <i>Campanula_spp.</i>        | 2380  | 6 | 0.002521 |
| Asterales     | Campanulaceae      | Campanulaceae      | <i>Trachelium</i>            | 2380  | 6 | 0.002521 |
| Asterales     | Campanulaceae      | Campanulaceae      | <i>Pseudonemacladus</i>      | 2380  | 6 | 0.002521 |
| Asterales     | Campanulaceae      | Campanulaceae      | <i>Dialypetalum</i>          | 2380  | 6 | 0.002521 |
| Asterales     | Campanulaceae      | Campanulaceae      | <i>Lobelia_spp.</i>          | 2380  | 6 | 0.002521 |
| Asterales     | Phellinaceae       | Phellinaceae       | <i>Phelline_spp.</i>         | 12    | 1 | 0.083333 |
| Asterales     | Argophyllaceae     | Argophyllaceae     | <i>Argophyllum</i>           | 21    | 2 | 0.095238 |
| Asterales     | Argophyllaceae     | Argophyllaceae     | <i>Corokia_cotoneaster</i>   | 21    | 2 | 0.095238 |
| Asterales     | Alseuosmiaceae     | Alseuosmiaceae     | <i>Platyspermation</i>       | 10    | 4 | 0.400000 |
| Asterales     | Alseuosmiaceae     | Alseuosmiaceae     | <i>Crispiloba</i>            | 10    | 4 | 0.400000 |
| Asterales     | Alseuosmiaceae     | Alseuosmiaceae     | <i>Alseuosmia</i>            | 10    | 4 | 0.400000 |
| Asterales     | Alseuosmiaceae     | Alseuosmiaceae     | <i>Wittsteinia</i>           | 10    | 4 | 0.400000 |
| Asterales     | Stylidaceae        | Stylidaceae        | <i>Donatia_spp.</i>          | 245   | 3 | 0.012245 |
| Asterales     | Stylidaceae        | Stylidaceae        | <i>Forstera</i>              | 245   | 3 | 0.012245 |
| Asterales     | Stylidaceae        | Stylidaceae        | <i>Stylidium</i>             | 245   | 3 | 0.012245 |
| Asterales     | Menyanthaceae      | Menyanthaceae      | <i>Fauria</i>                | 58    | 4 | 0.068966 |
| Asterales     | Menyanthaceae      | Menyanthaceae      | <i>Menyanthes_trifoliata</i> | 58    | 4 | 0.068966 |
| Asterales     | Menyanthaceae      | Menyanthaceae      | <i>Nymphoides</i>            | 58    | 4 | 0.068966 |
| Asterales     | Menyanthaceae      | Menyanthaceae      | <i>Villarsia</i>             | 58    | 4 | 0.068966 |
| Asterales     | Goodeniaceae       | Goodeniaceae       | <i>Dampiera</i>              | 430   | 3 | 0.006977 |
| Asterales     | Goodeniaceae       | Goodeniaceae       | <i>Goodenia</i>              | 430   | 3 | 0.006977 |
| Asterales     | Goodeniaceae       | Goodeniaceae       | <i>Scaevola_spp.</i>         | 430   | 3 | 0.006977 |
| Asterales     | Calyceraceae       | Calyceraceae       | <i>Boopis_spp.</i>           | 60    | 3 | 0.050000 |
| Asterales     | Calyceraceae       | Calyceraceae       | <i>Acicarpha</i>             | 60    | 3 | 0.050000 |
| Asterales     | Calyceraceae       | Calyceraceae       | <i>Moschopsis</i>            | 60    | 3 | 0.050000 |
| Asterales     | Asteraceae         | Asteraceae         | <i>Barnadesia</i>            | 23600 | 9 | 0.000381 |
| Asterales     | Asteraceae         | Asteraceae         | <i>Gerbera</i>               | 23600 | 9 | 0.000381 |
| Asterales     | Asteraceae         | Asteraceae         | <i>Echinops</i>              | 23600 | 9 | 0.000381 |
| Asterales     | Asteraceae         | Asteraceae         | <i>Tragopogon_dubius</i>     | 23600 | 9 | 0.000381 |
| Asterales     | Asteraceae         | Asteraceae         | <i>Cichorium</i>             | 23600 | 9 | 0.000381 |

|                |                                   |                 |                             |       |    |          |
|----------------|-----------------------------------|-----------------|-----------------------------|-------|----|----------|
| Asterales      | Asteraceae                        | Asteraceae      | <i>Lactuca</i>              | 23600 | 9  | 0.000381 |
| Asterales      | Asteraceae                        | Asteraceae      | <i>Tagetes</i>              | 23600 | 9  | 0.000381 |
| Asterales      | Asteraceae                        | Asteraceae      | <i>Guizotia</i>             | 23600 | 9  | 0.000381 |
| Asterales      | Asteraceae                        | Asteraceae      | <i>Helianthus_annuus</i>    | 23600 | 9  | 0.000381 |
| Bruniales      | Bruniaceae                        | Bruniaceae      | <i>Berzelia_lanuginosa</i>  | 81    | 2  | 0.024691 |
| Bruniales      | Bruniaceae                        | Bruniaceae      | <i>Brunia</i>               | 81    | 2  | 0.024691 |
| Bruniales      | Columelliaceae                    | Columelliaceae  | <i>Columellia</i>           | 5     | 2  | 0.400000 |
| Bruniales      | Columelliaceae                    | Columelliaceae  | <i>Desfontainia_spinosa</i> | 5     | 2  | 0.400000 |
| Paracryphiales | Paracryphiaceae                   | Paracryphiaceae | <i>Quintinia</i>            | 36    | 3  | 0.083333 |
| Paracryphiales | Paracryphiaceae                   | Paracryphiaceae | <i>Paracryphia_alticola</i> | 36    | 3  | 0.083333 |
| Paracryphiales | Paracryphiaceae                   | Paracryphiaceae | <i>Sphenostemon</i>         | 36    | 3  | 0.083333 |
| Dipsacales     | Adoxaceae                         | Adoxaceae       | <i>Viburnum_spp.</i>        | 200   | 5  | 0.025000 |
| Dipsacales     | Adoxaceae                         | Adoxaceae       | <i>Sambucus</i>             | 200   | 5  | 0.025000 |
| Dipsacales     | Adoxaceae                         | Adoxaceae       | <i>Sinadoxa</i>             | 200   | 5  | 0.025000 |
| Dipsacales     | Adoxaceae                         | Adoxaceae       | <i>Adoxa_moschatellina</i>  | 200   | 5  | 0.025000 |
| Dipsacales     | Adoxaceae                         | Adoxaceae       | <i>Tetradoxa</i>            | 200   | 5  | 0.025000 |
| Dipsacales     | Caprifoliaceae<br>(Diervillaceae) | Caprifoliaceae  | <i>Diervilla</i>            | 890   | 22 | 0.024719 |
| Dipsacales     | Caprifoliaceae<br>(Diervillaceae) | Caprifoliaceae  | <i>Weigela</i>              | 890   | 22 | 0.024719 |
| Dipsacales     | Caprifoliaceae                    | Caprifoliaceae  | <i>Heptacodium</i>          | 890   | 22 | 0.024719 |
| Dipsacales     | Caprifoliaceae                    | Caprifoliaceae  | <i>Lonicera</i>             | 890   | 22 | 0.024719 |
| Dipsacales     | Caprifoliaceae                    | Caprifoliaceae  | <i>Symphoricarpos</i>       | 890   | 22 | 0.024719 |
| Dipsacales     | Caprifoliaceae                    | Caprifoliaceae  | <i>Leycesteria</i>          | 890   | 22 | 0.024719 |
| Dipsacales     | Caprifoliaceae                    | Caprifoliaceae  | <i>Triosteum</i>            | 890   | 22 | 0.024719 |
| Dipsacales     | Caprifoliaceae<br>(Linnaeaceae)   | Caprifoliaceae  | <i>Linnaea</i>              | 890   | 22 | 0.024719 |
| Dipsacales     | Caprifoliaceae<br>(Linnaeaceae)   | Caprifoliaceae  | <i>Abelia_spp.</i>          | 890   | 22 | 0.024719 |
| Dipsacales     | Caprifoliaceae<br>(Linnaeaceae)   | Caprifoliaceae  | <i>Dipelta</i>              | 890   | 22 | 0.024719 |
| Dipsacales     | Caprifoliaceae<br>(Linnaeaceae)   | Caprifoliaceae  | <i>Kolkwitzia</i>           | 890   | 22 | 0.024719 |
| Dipsacales     | Caprifoliaceae<br>(Morinaceae)    | Caprifoliaceae  | <i>Morina</i>               | 890   | 22 | 0.024719 |
| Dipsacales     | Caprifoliaceae<br>(Morinaceae)    | Caprifoliaceae  | <i>Zabelia</i>              | 890   | 22 | 0.024719 |
| Dipsacales     | Caprifoliaceae<br>(Dipsacaceae)   | Caprifoliaceae  | <i>Triplostegia</i>         | 890   | 22 | 0.024719 |
| Dipsacales     | Caprifoliaceae<br>(Dipsacaceae)   | Caprifoliaceae  | <i>Scabiosa_spp.</i>        | 890   | 22 | 0.024719 |
| Dipsacales     | Caprifoliaceae<br>(Dipsacaceae)   | Caprifoliaceae  | <i>Dipsacus_spp.</i>        | 890   | 22 | 0.024719 |
| Dipsacales     | Caprifoliaceae<br>(Dipsacaceae)   | Caprifoliaceae  | <i>Pterocephalodes</i>      | 890   | 22 | 0.024719 |
| Dipsacales     | Caprifoliaceae<br>(Valerianaceae) | Caprifoliaceae  | <i>Patrinia</i>             | 890   | 22 | 0.024719 |
| Dipsacales     | Caprifoliaceae<br>(Valerianaceae) | Caprifoliaceae  | <i>Nardostachys</i>         | 890   | 22 | 0.024719 |

|              |                                   |                   |                                      |      |    |          |
|--------------|-----------------------------------|-------------------|--------------------------------------|------|----|----------|
| Dipsacales   | Caprifoliaceae<br>(Valerianaceae) | Caprifoliaceae    | <i>Valerianella</i>                  | 890  | 22 | 0.024719 |
| Dipsacales   | Caprifoliaceae<br>(Valerianaceae) | Caprifoliaceae    | <i>Centranthus</i>                   | 890  | 22 | 0.024719 |
| Dipsacales   | Caprifoliaceae<br>(Valerianaceae) | Caprifoliaceae    | <i>Valeriana_spp.</i>                | 890  | 22 | 0.024719 |
| Apiales      | Pennantiaceae                     | Pennantiaceae     | <i>Pennantia_corymbosa</i>           | 4    | 1  | 0.250000 |
| Apiales      | Torricelliaceae                   | Torricelliaceae   | <i>Aralidium</i>                     | 10   | 3  | 0.300000 |
| Apiales      | Torricelliaceae                   | Torricelliaceae   | <i>Melanophylla_spp.</i>             | 10   | 3  | 0.300000 |
| Apiales      | Torricelliaceae                   | Torricelliaceae   | <i>Torricellia</i>                   | 10   | 3  | 0.300000 |
| Apiales      | Griselinaceae                     | Griselinaceae     | <i>Griselinia_spp.</i>               | 6    | 1  | 0.166667 |
| Apiales      | Pittosporaceae                    | Pittosporaceae    | <i>Pittosporum</i>                   | 200  | 2  | 0.010000 |
| Apiales      | Pittosporaceae                    | Pittosporaceae    | <i>Sollya_heterophylla</i>           | 200  | 2  | 0.010000 |
| Apiales      | Araliaceae                        | Arailaceae        | <i>Hydrocotyle</i>                   | 1450 | 10 | 0.006897 |
| Apiales      | Araliaceae                        | Arailaceae        | <i>Aralia</i>                        | 1450 | 10 | 0.006897 |
| Apiales      | Araliaceae                        | Arailaceae        | <i>Panax_spp.</i>                    | 1450 | 10 | 0.006897 |
| Apiales      | Araliaceae                        | Arailaceae        | <i>Cussonia</i>                      | 1450 | 10 | 0.006897 |
| Apiales      | Araliaceae                        | Arailaceae        | <i>Pseudopanax</i>                   | 1450 | 10 | 0.006897 |
| Apiales      | Araliaceae                        | Arailaceae        | <i>Tetraplasandra</i>                | 1450 | 10 | 0.006897 |
| Apiales      | Araliaceae                        | Arailaceae        | <i>Polyscias</i>                     | 1450 | 10 | 0.006897 |
| Apiales      | Araliaceae                        | Arailaceae        | <i>Hedera_helix</i>                  | 1450 | 10 | 0.006897 |
| Apiales      | Araliaceae                        | Arailaceae        | <i>Schefflera</i>                    | 1450 | 10 | 0.006897 |
| Apiales      | Araliaceae                        | Arailaceae        | <i>Tetrapanax</i>                    | 1450 | 10 | 0.006897 |
| Apiales      | Myodocarpaceae                    | Myodocarpaceae    | <i>Delarbrea_michieana</i>           | 19   | 2  | 0.105263 |
| Apiales      | Myodocarpaceae                    | Myodocarpaceae    | <i>Myodocarpus</i>                   | 19   | 2  | 0.105263 |
| Apiales      | Apiaceae                          | Apiaceae          | <i>Mackinlaya</i>                    | 3780 | 11 | 0.002910 |
| Apiales      | Apiaceae                          | Apiaceae          | <i>Platysace</i>                     | 3780 | 11 | 0.002910 |
| Apiales      | Apiaceae                          | Apiaceae          | <i>Azorella</i>                      | 3780 | 11 | 0.002910 |
| Apiales      | Apiaceae                          | Apiaceae          | <i>Arctopus</i>                      | 3780 | 11 | 0.002910 |
| Apiales      | Apiaceae                          | Apiaceae          | <i>Sanicula</i>                      | 3780 | 11 | 0.002910 |
| Apiales      | Apiaceae                          | Apiaceae          | <i>Heteromorpha</i>                  | 3780 | 11 | 0.002910 |
| Apiales      | Apiaceae                          | Apiaceae          | <i>Daucus</i>                        | 3780 | 11 | 0.002910 |
| Apiales      | Apiaceae                          | Apiaceae          | <i>Anethum</i>                       | 3780 | 11 | 0.002910 |
| Apiales      | Apiaceae                          | Apiaceae          | <i>Apium_graveolens</i>              | 3780 | 11 | 0.002910 |
| Apiales      | Apiaceae                          | Apiaceae          | <i>Angelica</i>                      | 3780 | 11 | 0.002910 |
| Apiales      | Apiaceae                          | Apiaceae          | <i>Coriandrum</i>                    | 3780 | 11 | 0.002910 |
| Saxifragales | Peridiscaceae                     | Peridiscaceae     | <i>Peridiscus_lucidus</i>            | 11   | 2  | 0.181818 |
| Saxifragales | Peridiscaceae                     | Peridiscaceae     | <i>Soyauxia_spp.</i>                 | 11   | 2  | 0.181818 |
| Saxifragales | Paeoniaceae                       | Paeoniaceae       | <i>Paeonia_californica</i>           | 33   | 1  | 0.030303 |
| Saxifragales | Altingiaceae                      | Altingiaceae      | <i>Altingia_spp.</i>                 | 13   | 2  | 0.153846 |
| Saxifragales | Altingiaceae                      | Altingiaceae      | <i>Liquidambar_styracifl<br/>ua</i>  | 13   | 2  | 0.153846 |
| Saxifragales | Cercidiphyllaceae                 | Cercidiphyllaceae | <i>Cercidiphyllum_japoni<br/>cum</i> | 2    | 1  | 0.500000 |
| Saxifragales | Daphniphyllaceae                  | Daphniphyllaceae  | <i>Daphniphyllum_spp.</i>            | 10   | 1  | 0.100000 |
| Saxifragales | Hamamelidaceae                    | Hamamelidaceae    | <i>Exbucklandia_populne<br/>a</i>    | 82   | 5  | 0.060976 |
| Saxifragales | Hamamelidaceae                    | Hamamelidaceae    | <i>Rhodoleia_spp.</i>                | 82   | 5  | 0.060976 |

|              |                  |                             |                                  |      |   |          |
|--------------|------------------|-----------------------------|----------------------------------|------|---|----------|
| Saxifragales | Hamamelidaceae   | Hamamelidaceae              | <i>Disanthus_cercidifolius</i>   | 82   | 5 | 0.060976 |
| Saxifragales | Hamamelidaceae   | Hamamelidaceae              | <i>Corylopsis_spp.</i>           | 82   | 5 | 0.060976 |
| Saxifragales | Hamamelidaceae   | Hamamelidaceae              | <i>Hamamelis_spp.</i>            | 82   | 5 | 0.060976 |
| Saxifragales | Pterostemonaceae | Pterostemonaceae            | <i>Pterostemon_rotundifolius</i> | 3    | 1 | 0.333333 |
| Saxifragales | Iteaceae         | Iteaceae                    | <i>Choristylis</i>               | 18   | 2 | 0.111111 |
| Saxifragales | Iteaceae         | Iteaceae                    | <i>Itea</i>                      | 18   | 2 | 0.111111 |
| Saxifragales | Grossulariaceae  | Grossulariaceae             | <i>Ribes_aureum</i>              | 150  | 1 | 0.006667 |
| Saxifragales | Saxifragaceae    | Saxifragaceae               | <i>Saxifraga</i>                 | 540  | 3 | 0.005556 |
| Saxifragales | Saxifragaceae    | Saxifragaceae               | <i>Heuchera_spp.</i>             | 540  | 3 | 0.005556 |
| Saxifragales | Saxifragaceae    | Saxifragaceae               | <i>Sullivantia_oregana</i>       | 540  | 3 | 0.005556 |
| Saxifragales | Crassulaceae     | Crassulaceae                | <i>Crassula_marnierana</i>       | 1400 | 4 | 0.002857 |
| Saxifragales | Crassulaceae     | Crassulaceae                | <i>Kalanchoe</i>                 | 1400 | 4 | 0.002857 |
| Saxifragales | Crassulaceae     | Crassulaceae                | <i>Dudleya_viscida</i>           | 1400 | 4 | 0.002857 |
| Saxifragales | Crassulaceae     | Crassulaceae                | <i>Sedum_spp.</i>                | 1400 | 4 | 0.002857 |
| Saxifragales | Aphanopetalaceae | Aphanopetalaceae            | <i>Aphanopetalum_resinosum</i>   | 2    | 1 | 0.500000 |
| Saxifragales | Tetracarpaeaceae | Tetracarpaeaceae            | <i>Tetracarpaea_tasmanica</i>    | 1    | 1 | 1.000000 |
| Saxifragales | Penthoraceae     | Penthoraceae                | <i>Penthorum_sedoides</i>        | 2    | 1 | 0.500000 |
| Saxifragales | Haloragaceae     | Haloragaceae                | <i>Haloragis_spp.</i>            | 145  | 2 | 0.013793 |
| Saxifragales | Haloragaceae     | Haloragaceae                | <i>Myriophyllum</i>              | 145  | 2 | 0.013793 |
| Vitales      | Vitaceae         | Vitaceae                    | <i>Leea_guineensis</i>           | 850  | 2 | 0.002353 |
| Vitales      | Vitaceae         | Vitaceae                    | <i>Vitis_spp.</i>                | 850  | 2 | 0.002353 |
| Geraniales   | Geraniaceae      | Geraniaceae                 | <i>Geranium_spp.</i>             | 805  | 2 | 0.002484 |
| Geraniales   | Geraniaceae      | Geraniaceae                 | <i>Pelargonium_cotyledonis</i>   | 805  | 2 | 0.002484 |
| Geraniales   | Vivianiaceae     | Vivianiaceae                | <i>Viviania_marifolia</i>        | 18   | 1 | 0.055556 |
| Geraniales   | Greyiaceae       | Greyiaceae plus Francoaceae | <i>Greyia_radlkoferi</i>         | 5    | 1 | 0.200000 |
| Geraniales   | Melianthaceae    | Melianthaceae               | <i>Melianthus</i>                | 8    | 1 | 0.125000 |
| Myrtales     | Combretaceae     | Combretaceae                | <i>Terminalia_spp.</i>           | 500  | 1 | 0.002000 |
| Myrtales     | Lythraceae       | Lythraceae                  | <i>Lythrum_spp.</i>              | 620  | 1 | 0.001613 |
| Myrtales     | Onagraceae       | Onagraceae                  | <i>Fuchsia_procumbens</i>        | 656  | 3 | 0.004573 |
| Myrtales     | Onagraceae       | Onagraceae                  | <i>Clarkia_xantiana</i>          | 656  | 3 | 0.004573 |
| Myrtales     | Onagraceae       | Onagraceae                  | <i>Oenothera</i>                 | 656  | 3 | 0.004573 |
| Myrtales     | Melastomataceae  | Melastomataceae             | <i>Clidemia_spp.</i>             | 5005 | 2 | 0.000400 |
| Myrtales     | Melastomataceae  | Melastomataceae             | <i>Mouriri_cyphocarpa</i>        | 5005 | 2 | 0.000400 |
| Myrtales     | Crypteroniaceae  | Crypteroniaceae             | <i>Crypteronia_paniculata</i>    | 10   | 1 | 0.100000 |
| Myrtales     | Penaeaceae       | Penaeaceae plus Alzateaceae | <i>Olinia</i>                    | 31   | 1 | 0.032258 |
| Myrtales     | Vochysiaceae     | Vochysiaceae                | <i>Qualea</i>                    | 190  | 2 | 0.010526 |
| Myrtales     | Vochysiaceae     | Vochysiaceae                | <i>Vochysia_spp.</i>             | 190  | 2 | 0.010526 |
| Myrtales     | Myrtaceae        | Myrtaceae                   | <i>Heteropyxis_natalensis</i>    | 4620 | 4 | 0.000866 |
| Myrtales     | Myrtaceae        | Myrtaceae                   | <i>Metrosideros_spp.</i>         | 4620 | 4 | 0.000866 |
| Myrtales     | Myrtaceae        | Myrtaceae                   | <i>Eucalyptus</i>                | 4620 | 4 | 0.000866 |

|                 |                   |                                              |                                  |      |   |          |
|-----------------|-------------------|----------------------------------------------|----------------------------------|------|---|----------|
| Myrtales        | Myrtaceae         | Myrtaceae                                    | <i>Myrtus</i>                    | 4620 | 4 | 0.000866 |
| Crossosomatales | Aphloiaceae       | Aphloiaceae                                  | <i>Aphloia_theiformis</i>        | 1    | 1 | 1.000000 |
| Crossosomatales | Geissolomataceae  | Geissolomataceae                             | <i>Geissoloma_marginatum</i>     | 1    | 1 | 1.000000 |
| Crossosomatales | Ixerbaceae        | Ixerbaceae                                   | <i>Ixerba</i>                    | 1    | 1 | 1.000000 |
| Crossosomatales | Strasburgeriaceae | Strasburgeriaceae                            | <i>Strasburgeria_spp.</i>        | 2    | 1 | 0.500000 |
| Crossosomatales | Staphyleaceae     | Staphyleaceae                                | <i>Staphylea_spp.</i>            | 45   | 1 | 0.022222 |
| Crossosomatales | Guamatelaceae     | Guamatelaceae                                | <i>Guamatela_tuerckheimii</i>    | 1    | 1 | 1.000000 |
| Crossosomatales | Crossosomataceae  | Crossosomataceae                             | <i>Crossosoma_spp.</i>           | 12   | 1 | 0.083333 |
| Crossosomatales | Stachyuraceae     | Stachyuraceae                                | <i>Stachyurus</i>                | 5    | 1 | 0.200000 |
| Picramniales    | Picramniaceae     | Picramniaceae                                | <i>Picramnia_spp.</i>            | 49   | 1 | 0.020408 |
| Sapindales      | Biebersteiniaceae | Biebersteiniaceae                            | <i>Biebersteinia_orphanidis</i>  | 5    | 1 | 0.200000 |
| Sapindales      | Nitrariaceae      | Nitrariaceae                                 | <i>Nitraria</i>                  | 16   | 1 | 0.062500 |
| Sapindales      | Burseraceae       | Burseraceae plus Kirkiaceae                  | <i>Bursera_inaguensis</i>        | 763  | 1 | 0.001311 |
| Sapindales      | Anacardiaceae     | Anacardiaceae                                | <i>Rhus_spp.</i>                 | 873  | 2 | 0.002291 |
| Sapindales      | Anacardiaceae     | Anacardiaceae                                | <i>Schinus</i>                   | 873  | 2 | 0.002291 |
| Sapindales      | Sapindaceae       | Sapindaceae                                  | <i>Aesculus_spp.</i>             | 1630 | 2 | 0.001227 |
| Sapindales      | Sapindaceae       | Sapindaceae                                  | <i>Cupaniopsis_anacardioides</i> | 1630 | 2 | 0.001227 |
| Sapindales      | Simaroubaceae     | Simaroubaceae                                | <i>Ailanthus_altissima</i>       | 110  | 1 | 0.009091 |
| Sapindales      | Rutaceae          | Rutaceae                                     | <i>Citrus_spp.</i>               | 2070 | 1 | 0.000483 |
| Sapindales      | Meliaceae         | Meliaceae                                    | <i>Swietenia_macrophylla</i>     | 615  | 2 | 0.003252 |
| Sapindales      | Meliaceae         | Meliaceae                                    | <i>Trichilia_emetica</i>         | 615  | 2 | 0.003252 |
| Huerteales      | Gerrardiaceae     | Gerrardiaceae plus Petenaceae                | <i>Gerrardina_foliosa</i>        | 3    | 1 | 0.333333 |
| Huerteales      | Tapisciaceae      | Tapisciaceae                                 | <i>Tapiscia_sinensis</i>         | 5    | 1 | 0.200000 |
| Huerteales      | Dipentodontaceae  | Dipentodontaceae                             | <i>Dipentodon</i>                | 16   | 2 | 0.125000 |
| Huerteales      | Dipentodontaceae  | Dipentodontaceae                             | <i>Perrottetia_ovata</i>         | 16   | 2 | 0.125000 |
| Malvales        | Neuradaceae       | Neuradaceae                                  | <i>Neurada_procumbens</i>        | 10   | 1 | 0.100000 |
| Malvales        | Bixaceae          | Bixaceae plus Sphaerosepalaceae              | <i>Bixa</i>                      | 39   | 1 | 0.025641 |
| Malvales        | Dipterocarpaceae  | Dipterocarpaceae plus Sarcolaenaceae         | <i>Anisoptera_marginata</i>      | 740  | 1 | 0.001351 |
| Malvales        | Cistaceae         | Cistaceae plus Cytinaceae plus Muntingiaceae | <i>Helianthemum</i>              | 188  | 1 | 0.005319 |
| Malvales        | Thymelaeaceae     | Thymelaeaceae                                | <i>Thymelaea_hirsuta</i>         | 891  | 1 | 0.001122 |
| Malvales        | Malvaceae         | Malvaceae                                    | <i>Bombax_spp.</i>               | 4225 | 5 | 0.001183 |
| Malvales        | Malvaceae         | Malvaceae                                    | <i>Ochroma_pyramidale</i>        | 4225 | 5 | 0.001183 |

|               |                        |                                                |                                       |       |    |          |
|---------------|------------------------|------------------------------------------------|---------------------------------------|-------|----|----------|
| Malvales      | Malvaceae              | Malvaceae                                      | <i>Durio_zibethinus</i>               | 4225  | 5  | 0.001183 |
| Malvales      | Malvaceae              | Malvaceae                                      | <i>Gossypium</i>                      | 4225  | 5  | 0.001183 |
| Malvales      | Malvaceae              | Malvaceae                                      | <i>Sterculia_spp.</i>                 | 4225  | 5  | 0.001183 |
| Brassicales   | Caricaceae             | Caricaceae plus<br>Moringaceae                 | <i>Carica_papaya</i>                  | 46    | 1  | 0.021739 |
| Brassicales   | Tropaeolaceae          | Tropaeolaceae<br>plus Akaniaceae               | <i>Tropaeolum_spp.</i>                | 107   | 1  | 0.009346 |
| Brassicales   | Limnanthaceae          | Limnanthaceae<br>plus<br>Setchellanthace<br>ae | <i>Floerkea_proserpinaco<br/>ides</i> | 9     | 1  | 0.111111 |
| Brassicales   | Bataceae               | Bataceae plus<br>Salvadoraceae                 | <i>Batis_maritima</i>                 | 13    | 1  | 0.076923 |
| Brassicales   | Koerberliniaceae       | Koerberliniaceae                               | <i>Koerberlinia_spinosa</i>           | 2     | 1  | 0.500000 |
| Brassicales   | Gyrostemonace<br>ae    | Gyrostemonace<br>ae                            | <i>Gyrostemon_spp.</i>                | 18    | 1  | 0.055556 |
| Brassicales   | Resedaceae             | Resedaceae                                     | <i>Reseda</i>                         | 75    | 1  | 0.013333 |
| Brassicales   | Tovariaceae            | Tovariaceae                                    | <i>Tovaria_pendula</i>                | 2     | 1  | 0.500000 |
| Brassicales   | Pentadiplandr<br>aceae | Pentadiplandr<br>aceae plus<br>Emblingiaceae   | <i>Pentadiplandra_brazz<br/>eana</i>  | 2     | 1  | 0.500000 |
| Brassicales   | Capparaceae            | Capparaceae                                    | <i>Capparis_spp.</i>                  | 480   | 1  | 0.002083 |
| Brassicales   | Brassicaceae           | Brassicaceae<br>plus Cleomaceae                | <i>Arabidopsis_thaliana</i>           | 4010  | 3  | 0.000748 |
| Brassicales   | Brassicaceae           | Brassicaceae<br>plus Cleomaceae                | <i>Brassica_spp.</i>                  | 4010  | 3  | 0.000748 |
| Brassicales   | Brassicaceae           | Brassicaceae<br>plus Cleomaceae                | <i>Raphanus_sativus</i>               | 4010  | 3  | 0.000748 |
| Zygophyllales | Krameriaceae           | Krameriaceae                                   | <i>Krameria_ixine</i>                 | 18    | 1  | 0.055556 |
| Zygophyllales | Zygophyllaceae         | Zygophyllaceae                                 | <i>Guaiacum</i>                       | 285   | 2  | 0.007018 |
| Zygophyllales | Zygophyllaceae         | Zygophyllaceae                                 | <i>Larrea_tridentata</i>              | 285   | 2  | 0.007018 |
| Fabales       | Quillajaceae           | Quillajaceae                                   | <i>Quillaja_saponaria</i>             | 3     | 1  | 0.333333 |
| Fabales       | Polygalaceae           | Polygalaceae                                   | <i>Polygala_spp.</i>                  | 965   | 1  | 0.001036 |
| Fabales       | Surianaceae            | Surianaceae                                    | <i>Stylobasium_spathulat<br/>um</i>   | 8     | 1  | 0.125000 |
| Fabales       | Fabaceae               | Fabaceae                                       | <i>Schotia_spp.</i>                   | 19500 | 15 | 0.000769 |
| Fabales       | Fabaceae               | Fabaceae                                       | <i>Bauhinia_spp.</i>                  | 19500 | 15 | 0.000769 |
| Fabales       | Fabaceae               | Fabaceae                                       | <i>Cercis_canadensis</i>              | 19500 | 15 | 0.000769 |
| Fabales       | Fabaceae               | Fabaceae                                       | <i>Ceratonia_siliqua</i>              | 19500 | 15 | 0.000769 |
| Fabales       | Fabaceae               | Fabaceae                                       | <i>Acacia_spp.</i>                    | 19500 | 15 | 0.000769 |
| Fabales       | Fabaceae               | Fabaceae                                       | <i>Albizia_julibrissin</i>            | 19500 | 15 | 0.000769 |
| Fabales       | Fabaceae               | Fabaceae                                       | <i>Mimosa_spp.</i>                    | 19500 | 15 | 0.000769 |
| Fabales       | Fabaceae               | Fabaceae                                       | <i>Indigofera_spp.</i>                | 19500 | 15 | 0.000769 |
| Fabales       | Fabaceae               | Fabaceae                                       | <i>Erythrina_spp.</i>                 | 19500 | 15 | 0.000769 |
| Fabales       | Fabaceae               | Fabaceae                                       | <i>Glycine_max</i>                    | 19500 | 15 | 0.000769 |
| Fabales       | Fabaceae               | Fabaceae                                       | <i>Lotus</i>                          | 19500 | 15 | 0.000769 |
| Fabales       | Fabaceae               | Fabaceae                                       | <i>Astragalus_membrana<br/>ceus</i>   | 19500 | 15 | 0.000769 |
| Fabales       | Fabaceae               | Fabaceae                                       | <i>Cicer</i>                          | 19500 | 15 | 0.000769 |
| Fabales       | Fabaceae               | Fabaceae                                       | <i>Medicago_spp.</i>                  | 19500 | 15 | 0.000769 |
| Fabales       | Fabaceae               | Fabaceae                                       | <i>Pisum</i>                          | 19500 | 15 | 0.000769 |
| Rosales       | Rosaceae               | Rosaceae                                       | <i>Spiraea_spp.</i>                   | 2520  | 3  | 0.001190 |
| Rosales       | Rosaceae               | Rosaceae                                       | <i>Photinia_spp.</i>                  | 2520  | 3  | 0.001190 |

|              |                                 |                                          |                                |      |    |          |
|--------------|---------------------------------|------------------------------------------|--------------------------------|------|----|----------|
| Rosales      | Rosaceae                        | Rosaceae                                 | <i>Prunus_persica</i>          | 2520 | 3  | 0.001190 |
| Rosales      | Dirachmaceae                    | Dirachmaceae                             | <i>Dirachma_socotrana</i>      | 2    | 1  | 0.500000 |
| Rosales      | Elaeagnaceae                    | Elaeagnaceae                             | <i>Elaeagnus_spp.</i>          | 45   | 1  | 0.022222 |
| Rosales      | Barbeyaceae                     | Barbeyaceae                              | <i>Barbeya_oleoides</i>        | 1    | 1  | 1.000000 |
| Rosales      | Rhamnaceae                      | Rhamnaceae                               | <i>Ceanothus_spp.</i>          | 925  | 2  | 0.002162 |
| Rosales      | Rhamnaceae                      | Rhamnaceae                               | <i>Rhamnus</i>                 | 925  | 2  | 0.002162 |
| Rosales      | Ulmaceae                        | Ulmaceae                                 | <i>Zelkova_spp.</i>            | 35   | 1  | 0.028571 |
| Rosales      | Cannabaceae                     | Cannabaceae                              | <i>Celtis_spp.</i>             | 170  | 3  | 0.017647 |
| Rosales      | Cannabaceae                     | Cannabaceae                              | <i>Cannabis</i>                | 170  | 3  | 0.017647 |
| Rosales      | Cannabaceae                     | Cannabaceae                              | <i>Humulus_lupulus</i>         | 170  | 3  | 0.017647 |
| Rosales      | Moraceae                        | Moraceae                                 | <i>Ficus_spp.</i>              | 1125 | 2  | 0.001778 |
| Rosales      | Moraceae                        | Moraceae                                 | <i>Morus_spp.</i>              | 1125 | 2  | 0.001778 |
| Rosales      | Urticaceae                      | Urticaceae                               | <i>Pilea_spp.</i>              | 2625 | 3  | 0.001143 |
| Rosales      | Urticaceae                      | Urticaceae                               | <i>Boehmeria_spp.</i>          | 2625 | 3  | 0.001143 |
| Rosales      | Urticaceae                      | Urticaceae                               | <i>Urtica</i>                  | 2625 | 3  | 0.001143 |
| Fagales      | Nothofagaceae                   | Nothofagaceae                            | <i>Nothofagus_antarctica</i>   | 35   | 1  | 0.028571 |
| Fagales      | Fagaceae                        | Fagaceae                                 | <i>Fagus_spp.</i>              | 670  | 3  | 0.004478 |
| Fagales      | Fagaceae                        | Fagaceae                                 | <i>Chrysolepis_spp.</i>        | 670  | 3  | 0.004478 |
| Fagales      | Fagaceae                        | Fagaceae                                 | <i>Quercus_spp.</i>            | 670  | 3  | 0.004478 |
| Fagales      | Betulaceae                      | Betulaceae plus<br>Ticodendraceae        | <i>Alnus</i>                   | 146  | 1  | 0.006849 |
| Fagales      | Casuarinaceae                   | Casuarinaceae                            | <i>Casuarina</i>               | 95   | 1  | 0.010526 |
| Fagales      | Juglandaceae                    | Juglandaceae                             | <i>Juglans_spp.</i>            | 50   | 1  | 0.020000 |
| Fagales      | Myricaceae                      | Myricaceae plus<br>Rhoipteleaceae        | <i>Morella_cerifera</i>        | 58   | 2  | 0.034483 |
| Fagales      | Myricaceae                      | Myricaceae plus<br>Rhoipteleaceae        | <i>Myrica</i>                  | 58   | 2  | 0.034483 |
| Cucurbitales | Anisophylleaceae                | Anisophylleaceae                         | <i>Anisophyllea_fallax</i>     | 34   | 1  | 0.029412 |
| Cucurbitales | Coriariaceae                    | Coriariaceae                             | <i>Coriaria_ruscifolia</i>     | 5    | 1  | 0.200000 |
| Cucurbitales | Corynocarpaceae                 | Corynocarpaceae                          | <i>Corynocarpus_laevigatus</i> | 6    | 1  | 0.166667 |
| Cucurbitales | Tetramelaceae                   | Tetramelaceae                            | <i>Tetrameles_nudiflora</i>    | 2    | 1  | 0.500000 |
| Cucurbitales | Begoniaceae                     | Begoniaceae                              | <i>Begonia_spp.</i>            | 1501 | 1  | 0.000666 |
| Cucurbitales | Datisceae                       | Datisceae                                | <i>Datisca_spp.</i>            | 2    | 1  | 0.500000 |
| Cucurbitales | Cucurbitaceae                   | Cucurbitaceae                            | <i>Xerosicyos_danguyi</i>      | 960  | 5  | 0.005208 |
| Cucurbitales | Cucurbitaceae                   | Cucurbitaceae                            | <i>Dendrosicyos_socotranus</i> | 960  | 5  | 0.005208 |
| Cucurbitales | Cucurbitaceae                   | Cucurbitaceae                            | <i>Cucurbita</i>               | 960  | 5  | 0.005208 |
| Cucurbitales | Cucurbitaceae                   | Cucurbitaceae                            | <i>Coccinia_sessilifolia</i>   | 960  | 5  | 0.005208 |
| Cucurbitales | Cucurbitaceae                   | Cucurbitaceae                            | <i>Cucumis</i>                 | 960  | 5  | 0.005208 |
| Celastrales  | Lepidobotryaceae                | Lepidobotryaceae                         | <i>Lepidobotrys</i>            | 3    | 2  | 0.666667 |
| Celastrales  | Lepidobotryaceae                | Lepidobotryaceae                         | <i>Ruptiliocarpon</i>          | 3    | 2  | 0.666667 |
| Celastrales  | Celastraceae<br>(Parnassiaceae) | Celastraceae<br>(incl.<br>Parnassiaceae) | <i>Parnassia_spp.</i>          | 1400 | 12 | 0.008571 |
| Celastrales  | Celastraceae                    | Celastraceae<br>(incl.<br>Parnassiaceae) | <i>Siphonodon_spp.</i>         | 1400 | 12 | 0.008571 |

|              |                |                                          |                                  |      |    |          |
|--------------|----------------|------------------------------------------|----------------------------------|------|----|----------|
| Celastrales  | Celastraceae   | Celastraceae<br>(incl.<br>Parnassiaceae) | <i>Denhamia</i>                  | 1400 | 12 | 0.008571 |
| Celastrales  | Celastraceae   | Celastraceae<br>(incl.<br>Parnassiaceae) | <i>Stackhousia_spp.</i>          | 1400 | 12 | 0.008571 |
| Celastrales  | Celastraceae   | Celastraceae<br>(incl.<br>Parnassiaceae) | <i>Maytenus</i>                  | 1400 | 12 | 0.008571 |
| Celastrales  | Celastraceae   | Celastraceae<br>(incl.<br>Parnassiaceae) | <i>Plagiopteron</i>              | 1400 | 12 | 0.008571 |
| Celastrales  | Celastraceae   | Celastraceae<br>(incl.<br>Parnassiaceae) | <i>Brexia_madagascariensis</i>   | 1400 | 12 | 0.008571 |
| Celastrales  | Celastraceae   | Celastraceae<br>(incl.<br>Parnassiaceae) | <i>Elaeodendron</i>              | 1400 | 12 | 0.008571 |
| Celastrales  | Celastraceae   | Celastraceae<br>(incl.<br>Parnassiaceae) | <i>Celastrus</i>                 | 1400 | 12 | 0.008571 |
| Celastrales  | Celastraceae   | Celastraceae<br>(incl.<br>Parnassiaceae) | <i>Tripterygium</i>              | 1400 | 12 | 0.008571 |
| Celastrales  | Celastraceae   | Celastraceae<br>(incl.<br>Parnassiaceae) | <i>Euonymus</i>                  | 1400 | 12 | 0.008571 |
| Celastrales  | Celastraceae   | Celastraceae<br>(incl.<br>Parnassiaceae) | <i>Paxistima</i>                 | 1400 | 12 | 0.008571 |
| Oxalidales   | Huaceae        | Huaceae                                  | <i>Afrostryrax_lepidophyllus</i> | 3    | 2  | 0.666667 |
| Oxalidales   | Huaceae        | Huaceae                                  | <i>Hua_gabonii</i>               | 3    | 2  | 0.666667 |
| Oxalidales   | Connaraceae    | Connaraceae                              | <i>Connarus_spp.</i>             | 180  | 2  | 0.011111 |
| Oxalidales   | Connaraceae    | Connaraceae                              | <i>Rourea_minor</i>              | 180  | 2  | 0.011111 |
| Oxalidales   | Oxalidaceae    | Oxalidaceae                              | <i>Oxalis_spp.</i>               | 770  | 3  | 0.003896 |
| Oxalidales   | Oxalidaceae    | Oxalidaceae                              | <i>Averrhoa_carambola</i>        | 770  | 3  | 0.003896 |
| Oxalidales   | Oxalidaceae    | Oxalidaceae                              | <i>Dapania</i>                   | 770  | 3  | 0.003896 |
| Oxalidales   | Brunelliaceae  | Brunelliaceae                            | <i>Brunellia_acutangula</i>      | 55   | 1  | 0.018182 |
| Oxalidales   | Cephalotaceae  | Cephalotaceae                            | <i>Cephalotus</i>                | 1    | 1  | 1.000000 |
| Oxalidales   | Cunoniaceae    | Cunoniaceae                              | <i>Davidsonia</i>                | 280  | 2  | 0.007143 |
| Oxalidales   | Cunoniaceae    | Cunoniaceae                              | <i>Eucryphia</i>                 | 280  | 2  | 0.007143 |
| Oxalidales   | Elaeocarpaceae | Elaeocarpaceae                           | <i>Sloanea_spp.</i>              | 605  | 3  | 0.004959 |
| Oxalidales   | Elaeocarpaceae | Elaeocarpaceae                           | <i>Crinodendron_spp.</i>         | 605  | 3  | 0.004959 |
| Oxalidales   | Elaeocarpaceae | Elaeocarpaceae                           | <i>Elaeocarpus</i>               | 605  | 3  | 0.004959 |
| Malpighiales | Humiriaceae    | Humiriaceae                              | <i>Sacoglottis</i>               | 50   | 3  | 0.060000 |
| Malpighiales | Humiriaceae    | Humiriaceae                              | <i>Humiria_balsaminifera</i>     | 50   | 3  | 0.060000 |
| Malpighiales | Humiriaceae    | Humiriaceae                              | <i>Vantanea</i>                  | 50   | 3  | 0.060000 |
| Malpighiales | Ixonanthaceae  | Ixonanthaceae                            | <i>Ochthocosmus</i>              | 21   | 1  | 0.047619 |
| Malpighiales | Irvingiaceae   | Irvingiaceae                             | <i>Irvingia</i>                  | 10   | 2  | 0.200000 |
| Malpighiales | Irvingiaceae   | Irvingiaceae                             | <i>Klainedoxa</i>                | 10   | 2  | 0.200000 |
| Malpighiales | Clusiaceae     | Clusiaceae                               | <i>Symphonia_tanalensis</i>      | 595  | 3  | 0.005042 |



|              |                 |                 |                                       |      |    |          |
|--------------|-----------------|-----------------|---------------------------------------|------|----|----------|
| Malpighiales | Clusiaceae      | Clusiaceae      | <i>Clusia_gundlachii</i>              | 595  | 3  | 0.005042 |
| Malpighiales | Clusiaceae      | Clusiaceae      | <i>Garcinia</i>                       | 595  | 3  | 0.005042 |
| Malpighiales | Bonnetiaceae    | Bonnetiaceae    | <i>Archytaea</i>                      | 35   | 2  | 0.057143 |
| Malpighiales | Bonnetiaceae    | Bonnetiaceae    | <i>Bonnetia</i>                       | 35   | 2  | 0.057143 |
| Malpighiales | Calophyllaceae  | Calophyllaceae  | <i>Mesua</i>                          | 460  | 3  | 0.006522 |
| Malpighiales | Calophyllaceae  | Calophyllaceae  | <i>Calophyllum</i>                    | 460  | 3  | 0.006522 |
| Malpighiales | Calophyllaceae  | Calophyllaceae  | <i>Mammea</i>                         | 460  | 3  | 0.006522 |
| Malpighiales | Podostemaceae   | Podostemaceae   | <i>Marathrum_spp.</i>                 | 270  | 2  | 0.007407 |
| Malpighiales | Podostemaceae   | Podostemaceae   | <i>Podostemum_ceratop<br/>hyllum</i>  | 270  | 2  | 0.007407 |
| Malpighiales | Hypericaceae    | Hypericaceae    | <i>Cratoxylum_cochinchi<br/>nense</i> | 560  | 4  | 0.007143 |
| Malpighiales | Hypericaceae    | Hypericaceae    | <i>Eliea_articulata</i>               | 560  | 4  | 0.007143 |
| Malpighiales | Hypericaceae    | Hypericaceae    | <i>Hypericum_perforatu<br/>m</i>      | 560  | 4  | 0.007143 |
| Malpighiales | Hypericaceae    | Hypericaceae    | <i>Vismia_spp.</i>                    | 560  | 4  | 0.007143 |
| Malpighiales | Achariaceae     | Achariaceae     | <i>Erythrospermum</i>                 | 145  | 5  | 0.034483 |
| Malpighiales | Achariaceae     | Achariaceae     | <i>Hydnocarpus_spp.</i>               | 145  | 5  | 0.034483 |
| Malpighiales | Achariaceae     | Achariaceae     | <i>Pangium</i>                        | 145  | 5  | 0.034483 |
| Malpighiales | Achariaceae     | Achariaceae     | <i>Acharia_tragodes</i>               | 145  | 5  | 0.034483 |
| Malpighiales | Achariaceae     | Achariaceae     | <i>Kiggelaria</i>                     | 145  | 5  | 0.034483 |
| Malpighiales | Passifloraceae  | Passifloraceae  | <i>Malesherbia_linearifol<br/>ia</i>  | 935  | 4  | 0.004278 |
| Malpighiales | Passifloraceae  | Passifloraceae  | <i>Turnera_spp.</i>                   | 935  | 4  | 0.004278 |
| Malpighiales | Passifloraceae  | Passifloraceae  | <i>Paropsia</i>                       | 935  | 4  | 0.004278 |
| Malpighiales | Passifloraceae  | Passifloraceae  | <i>Passiflora_spp.</i>                | 935  | 4  | 0.004278 |
| Malpighiales | Goupiaceae      | Goupiaceae      | <i>Goupia</i>                         | 2    | 1  | 0.500000 |
| Malpighiales | Violaceae       | Violaceae       | <i>Rinorea_pubiflora</i>              | 800  | 5  | 0.006250 |
| Malpighiales | Violaceae       | Violaceae       | <i>Viola_spp.</i>                     | 800  | 5  | 0.006250 |
| Malpighiales | Violaceae       | Violaceae       | <i>Hymenanthera</i>                   | 800  | 5  | 0.006250 |
| Malpighiales | Violaceae       | Violaceae       | <i>Hybanthus</i>                      | 800  | 5  | 0.006250 |
| Malpighiales | Violaceae       | Violaceae       | <i>Leonia</i>                         | 800  | 5  | 0.006250 |
| Malpighiales | Lacistemataceae | Lacistemataceae | <i>Lacistema_aggregatu<br/>m</i>      | 14   | 2  | 0.142857 |
| Malpighiales | Lacistemataceae | Lacistemataceae | <i>Lozania</i>                        | 14   | 2  | 0.142857 |
| Malpighiales | Salicaceae      | Salicaceae      | <i>Casearia_spp.</i>                  | 1010 | 11 | 0.010891 |
| Malpighiales | Salicaceae      | Salicaceae      | <i>Lunania</i>                        | 1010 | 11 | 0.010891 |
| Malpighiales | Salicaceae      | Salicaceae      | <i>Scyphostegia</i>                   | 1010 | 11 | 0.010891 |
| Malpighiales | Salicaceae      | Salicaceae      | <i>Abatia</i>                         | 1010 | 11 | 0.010891 |
| Malpighiales | Salicaceae      | Salicaceae      | <i>Prockia</i>                        | 1010 | 11 | 0.010891 |
| Malpighiales | Salicaceae      | Salicaceae      | <i>Dovyalis</i>                       | 1010 | 11 | 0.010891 |
| Malpighiales | Salicaceae      | Salicaceae      | <i>Flacourtia</i>                     | 1010 | 11 | 0.010891 |
| Malpighiales | Salicaceae      | Salicaceae      | <i>Poliothyraxis</i>                  | 1010 | 11 | 0.010891 |
| Malpighiales | Salicaceae      | Salicaceae      | <i>Idesia</i>                         | 1010 | 11 | 0.010891 |
| Malpighiales | Salicaceae      | Salicaceae      | <i>Populus_spp.</i>                   | 1010 | 11 | 0.010891 |
| Malpighiales | Salicaceae      | Salicaceae      | <i>Salix</i>                          | 1010 | 11 | 0.010891 |
| Malpighiales | Elatinaceae     | Elatinaceae     | <i>Bergia</i>                         | 35   | 2  | 0.057143 |
| Malpighiales | Elatinaceae     | Elatinaceae     | <i>Elatine</i>                        | 35   | 2  | 0.057143 |
| Malpighiales | Malpighiaceae   | Malpighiaceae   | <i>Byrsonima_crassifolia</i>          | 1250 | 6  | 0.004800 |
| Malpighiales | Malpighiaceae   | Malpighiaceae   | <i>Acridocarpus_natalitiu<br/>s</i>   | 1250 | 6  | 0.004800 |
| Malpighiales | Malpighiaceae   | Malpighiaceae   | <i>Tetrapteryx_glabrifolia</i>        | 1250 | 6  | 0.004800 |
| Malpighiales | Malpighiaceae   | Malpighiaceae   | <i>Thryallis</i>                      | 1250 | 6  | 0.004800 |

|              |                  |                  |                                 |      |   |          |
|--------------|------------------|------------------|---------------------------------|------|---|----------|
| Malpighiales | Malpighiaceae    | Malpighiaceae    | <i>Dicella</i>                  | 1250 | 6 | 0.004800 |
| Malpighiales | Malpighiaceae    | Malpighiaceae    | <i>Malpighia</i>                | 1250 | 6 | 0.004800 |
| Malpighiales | Phyllanthaceae   | Phyllanthaceae   | <i>Aporusa</i>                  | 1745 | 6 | 0.003438 |
| Malpighiales | Phyllanthaceae   | Phyllanthaceae   | <i>Bischofia javanica</i>       | 1745 | 6 | 0.003438 |
| Malpighiales | Phyllanthaceae   | Phyllanthaceae   | <i>Phyllanthus_spp.</i>         | 1745 | 6 | 0.003438 |
| Malpighiales | Phyllanthaceae   | Phyllanthaceae   | <i>Heywoodia</i>                | 1745 | 6 | 0.003438 |
| Malpighiales | Phyllanthaceae   | Phyllanthaceae   | <i>Croizatia</i>                | 1745 | 6 | 0.003438 |
| Malpighiales | Phyllanthaceae   | Phyllanthaceae   | <i>Lachnostylis</i>             | 1745 | 6 | 0.003438 |
| Malpighiales | Picrodendraceae  | Picrodendraceae  | <i>Podocalyx</i>                | 80   | 7 | 0.087500 |
| Malpighiales | Picrodendraceae  | Picrodendraceae  | <i>Androstachys_johnsonii</i>   | 80   | 7 | 0.087500 |
| Malpighiales | Picrodendraceae  | Picrodendraceae  | <i>Tetracoccus</i>              | 80   | 7 | 0.087500 |
| Malpighiales | Picrodendraceae  | Picrodendraceae  | <i>Petalostigma</i>             | 80   | 7 | 0.087500 |
| Malpighiales | Picrodendraceae  | Picrodendraceae  | <i>Dissiliaria</i>              | 80   | 7 | 0.087500 |
| Malpighiales | Picrodendraceae  | Picrodendraceae  | <i>Austrobuxus</i>              | 80   | 7 | 0.087500 |
| Malpighiales | Picrodendraceae  | Picrodendraceae  | <i>Micrantheum</i>              | 80   | 7 | 0.087500 |
| Malpighiales | Putranjivaceae   | Putranjivaceae   | <i>Drypetes</i>                 | 210  | 1 | 0.004762 |
| Malpighiales | Lophopyxidaceae  | Lophopyxidaceae  | <i>Lophopyxis</i>               | 1    | 1 | 1.000000 |
| Malpighiales | Balanopaceae     | Balanopaceae     | <i>Balanops_vieillardii</i>     | 9    | 1 | 0.111111 |
| Malpighiales | Trigoniaceae     | Trigoniaceae     | <i>Trigonia</i>                 | 28   | 1 | 0.035714 |
| Malpighiales | Dichapetalaceae  | Dichapetalaceae  | <i>Dichapetalum</i>             | 165  | 2 | 0.012121 |
| Malpighiales | Dichapetalaceae  | Dichapetalaceae  | <i>Tapura</i>                   | 165  | 2 | 0.012121 |
| Malpighiales | Euphroniaceae    | Euphroniaceae    | <i>Euphronia</i>                | 3    | 1 | 0.333333 |
| Malpighiales | Chrysobalanaceae | Chrysobalanaceae | <i>Atuna</i>                    | 460  | 4 | 0.008696 |
| Malpighiales | Chrysobalanaceae | Chrysobalanaceae | <i>Chrysobalanus_icaco</i>      | 460  | 4 | 0.008696 |
| Malpighiales | Chrysobalanaceae | Chrysobalanaceae | <i>Hirtella</i>                 | 460  | 4 | 0.008696 |
| Malpighiales | Chrysobalanaceae | Chrysobalanaceae | <i>Licania_spp.</i>             | 460  | 4 | 0.008696 |
| Malpighiales | Pandaceae        | Pandaceae        | <i>Microdesmis</i>              | 15   | 3 | 0.200000 |
| Malpighiales | Pandaceae        | Pandaceae        | <i>Galaria</i>                  | 15   | 3 | 0.200000 |
| Malpighiales | Pandaceae        | Pandaceae        | <i>Panda</i>                    | 15   | 3 | 0.200000 |
| Malpighiales | Centroplacaceae  | Centroplacaceae  | <i>Bhesa_paniculata</i>         | 6    | 2 | 0.333333 |
| Malpighiales | Centroplacaceae  | Centroplacaceae  | <i>Centroplacus</i>             | 6    | 2 | 0.333333 |
| Malpighiales | Linaceae         | Linaceae         | <i>Reinwardtia_indica</i>       | 300  | 4 | 0.013333 |
| Malpighiales | Linaceae         | Linaceae         | <i>Linum</i>                    | 300  | 4 | 0.013333 |
| Malpighiales | Linaceae         | Linaceae         | <i>Durandea</i>                 | 300  | 4 | 0.013333 |
| Malpighiales | Linaceae         | Linaceae         | <i>Hugonia</i>                  | 300  | 4 | 0.013333 |
| Malpighiales | Ctenolophonaceae | Ctenolophonaceae | <i>Ctenolophon</i>              | 3    | 1 | 0.333333 |
| Malpighiales | Erythroxylaceae  | Erythroxylaceae  | <i>Aneulophus_africanus</i>     | 240  | 2 | 0.008333 |
| Malpighiales | Erythroxylaceae  | Erythroxylaceae  | <i>Erythroxylum_spp.</i>        | 240  | 2 | 0.008333 |
| Malpighiales | Rhizophoraceae   | Rhizophoraceae   | <i>Cassipourea_lanceolata</i>   | 149  | 6 | 0.040268 |
| Malpighiales | Rhizophoraceae   | Rhizophoraceae   | <i>Paradrypetes</i>             | 149  | 6 | 0.040268 |
| Malpighiales | Rhizophoraceae   | Rhizophoraceae   | <i>Crossostylis_grandiflora</i> | 149  | 6 | 0.040268 |
| Malpighiales | Rhizophoraceae   | Rhizophoraceae   | <i>Rhizophora_spp.</i>          | 149  | 6 | 0.040268 |
| Malpighiales | Rhizophoraceae   | Rhizophoraceae   | <i>Bruguiera</i>                | 149  | 6 | 0.040268 |
| Malpighiales | Rhizophoraceae   | Rhizophoraceae   | <i>Carallia</i>                 | 149  | 6 | 0.040268 |

|              |               |                                  |                                   |      |    |          |
|--------------|---------------|----------------------------------|-----------------------------------|------|----|----------|
| Malpighiales | Caryocaraceae | Caryocaraceae                    | <i>Caryocar</i>                   | 21   | 1  | 0.047619 |
| Malpighiales | Ochnaceae     | Ochnaceae                        | <i>Medusagyne oppositifolia</i>   | 495  | 7  | 0.014141 |
| Malpighiales | Ochnaceae     | Ochnaceae                        | <i>Quiina</i>                     | 495  | 7  | 0.014141 |
| Malpighiales | Ochnaceae     | Ochnaceae                        | <i>Touroulia</i>                  | 495  | 7  | 0.014141 |
| Malpighiales | Ochnaceae     | Ochnaceae                        | <i>Luxemburgia</i>                | 495  | 7  | 0.014141 |
| Malpighiales | Ochnaceae     | Ochnaceae                        | <i>Ochna</i>                      | 495  | 7  | 0.014141 |
| Malpighiales | Ochnaceae     | Ochnaceae                        | <i>Cespedesia</i>                 | 495  | 7  | 0.014141 |
| Malpighiales | Ochnaceae     | Ochnaceae                        | <i>Sauvagesia spp.</i>            | 495  | 7  | 0.014141 |
| Malpighiales | Peraceae      | Peraceae                         | <i>Pogonophora schomburgkiana</i> | 135  | 3  | 0.022222 |
| Malpighiales | Peraceae      | Peraceae                         | <i>Clutia</i>                     | 135  | 3  | 0.022222 |
| Malpighiales | Peraceae      | Peraceae                         | <i>Pera bicolor</i>               | 135  | 3  | 0.022222 |
| Malpighiales | Euphorbiaceae | Euphorbiaceae plus Rafflesiaceae | <i>Neoscortechinia kingii</i>     | 5755 | 21 | 0.003649 |
| Malpighiales | Euphorbiaceae | Euphorbiaceae plus Rafflesiaceae | <i>Endospermum</i>                | 5755 | 21 | 0.003649 |
| Malpighiales | Euphorbiaceae | Euphorbiaceae plus Rafflesiaceae | <i>Omphalea</i>                   | 5755 | 21 | 0.003649 |
| Malpighiales | Euphorbiaceae | Euphorbiaceae plus Rafflesiaceae | <i>Tetrorchidium</i>              | 5755 | 21 | 0.003649 |
| Malpighiales | Euphorbiaceae | Euphorbiaceae plus Rafflesiaceae | <i>Suregada</i>                   | 5755 | 21 | 0.003649 |
| Malpighiales | Euphorbiaceae | Euphorbiaceae plus Rafflesiaceae | <i>Moultonianthus</i>             | 5755 | 21 | 0.003649 |
| Malpighiales | Euphorbiaceae | Euphorbiaceae plus Rafflesiaceae | <i>Hevea</i>                      | 5755 | 21 | 0.003649 |
| Malpighiales | Euphorbiaceae | Euphorbiaceae plus Rafflesiaceae | <i>Manihot esculenta</i>          | 5755 | 21 | 0.003649 |
| Malpighiales | Euphorbiaceae | Euphorbiaceae plus Rafflesiaceae | <i>Croton</i>                     | 5755 | 21 | 0.003649 |
| Malpighiales | Euphorbiaceae | Euphorbiaceae plus Rafflesiaceae | <i>Codiaeum</i>                   | 5755 | 21 | 0.003649 |
| Malpighiales | Euphorbiaceae | Euphorbiaceae plus Rafflesiaceae | <i>Trigonostemon</i>              | 5755 | 21 | 0.003649 |
| Malpighiales | Euphorbiaceae | Euphorbiaceae plus Rafflesiaceae | <i>Pimelodendron</i>              | 5755 | 21 | 0.003649 |
| Malpighiales | Euphorbiaceae | Euphorbiaceae plus Rafflesiaceae | <i>Euphorbia spp.</i>             | 5755 | 21 | 0.003649 |

|              |               |                                        |                             |      |    |          |
|--------------|---------------|----------------------------------------|-----------------------------|------|----|----------|
| Malpighiales | Euphorbiaceae | Euphorbiaceae<br>plus<br>Rafflesiaceae | <i>Homalanthus</i>          | 5755 | 21 | 0.003649 |
| Malpighiales | Euphorbiaceae | Euphorbiaceae<br>plus<br>Rafflesiaceae | <i>Hura</i>                 | 5755 | 21 | 0.003649 |
| Malpighiales | Euphorbiaceae | Euphorbiaceae<br>plus<br>Rafflesiaceae | <i>Conceveiba</i>           | 5755 | 21 | 0.003649 |
| Malpighiales | Euphorbiaceae | Euphorbiaceae<br>plus<br>Rafflesiaceae | <i>Dalechampia</i>          | 5755 | 21 | 0.003649 |
| Malpighiales | Euphorbiaceae | Euphorbiaceae<br>plus<br>Rafflesiaceae | <i>Lasiocroton</i>          | 5755 | 21 | 0.003649 |
| Malpighiales | Euphorbiaceae | Euphorbiaceae<br>plus<br>Rafflesiaceae | <i>Ricinus</i>              | 5755 | 21 | 0.003649 |
| Malpighiales | Euphorbiaceae | Euphorbiaceae<br>plus<br>Rafflesiaceae | <i>Acalypha_californica</i> | 5755 | 21 | 0.003649 |
| Malpighiales | Euphorbiaceae | Euphorbiaceae<br>plus<br>Rafflesiaceae | <i>Spathiostemon</i>        | 5755 | 21 | 0.003649 |

**Supplementary Table 4.** Thirty core angiosperm rate shifts, including shifts in adjacent branches in a distinct phylogenetic region. Core shifts correspond to those within 95% of the magnitude of the highest Marginal Odds Ratio (MOR) in each analysis with different prior for the expected number of shifts (i.e., 0.1, 1, 5, 10, 50, 100); and that are found in at least four of the six analyses. Core shifts detected with high probability on a single phylogenetic branch, and with moderate probability on adjacent branches on a distinct phylogenetic region, are indicated. The latter are indicated by the number of the shift, followed by a letter that indicates one of the adjacent branches. The Marginal Odds Ratio (MOR), time, speciation and extinction rates of each shift, estimated with prior for the expected number of shifts = 100, are indicated.

| Core Shift Number | Core Shift Name                    | Branches (MOR) | Clade Content                                  | Number of Species | Mean Time of shift (min-max) Ma | Mean Speciation Rate (min-max) | Mean Extinction Rate (min-max) |
|-------------------|------------------------------------|----------------|------------------------------------------------|-------------------|---------------------------------|--------------------------------|--------------------------------|
| 1*                | ca. Mesangiospermae                | 1a (88.76)     | Nymphaeales, Austrobaileyales, Mesangiospermae | 276765            | 139.17 (138.97-139.40)          | 0.0989 (0.0910-0.1086)         | 0.0275 (0.0189-0.0382)         |
|                   |                                    | 1b (38.68)     | Mesangiospermae                                | 276601            | 136.88 (135.92-137.68)          | 0.0998 (0.0918-0.1098)         | 0.0278 (0.0188-0.0386)         |
| 2                 | Vitales+Rosids                     | 2 (11.94)      | Vitales, Rosidae                               | 81498             | 121.98 (121.32-122.40)          | 0.1087 (0.0942-0.1279)         | 0.0305 (0.0152-0.0516)         |
| 3                 | ca. Fabidae                        | 3a (132.07)    | Fabidae                                        | 51100             | 117.68 (116.81-118.58)          | 0.1123 (0.0957-0.1351)         | 0.0312 (0.0135-0.0551)         |
|                   |                                    | 3b (47.93)     | Fabidae minus Zygophyllales                    | 50797             | 116.28 (115.79-116.81)          | 0.1131 (0.0964-0.1361)         | 0.0316 (0.0135-0.0560)         |
|                   |                                    | 3c (23.54)     | Celastrales, Oxalidales, Malpighiales          | 19309             | 113.80 (112.04-115.78)          | 0.1041 (0.0894-0.1254)         | 0.0221 (0.0074-0.0469)         |
|                   |                                    | 3d (121.01)    | Oxalidales, Malpighiales                       | 17906             | 111.70 (111.43-112.02)          | 0.0985 (0.0848-0.1214)         | 0.0181 (0.0040-0.0429)         |
| 4                 | Ericales                           | 4 (47.84)      | Ericales                                       | 11871             | 107.76 (103.59-112.34)          | 0.0976 (0.0753-0.1457)         | 0.0244 (0.0026-0.0807)         |
| 5                 | Myrtales                           | 5 (23.42)      | Myrtales                                       | 11632             | 105.45 (96.64-116.37)           | 0.1435 (0.0818-0.2837)         | 0.0586 (0.0011-0.2147)         |
| 6*                | Arecales+Commelinales+Zingiberales | 6 (17.19)      | Arecales, Commelinales, Zingiberales           | 5450              | 102.14 (98.21-106.73)           | 0.1174 (0.0702-0.1939)         | 0.0385 (0.0018-0.1204)         |
| 7                 | ca. Ranunculaceae                  | 7a (47.86)     | Menispermaceae, Berberidaceae, Ranunculaceae   | 3668              | 93.78 (89.93-98.17)             | 0.1328 (0.0837-0.2644)         | 0.0484 (0.0013-0.1948)         |
|                   |                                    | 7b (8.60)      | Berberidaceae, Ranunculaceae                   | 3226              | 84.70 (80.29-89.90)             | 0.1411 (0.0869-0.2847)         | 0.0528 (0.0012-0.2135)         |

|     |                                                      |                 |                                                                                                        |       |                             |                               |                               |
|-----|------------------------------------------------------|-----------------|--------------------------------------------------------------------------------------------------------|-------|-----------------------------|-------------------------------|-------------------------------|
| 8*  | Lamiidae                                             | 9<br>(133.2)    | Gentianales,<br>Solanales,<br>Boraginales,<br>Lamiales                                                 | 50437 | 91.14<br>(89.75-<br>92.67)  | 0.1427<br>(0.1269-<br>0.1663) | 0.0201<br>(0.0069-<br>0.0477) |
| 9*  | ca. Fabaceae                                         | 9a<br>(12.94)   | Surianaceae,<br>Fabaceae                                                                               | 19508 | 93.83<br>(92.16-<br>96.03)  | 0.2565<br>(0.1247-<br>0.4681) | 0.1533<br>(0.0111-<br>0.3789) |
|     |                                                      | 9b<br>(47.43)   | Fabaceae                                                                                               | 19500 | 88.05<br>(84.76-<br>92.13)  | 0.2780<br>(0.1316-<br>0.5094) | 0.1675<br>(0.0104-<br>0.4132) |
| 10  | Asparagaceae+                                        | 11<br>(57.19)   | Tecophilaceae,<br>Iridaceae,<br>Asphodelaceae,<br>Xanthorrhoeaceae,<br>Amarillidaceae,<br>Asparagaceae | 4227  | 84.25<br>(80.66-<br>88.94)  | 0.1638<br>(0.1083-<br>0.3145) | 0.0540<br>(0.0012-<br>0.2181) |
| 11  | ca. Sapindales                                       | 11a<br>(12.14)  | Sapindales minus<br>Biebersteiniaceae                                                                  | 6077  | 85.35<br>(83.42-<br>87.50)  | 0.1251<br>(0.0755-<br>0.2373) | 0.0391<br>(0.0009-<br>0.1620) |
|     |                                                      | 11b<br>(110.93) | Sapindales minus<br>Biebersteiniaceae<br>and Nitrariaceae                                              | 6061  | 81.50<br>(79.92-<br>83.35)  | 0.1355<br>(0.0760-<br>0.2622) | 0.0434<br>(0.0006-<br>0.1821) |
| 12  | Polygonaceae+<br>Polygonaceae                        | 12<br>(14.40)   | Polygonaceae,<br>Plumbaginaceae                                                                        | 1946  | 76.87<br>(67.91-<br>93.26)  | 0.1566<br>(0.0412-<br>0.3736) | 0.0735<br>(0.0001-<br>0.2850) |
| 13* | ca. Asteraceae                                       | 13a<br>(63.71)  | Stylidaceae,<br>Menyanthaceae,<br>Goodeniaceae,<br>Calyceraceae,<br>Asteraceae                         | 24393 | 76.79<br>(76.48-<br>77.10)  | 0.2258<br>(0.1329-<br>0.4081) | 0.1027<br>(0.0059-<br>0.2936) |
|     |                                                      | 13b<br>(30.30)  | Goodeniaceae,<br>Calyceraceae,<br>Asteraceae                                                           | 24090 | 61.14<br>(57.05-<br>68.26)  | 0.3394<br>(0.1914-<br>0.6527) | 0.1643<br>(0.0086-<br>0.4950) |
|     |                                                      | 13c<br>(21.05)  | Asteraceae                                                                                             | 23600 | 47.07<br>(45.27-<br>49.27)  | 0.3770<br>(0.2075-<br>0.7203) | 0.1788<br>(0.0079-<br>0.5359) |
| 14  | Dipsacales                                           | 14<br>(32.36)   | Dipsacales                                                                                             | 1090  | 75.76<br>(70.94-<br>81.84)  | 0.1690<br>(0.1078-<br>0.2938) | 0.0685<br>(0.0039-<br>0.2108) |
| 15* | Montiniaceae+<br>Hydroleaceae+<br>Sphenocleacea<br>e | 15<br>(61.74)   | Montiniaceae,<br>Hydroleaceae,<br>Sphenocleacea                                                        | 19    | 75.76<br>(72.04-<br>79.24)  | 0.0705<br>(0.0190-<br>0.2240) | 0.0461<br>(0.0010-<br>0.2185) |
| 16  | Orchidaceae                                          | 16<br>(9.96)    | Orchidaceae                                                                                            | 22075 | 73.07<br>(59.75-<br>108.78) | 0.2349<br>(0.1059-<br>0.5024) | 0.1225<br>(0.0042-<br>0.3954) |
| 17  | Crassulaceae                                         | 17<br>(11.74)   | Crassulaceae                                                                                           | 1400  | 72.91<br>(60.69-<br>95.33)  | 0.1713<br>(0.0415-<br>0.3842) | 0.0861<br>(0.0002-<br>0.2998) |
| 18  | Moraceae+Urti<br>caceae                              | 18<br>(12.64)   | Moraceae,<br>Urticaceae                                                                                | 1125  | 70.93<br>(68.52-<br>73.43)  | 0.1199<br>(0.0728-<br>0.2930) | 0.0333<br>(0.0001-<br>0.1998) |

|     |                                                 |         |                                             |       |                   |                     |                     |
|-----|-------------------------------------------------|---------|---------------------------------------------|-------|-------------------|---------------------|---------------------|
| 19* | ca. Apiales                                     | 19a     | Pittosporaceae.                             | 5449  | 66.28             | 0.2895              | 0.1584              |
|     |                                                 | (61.66) | Araliaceae,<br>Myodocarpaceae,<br>Apiaceae  |       | (63.37-<br>70.53) | (0.1584-<br>0.5645) | (0.0151-<br>0.4485) |
| 20  | ca. Cyperaceae                                  | 19b     | Araliaceae,<br>Myodocarpaceae,<br>Apiaceae  | 5249  | 61.49             | 0.2949              | 0.1609              |
|     |                                                 | (7.54)  |                                             |       | (60.20-<br>63.37) | (0.1626-<br>0.5716) | (0.0153-<br>0.4540) |
| 20  | ca. Cyperaceae                                  | 20a     | Juncaceae,<br>Cyperaceae                    | 5864  | 62.74             | 0.1760              | 0.0671              |
|     |                                                 | (10.38) |                                             |       | (55.19-<br>77.05) | (0.0691-<br>0.3829) | (0.0009-<br>0.2713) |
| 21  | ca. Euphorbiaceae                               | 20b     | Cyperaceae                                  | 5430  | 37.29             | 0.2310              | 0.0907              |
|     |                                                 | (9.82)  |                                             |       | (29.93-<br>55.14) | (0.0633-<br>0.4817) | (0.0009-<br>0.3505) |
| 21  | ca. Euphorbiaceae                               | 21a     | Euphorbiaceae                               | 5755  | 67.13             | 0.2125              | 0.0819              |
|     |                                                 | (21.68) |                                             |       | (61.91-<br>74.23) | (0.1399-<br>0.3738) | (0.0034-<br>0.2613) |
| 22  | Campanulaceae                                   | 21b     | Euphorbiaceae<br>minus<br>Neoscortechinia   | 5750  | 59.34             | 0.2190              | 0.0854              |
|     |                                                 | (43.88) |                                             |       | (57.09-<br>61.88) | (0.1423-<br>0.3907) | (0.0030-<br>0.2720) |
| 22  | Campanulaceae                                   | 22      | Campanulaceae                               | 2380  | 54.34             | 0.2348              | 0.1059              |
| 23  | Celastraceae                                    | 23      | Celastraceae<br>excluding Parnassia         | 1335  | 51.15             | 0.2474              | 0.1155              |
|     |                                                 |         |                                             |       |                   |                     |                     |
| 24  | Amaranthaceae                                   | 24      | Amaranthaceae                               | 1379  | 51.01             | 0.2065              | 0.0796              |
| 25* | Piperaceae                                      | 25      | Piperaceae                                  | 3615  | 48.79             | 0.1988              | 0.0709              |
|     |                                                 |         |                                             |       |                   |                     |                     |
| 26* | ca. Brassicaceae+<br>Cleomaceae+Ca<br>pparaceae | 26a     | Capparaceae,<br>Brassicaceae,<br>Cleomaceae | 4490  | 47.96             | 0.2469              | 0.0819              |
|     |                                                 | (31.40) |                                             |       | (44.22-<br>54.18) | (0.1425-<br>0.4518) | (0.0023-<br>0.2986) |
| 27  | Poaceae                                         | 26b     | Brassicaceae,<br>Cleomaceae                 | 4010  | 32.79             | 0.2888              | 0.0963              |
|     |                                                 | (10.40) |                                             |       | (27.45-<br>44.01) | (0.1596-<br>0.5419) | (0.0022-<br>0.3489) |
| 27  | Poaceae                                         | 27      | Poaceae                                     | 11337 | 45.27             | 0.3029              | 0.1058              |
| 28  | Cucurbitaceae                                   | 28      | Cucurbitaceae                               | 960   | 42.61             | 0.2418              | 0.0925              |
|     |                                                 |         |                                             |       |                   |                     |                     |
| 29  | ca. Malvaceae                                   | 29a     | Malvales excluding<br>Neuradaceae           | 6083  | 72.70             | 0.1763              | 0.0646              |
|     |                                                 | (11.25) |                                             |       | (70.14-<br>76.17) | (0.1042-<br>0.3372) | (0.0026-<br>0.2361) |
| 30* | ca. Cactaceae                                   | 29b     | Malvaceae                                   | 4225  | 39.53             | 0.2944              | 0.1149              |
|     |                                                 | (14.75) |                                             |       | (33.31-<br>59.69) | (0.1611-<br>0.5645) | (0.0033-<br>0.4014) |
| 30* | ca. Cactaceae                                   | 30a     | Talinaceae,<br>Portulacaceae,<br>Cactaceae  | 2025  | 35.90             | 0.1904              | 0.0570              |
|     |                                                 | (17.92) |                                             |       | (33.33-<br>39.44) | (0.0976-<br>0.3605) | (0.0013-<br>0.2281) |

|         |                |        |         |          |          |
|---------|----------------|--------|---------|----------|----------|
| 30b     | Portulacaceae, | 276765 | 30.80   | 0.2108   | 0.0629   |
| (21.47) | Cactaceae      |        | (28.82- | (0.0974- | (0.0013- |
|         |                |        | 33.29)  | 0.4308)  | 0.2426)  |



**Supplementary Table 5.** Values of Marginal Odds Ratio (MOR) and associated parameters. Absolute magnitude of the maximal Marginal Odds Ratio (MOR) in six analyses conducted under different magnitudes for the prior on the expected number of shifts (0.1, 1, 5, 10, 50, 100), and associated parameters.

|                                                                  | 0.1        | 1         | 5       | 10      | 50     | 100    |
|------------------------------------------------------------------|------------|-----------|---------|---------|--------|--------|
| Magnitude of highest MOR                                         | 254,012.78 | 16,281.31 | 3288.44 | 2049.28 | 292.89 | 133.28 |
| Magnitude of 95% cutoff                                          | 12,700.64  | 814.07    | 164.42  | 102.46  | 14.64  | 6.66   |
| Number of shifts within the cutoff                               | 22         | 44        | 47      | 41      | 59     | 69     |
| Number of shifts within the cutoff only present in this analysis | 2          | 2         | 3       | 1       | 17     | 24     |
| Number of shifts with MOR >0                                     | 611        | 1191      | 1344    | 1386    | 1400   | 1386   |
